# Supplementary material for: B-substituted group 1 phosphides: synthesis and reactivity
Source: Royal Society of Chemistry journal article supplement (doi:10.1039/d3dt02568c), 2023-01-01
Supplement: d3dt02568c5.pdf [file d3dt02568c5.pdf]

*Supplementary Information*

**B-substituted group 1 phosphides: Synthesis and reactivity<sup>†</sup>**

Michal Aman,<sup>a</sup> Libor Dostál,<sup>a</sup> Aleš Růžička,<sup>a</sup> Zdenka Růžičková,<sup>a</sup> Roman Jambor<sup>a\*</sup>

<sup>a</sup> Department of General and Inorganic Chemistry, University of Pardubice, 532 10 Pardubice, Czech Republic, E-mail: [roman.jambor@upce.cz](mailto:roman.jambor@upce.cz),

|                                                                                                                                                                                                                                                        |     |
|--------------------------------------------------------------------------------------------------------------------------------------------------------------------------------------------------------------------------------------------------------|-----|
| Figure S1. PovRay presentation of molecular structure of <b>3</b> . Hydrogen atoms are omitted for clarity.....                                                                                                                                        | S4  |
| Figure S2. <sup>1</sup> H NMR (C <sub>6</sub> D <sub>6</sub> , 500.13 MHz) of 1-BCy <sub>2</sub> -8-PCl <sub>2</sub> -C <sub>10</sub> H <sub>6</sub> ( <b>1</b> ) .....                                                                                | S2  |
| Figure S3. <sup>13</sup> C{ <sup>1</sup> H} NMR (C <sub>6</sub> D <sub>6</sub> , 125.77 MHz) of 1-BCy <sub>2</sub> -8-PCl <sub>2</sub> -C <sub>10</sub> H <sub>6</sub> ( <b>1</b> ) .....                                                              | S6  |
| Figure S4. <sup>11</sup> B{ <sup>1</sup> H} NMR (C <sub>6</sub> D <sub>6</sub> , 160.57 MHz) of 1-BCy <sub>2</sub> -8-PCl <sub>2</sub> -C <sub>10</sub> H <sub>6</sub> ( <b>1</b> ) .....                                                              | S7  |
| Figure S5. <sup>31</sup> P{ <sup>1</sup> H} NMR (C <sub>6</sub> D <sub>6</sub> , 202.49 MHz) of 1-BCy <sub>2</sub> -8-PCl <sub>2</sub> -C <sub>10</sub> H <sub>6</sub> ( <b>1</b> ) .....                                                              | S8  |
| Figure S6. <sup>1</sup> H NMR (C <sub>6</sub> D <sub>6</sub> , 500.13 MHz) of 1-BCy <sub>2</sub> -8-PPhCl-C <sub>10</sub> H <sub>6</sub> ( <b>2</b> ) .....                                                                                            | S9  |
| Figure S7. <sup>13</sup> C{ <sup>1</sup> H} NMR (C <sub>6</sub> D <sub>6</sub> , 125.77 MHz) of 1-BCy <sub>2</sub> -8-PPhCl-C <sub>10</sub> H <sub>6</sub> ( <b>2</b> ).....                                                                           | S10 |
| Figure S8. <sup>11</sup> B{ <sup>1</sup> H} NMR (C <sub>6</sub> D <sub>6</sub> , 160.57 MHz) of 1-BCy <sub>2</sub> -8-PPhCl-C <sub>10</sub> H <sub>6</sub> ( <b>2</b> ).....                                                                           | S11 |
| Figure S9. <sup>31</sup> P{ <sup>1</sup> H} NMR (C <sub>6</sub> D <sub>6</sub> , 202.49 MHz) of 1-BCy <sub>2</sub> -8-PPhCl-C <sub>10</sub> H <sub>6</sub> ( <b>2</b> ).....                                                                           | S12 |
| Figure S10. <sup>1</sup> H NMR (THF-d <sub>8</sub> , 500.13 MHz) of {1-BCy-8-PCy-C <sub>10</sub> H <sub>6</sub> } <sub>2</sub> ( <b>3</b> ).....                                                                                                       | S13 |
| Figure S11. <sup>13</sup> C{ <sup>1</sup> H} NMR (THF-d <sub>8</sub> , 125.77 MHz) of {1-BCy-8-PCy-C <sub>10</sub> H <sub>6</sub> } <sub>2</sub> ( <b>3</b> ).....                                                                                     | S14 |
| Figure S12. <sup>11</sup> B{ <sup>1</sup> H} NMR (THF-d <sub>8</sub> , 160.57 MHz) of {1-BCy-8-PCy-C <sub>10</sub> H <sub>6</sub> } <sub>2</sub> ( <b>3</b> ).....                                                                                     | S15 |
| Figure S13. <sup>31</sup> P{ <sup>1</sup> H} NMR (THF-d <sub>8</sub> , 202.49 MHz) of {1-BCy-8-PCy-C <sub>10</sub> H <sub>6</sub> } <sub>2</sub> ( <b>3</b> ).....                                                                                     | S16 |
| Figure S14. <sup>1</sup> H NMR (THF-d <sub>8</sub> , 500.13 MHz) of {1-BCy <sub>2</sub> -8-PPh-C <sub>10</sub> H <sub>6</sub> } <sub>2</sub> ( <b>4</b> ) .....                                                                                        | S17 |
| Figure S15. <sup>13</sup> C{ <sup>1</sup> H} NMR (THF-d <sub>8</sub> , 125.77 MHz) of {1-BCy <sub>2</sub> -8-PPh-C <sub>10</sub> H <sub>6</sub> } <sub>2</sub> ( <b>4</b> ) .....                                                                      | S18 |
| Figure S16. <sup>11</sup> B{ <sup>1</sup> H} NMR (THF-d <sub>8</sub> , 160.57 MHz) of {1-BCy <sub>2</sub> -8-PPh-C <sub>10</sub> H <sub>6</sub> } <sub>2</sub> ( <b>4</b> ) .....                                                                      | S19 |
| Figure S17. <sup>31</sup> P{ <sup>1</sup> H} NMR (THF-d <sub>8</sub> , 202.49 MHz) of {1-BCy <sub>2</sub> -8-PPh-C <sub>10</sub> H <sub>6</sub> } <sub>2</sub> ( <b>4</b> ) .....                                                                      | S20 |
| Figure S18. <sup>1</sup> H NMR (THF-d <sub>8</sub> , 500.13 MHz) of [Na(THF) <sub>3</sub> ] <sup>+</sup> [1-BCy <sub>2</sub> -8-PPh-C <sub>10</sub> H <sub>6</sub> ] <sup>-</sup> ( <b>5</b> ) .....                                                   | S21 |
| Figure S19. <sup>13</sup> C{ <sup>1</sup> H} NMR (THF-d <sub>8</sub> , 125.77 MHz) of [Na(THF) <sub>3</sub> ] <sup>+</sup> [1-BCy <sub>2</sub> -8-PPh-C <sub>10</sub> H <sub>6</sub> ] <sup>-</sup> ( <b>5</b> ).....                                  | S22 |
| Figure S20. <sup>11</sup> B{ <sup>1</sup> H} NMR (THF-d <sub>8</sub> , 160.57 MHz) of [Na(THF) <sub>3</sub> ] <sup>+</sup> [1-BCy <sub>2</sub> -8-PPh-C <sub>10</sub> H <sub>6</sub> ] <sup>-</sup> ( <b>5</b> ) .....                                 | S23 |
| Figure S21. <sup>31</sup> P{ <sup>1</sup> H} NMR (THF-d <sub>8</sub> , 202.49 MHz) of [Na(THF) <sub>3</sub> ] <sup>+</sup> [1-BCy <sub>2</sub> -8-PPh-C <sub>10</sub> H <sub>6</sub> ] <sup>-</sup> ( <b>5</b> ) .....                                 | S24 |
| Figure S22. <sup>1</sup> H NMR (THF-d <sub>8</sub> , 500.13 MHz) of {[K(THF) <sub>2</sub> ] <sup>+</sup> [1-BCy <sub>2</sub> -8-PPh-C <sub>10</sub> H <sub>6</sub> ] <sup>-</sup> } <sub>∞</sub> ( <b>6</b> ).....                                     | S25 |
| Figure S23. <sup>13</sup> C{ <sup>1</sup> H} NMR (THF-d <sub>8</sub> , 125.77 MHz) of {[K(THF) <sub>2</sub> ] <sup>+</sup> [1-BCy <sub>2</sub> -8-PPh-C <sub>10</sub> H <sub>6</sub> ] <sup>-</sup> } <sub>∞</sub> ( <b>6</b> ) .....                  | S26 |
| Figure S24. <sup>11</sup> B{ <sup>1</sup> H} NMR (THF-d <sub>8</sub> , 160.57 MHz) of {[K(THF) <sub>2</sub> ] <sup>+</sup> [1-BCy <sub>2</sub> -8-PPh-C <sub>10</sub> H <sub>6</sub> ] <sup>-</sup> } <sub>∞</sub> ( <b>6</b> ) .....                  | S27 |
| Figure S25. <sup>31</sup> P{ <sup>1</sup> H} NMR (THF-d <sub>8</sub> , 202.49 MHz) of {[K(THF) <sub>2</sub> ] <sup>+</sup> [1-BCy <sub>2</sub> -8-PPh-C <sub>10</sub> H <sub>6</sub> ] <sup>-</sup> } <sub>∞</sub> ( <b>6</b> ) .....                  | S28 |
| Figure S26. <sup>1</sup> H NMR (THF-d <sub>8</sub> , 500.13 MHz) of {[Na(THF) <sub>2</sub> ] <sup>+</sup> [1-BCy <sub>2</sub> -8-P(O)Ph-C <sub>10</sub> H <sub>6</sub> ] <sup>-</sup> } <sub>2</sub> ( <b>7</b> ).....                                 | S29 |
| Figure S27. <sup>13</sup> C{ <sup>1</sup> H} NMR (THF-d <sub>8</sub> , 125.77 MHz) of {[Na(THF) <sub>2</sub> ] <sup>+</sup> [1-BCy <sub>2</sub> -8-P(O)Ph-C <sub>10</sub> H <sub>6</sub> ] <sup>-</sup> } <sub>2</sub> ( <b>7</b> ).....               | S30 |
| Figure S28. <sup>11</sup> B{ <sup>1</sup> H} NMR (THF-d <sub>8</sub> , 160.57 MHz) of {[Na(THF) <sub>2</sub> ] <sup>+</sup> [1-BCy <sub>2</sub> -8-P(O)Ph-C <sub>10</sub> H <sub>6</sub> ] <sup>-</sup> } <sub>2</sub> ( <b>7</b> ).....               | S31 |
| Figure S29. <sup>31</sup> P{ <sup>1</sup> H} NMR (THF-d <sub>8</sub> , 202.49 MHz) of {[Na(THF) <sub>2</sub> ] <sup>+</sup> [1-BCy <sub>2</sub> -8-P(O)Ph-C <sub>10</sub> H <sub>6</sub> ] <sup>-</sup> } <sub>2</sub> ( <b>7</b> ) .....              | S32 |
| Figure S30. <sup>1</sup> H NMR (C <sub>6</sub> D <sub>6</sub> , 500.13 MHz) of {[Na(THF) <sub>2</sub> ] <sup>+</sup> [1-BCy <sub>2</sub> -8-P(S)Ph-C <sub>10</sub> H <sub>6</sub> ] <sup>-</sup> } <sub>2</sub> ( <b>8</b> ) .....                     | S33 |
| Figure S31. <sup>13</sup> C{ <sup>1</sup> H} NMR (C <sub>6</sub> D <sub>6</sub> , 125.77 MHz) of {[Na(THF) <sub>2</sub> ] <sup>+</sup> [1-BCy <sub>2</sub> -8-P(S)Ph-C <sub>10</sub> H <sub>6</sub> ] <sup>-</sup> } <sub>2</sub> ( <b>8</b> ).....    | S34 |
| Figure S32. <sup>11</sup> B{ <sup>1</sup> H} NMR (C <sub>6</sub> D <sub>6</sub> , 160.57 MHz) of {[Na(THF) <sub>2</sub> ] <sup>+</sup> [1-BCy <sub>2</sub> -8-P(S)Ph-C <sub>10</sub> H <sub>6</sub> ] <sup>-</sup> } <sub>2</sub> ( <b>8</b> ) .....   | S35 |
| Figure S33. <sup>31</sup> P{ <sup>1</sup> H} NMR (C <sub>6</sub> D <sub>6</sub> , 202.49 MHz) of {[Na(THF) <sub>2</sub> ] <sup>+</sup> [1-BCy <sub>2</sub> -8-P(S)Ph-C <sub>10</sub> H <sub>6</sub> ] <sup>-</sup> } <sub>2</sub> ( <b>8</b> ).....    | S36 |
| Figure S34. <sup>1</sup> H NMR (THF-d <sub>8</sub> , 500.13 MHz) of {[Na(THF) <sub>2</sub> ] <sup>+</sup> [1-BCy <sub>2</sub> -8-P(Se)Ph-C <sub>10</sub> H <sub>6</sub> ] <sup>-</sup> } <sub>2</sub> ( <b>9</b> ).....                                | S37 |
| Figure S35. <sup>13</sup> C{ <sup>1</sup> H} NMR (THF-d <sub>8</sub> , 125.77 MHz) of {[Na(THF) <sub>2</sub> ] <sup>+</sup> [1-BCy <sub>2</sub> -8-P(Se)Ph-C <sub>10</sub> H <sub>6</sub> ] <sup>-</sup> } <sub>2</sub> ( <b>9</b> ) .....             | S38 |
| Figure S36. <sup>11</sup> B{ <sup>1</sup> H} NMR (THF-d <sub>8</sub> , 160.57 MHz) of {[Na(THF) <sub>2</sub> ] <sup>+</sup> [1-BCy <sub>2</sub> -8-P(Se)Ph-C <sub>10</sub> H <sub>6</sub> ] <sup>-</sup> } <sub>2</sub> ( <b>9</b> ) .....             | S39 |
| Figure S37. <sup>31</sup> P{ <sup>1</sup> H} NMR (THF-d <sub>8</sub> , 202.49 MHz) of {[Na(THF) <sub>2</sub> ] <sup>+</sup> [1-BCy <sub>2</sub> -8-P(Se)Ph-C <sub>10</sub> H <sub>6</sub> ] <sup>-</sup> } <sub>2</sub> ( <b>9</b> ) .....             | S40 |
| Figure S38. <sup>1</sup> H NMR (THF-d <sub>8</sub> , 500.13 MHz) of {[Na(THF) <sub>2</sub> ] <sup>+</sup> [1-BCy <sub>2</sub> -8-P{CH=C(O)C(Me)O}Ph-C <sub>10</sub> H <sub>6</sub> ] <sup>-</sup> } <sub>2</sub> ( <b>10</b> ) .....                   | S41 |
| Figure S39. <sup>13</sup> C{ <sup>1</sup> H} NMR (THF-d <sub>8</sub> , 125.77 MHz) of {[Na(THF) <sub>2</sub> ] <sup>+</sup> [1-BCy <sub>2</sub> -8-P{CH=C(O)C(Me)O}Ph-C <sub>10</sub> H <sub>6</sub> ] <sup>-</sup> } <sub>2</sub> ( <b>10</b> ) ..... | S42 |
| Figure S40. <sup>11</sup> B{ <sup>1</sup> H} NMR (THF-d <sub>8</sub> , 160.57 MHz) of {[Na(THF) <sub>2</sub> ] <sup>+</sup> [1-BCy <sub>2</sub> -8-P{CH=C(O)C(Me)O}Ph-C <sub>10</sub> H <sub>6</sub> ] <sup>-</sup> } <sub>2</sub> ( <b>10</b> ) ..... | S43 |
| Figure S41. <sup>31</sup> P{ <sup>1</sup> H} NMR (THF-d <sub>8</sub> , 202.49 MHz) of {[Na(THF) <sub>2</sub> ] <sup>+</sup> [1-BCy <sub>2</sub> -8-P{CH=C(O)C(Me)O}Ph-C <sub>10</sub> H <sub>6</sub> ] <sup>-</sup> } <sub>2</sub> ( <b>10</b> ).....  | S44 |
| Figure S42. <sup>1</sup> H- <sup>1</sup> H COSY NMR of {[Na(THF) <sub>2</sub> ] <sup>+</sup> [1-BCy <sub>2</sub> -8-P{CH=C(O)C(Me)O}Ph-C <sub>10</sub> H <sub>6</sub> ] <sup>-</sup> } <sub>2</sub> ( <b>10</b> ).....                                 | S45 |
| Figure S43. <sup>1</sup> H- <sup>13</sup> C HSQC NMR of {[Na(THF) <sub>2</sub> ] <sup>+</sup> [1-BCy <sub>2</sub> -8-P{CH=C(O)C(Me)O}Ph-C <sub>10</sub> H <sub>6</sub> ] <sup>-</sup> } <sub>2</sub> ( <b>10</b> ) .....                               | S46 |
| Figure S44. <sup>1</sup> H NMR (THF-d <sub>8</sub> , 500.13 MHz) of [1-BCy <sub>2</sub> -8-P{C(O)tBu}Ph-C <sub>10</sub> H <sub>6</sub> ] ( <b>11</b> ) .....                                                                                           | S47 |
| Figure S45. <sup>13</sup> C{ <sup>1</sup> H} NMR (THF-d <sub>8</sub> , 125.77 MHz) of [1-BCy <sub>2</sub> -8-P{C(O)tBu}Ph-C <sub>10</sub> H <sub>6</sub> ] ( <b>11</b> ) .....                                                                         | S48 |
| Figure S46. <sup>11</sup> B{ <sup>1</sup> H} NMR (THF-d <sub>8</sub> , 160.57 MHz) of [1-BCy <sub>2</sub> -8-P{C(O)tBu}Ph-C <sub>10</sub> H <sub>6</sub> ] ( <b>11</b> ) .....                                                                         | S49 |
| Figure S47. <sup>31</sup> P{ <sup>1</sup> H} NMR (THF-d <sub>8</sub> , 202.49 MHz) of [1-BCy <sub>2</sub> -8-P{C(O)tBu}Ph-C <sub>10</sub> H <sub>6</sub> ] ( <b>11</b> ).....                                                                          | S50 |
| Figure S48. <sup>1</sup> H NMR (THF-d <sub>8</sub> , 500.13 MHz) of [1-BCy <sub>2</sub> -8-P(SnL)Ph-C <sub>10</sub> H <sub>6</sub> ] ( <b>12</b> ).....                                                                                                | S51 |
| Figure S49. <sup>13</sup> C{ <sup>1</sup> H} NMR (THF-d <sub>8</sub> , 125.77 MHz) of [1-BCy <sub>2</sub> -8-P(SnL)Ph-C <sub>10</sub> H <sub>6</sub> ] ( <b>12</b> ).....                                                                              | S52 |
| Figure S50. <sup>11</sup> B{ <sup>1</sup> H} NMR (THF-d <sub>8</sub> , 160.57 MHz) of [1-BCy <sub>2</sub> -8-P(SnL)Ph-C <sub>10</sub> H <sub>6</sub> ] ( <b>12</b> ).....                                                                              | S53 |
| Figure S51. <sup>31</sup> P{ <sup>1</sup> H} NMR (THF-d <sub>8</sub> , 202.49 MHz) of [1-BCy <sub>2</sub> -8-P(SnL)Ph-C <sub>10</sub> H <sub>6</sub> ] ( <b>12</b> ) .....                                                                             | S54 |
| Figure S52. <sup>119</sup> Sn{ <sup>1</sup> H} NMR (THF-d <sub>8</sub> , 186.52 MHz) of [1-BCy <sub>2</sub> -8-P(SnL)Ph-C <sub>10</sub> H <sub>6</sub> ] ( <b>12</b> ) .....                                                                           | S55 |
| Figure S53. <sup>1</sup> H NMR (C <sub>6</sub> D <sub>6</sub> , 500.13 MHz) of [1-BCy <sub>2</sub> -8-P(PbL)Ph-C <sub>10</sub> H <sub>6</sub> ] ( <b>13</b> ).....                                                                                     | S56 |
| Figure S54. <sup>13</sup> C{ <sup>1</sup> H} NMR (C <sub>6</sub> D <sub>6</sub> , 125.77 MHz) of [1-BCy <sub>2</sub> -8-P(PbL)Ph-C <sub>10</sub> H <sub>6</sub> ] ( <b>13</b> ).....                                                                   | S57 |
| Figure S55. <sup>11</sup> B{ <sup>1</sup> H} NMR (C <sub>6</sub> D <sub>6</sub> , 160.57 MHz) of [1-BCy <sub>2</sub> -8-P(PbL)Ph-C <sub>10</sub> H <sub>6</sub> ] ( <b>13</b> ).....                                                                   | S58 |
| Figure S56. <sup>31</sup> P{ <sup>1</sup> H} NMR (C <sub>6</sub> D <sub>6</sub> , 202.49 MHz) of [1-BCy <sub>2</sub> -8-P(PbL)Ph-C <sub>10</sub> H <sub>6</sub> ] ( <b>13</b> ) .....                                                                  | S59 |
| Figure S57. <sup>209</sup> Pb{ <sup>1</sup> H} NMR (C <sub>6</sub> D <sub>6</sub> , 104.64 MHz) of [1-BCy <sub>2</sub> -8-P(PbL)Ph-C <sub>10</sub> H <sub>6</sub> ] ( <b>13</b> ).....                                                                 | S60 |
| Figure S58. The <sup>31</sup> P{ <sup>1</sup> H} NMR spectra of the reaction mixture of <b>5</b> and 2,3-butanedione.....                                                                                                                              | S61 |

|                                                                                                                                                                                                                                                                 |     |
|-----------------------------------------------------------------------------------------------------------------------------------------------------------------------------------------------------------------------------------------------------------------|-----|
| Figure S59. $^1\text{H}$ NMR spectrum of $\text{H}_2$ in THF/ $\text{C}_6\text{D}_6$ .....                                                                                                                                                                      | S62 |
| Figure S60. Expanded part of the $^1\text{H}$ NMR spectrum of the reaction mixture of <b>5</b> and 2,3-butanedione in THF/ $\text{C}_6\text{D}_6$ .....                                                                                                         | S63 |
| Table S1. Crystallographic data of compounds <b>3</b> , <b>4</b> ·( $\text{C}_4\text{H}_8\text{O}$ ), <b>5</b> , <b>6</b> , <b>7</b> , <b>9</b> , <b>10</b> ·2( $\text{C}_4\text{H}_8\text{O}$ ), <b>11</b> , and <b>12</b> ·0.5( $\text{C}_7\text{H}_8$ )..... | S64 |

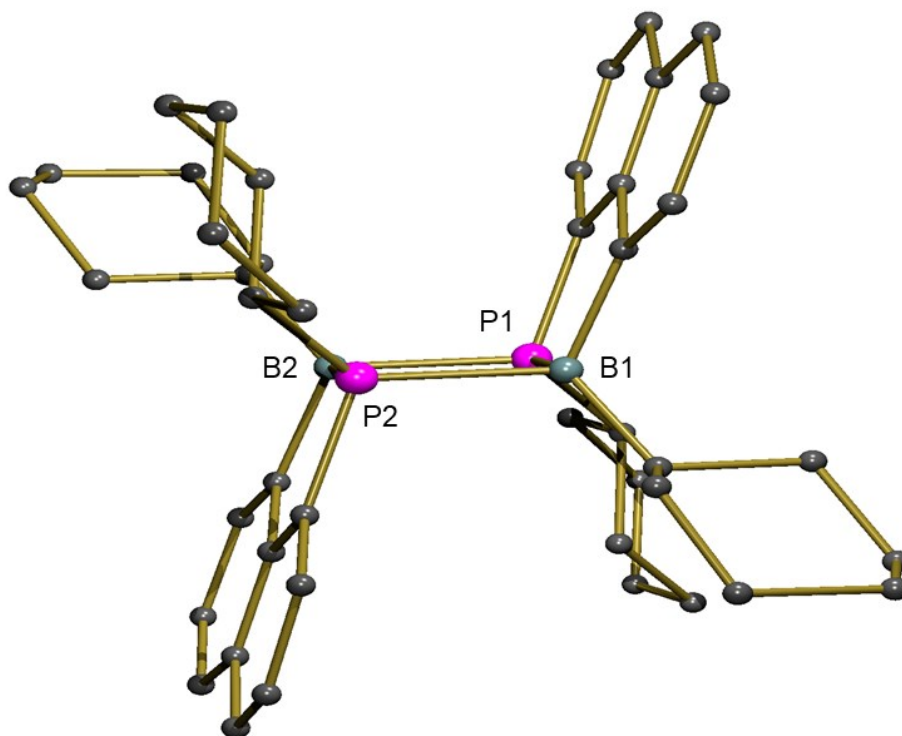

Figure S1. PovRay presentation of molecular structure of **3**. Hydrogen atoms are omitted for clarity.

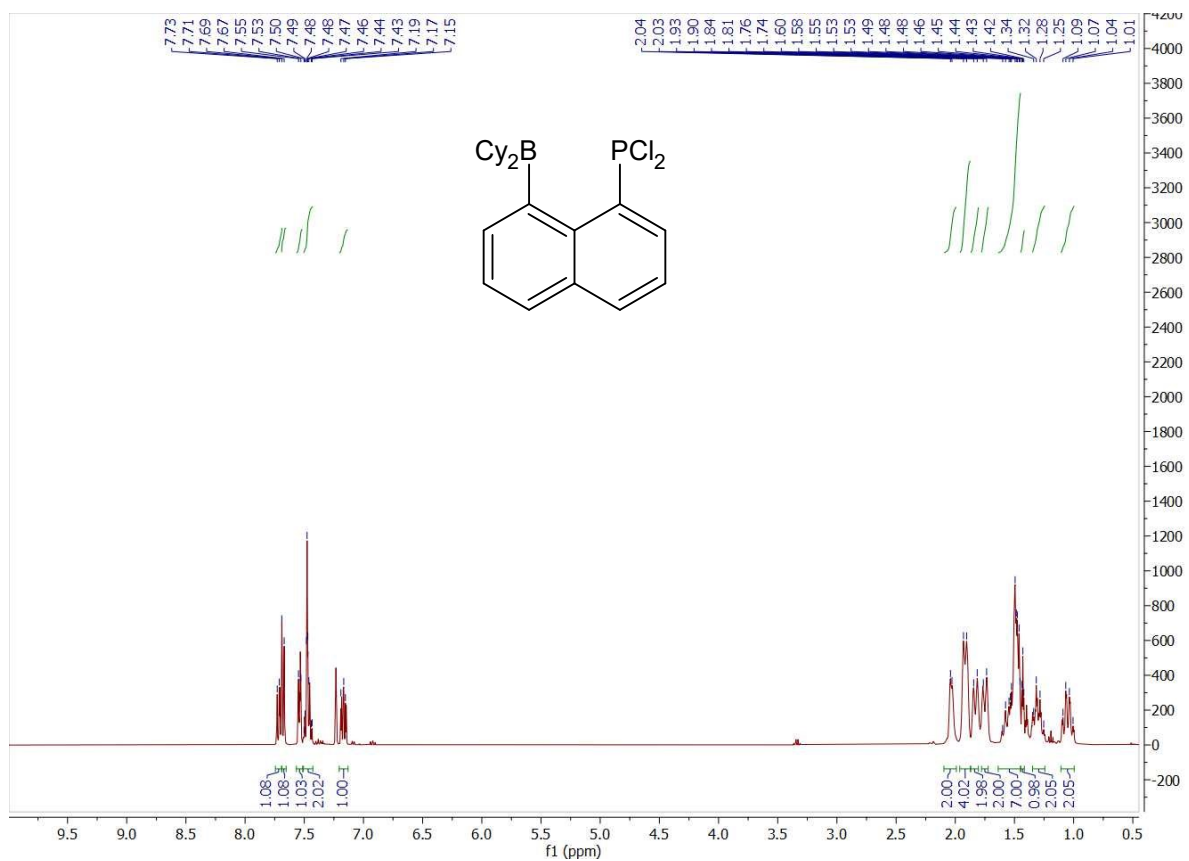

Figure S2.  $^1\text{H}$  NMR ( $\text{C}_6\text{D}_6$ , 500.13 MHz) of 1-BCy<sub>2</sub>-8-PCl<sub>2</sub>-C<sub>10</sub>H<sub>6</sub> (**1**)

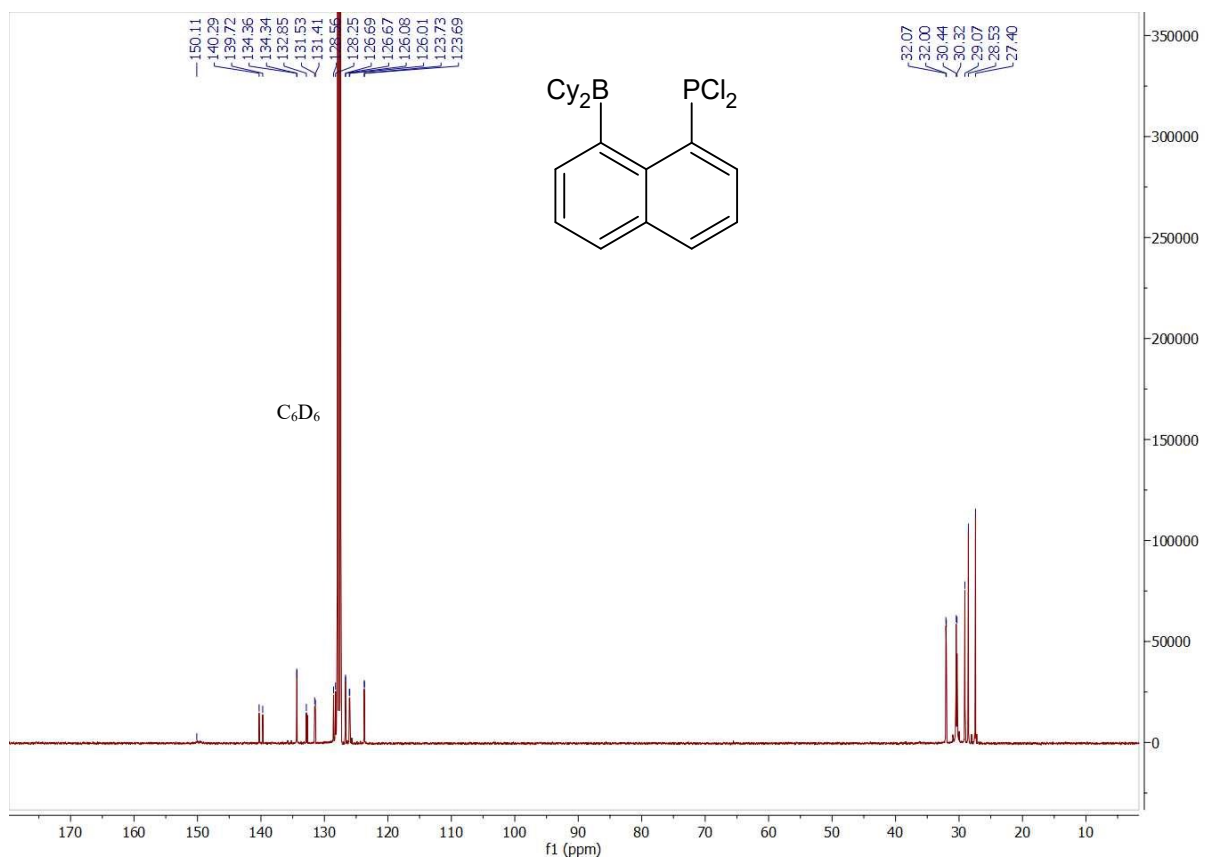

Figure S3. <sup>13</sup>C{<sup>1</sup>H} NMR (C<sub>6</sub>D<sub>6</sub>, 125.77 MHz) of 1-BCy<sub>2</sub>-8-PCl<sub>2</sub>-C<sub>10</sub>H<sub>6</sub> (**1**)

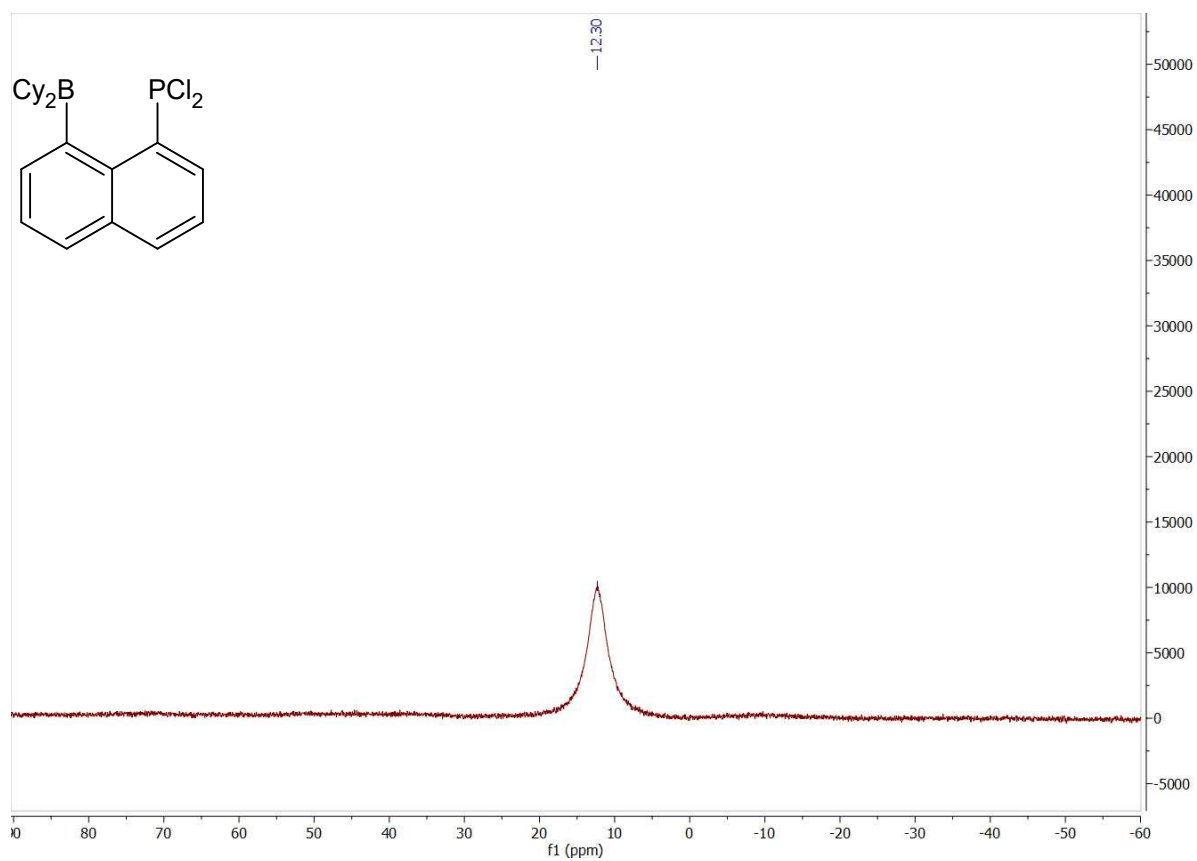

Figure S4.  $^{11}\text{B}\{^1\text{H}\}$  NMR ( $\text{C}_6\text{D}_6$ , 160.57 MHz) of 1-BCy<sub>2</sub>-8-PCl<sub>2</sub>-C<sub>10</sub>H<sub>6</sub> (**1**)

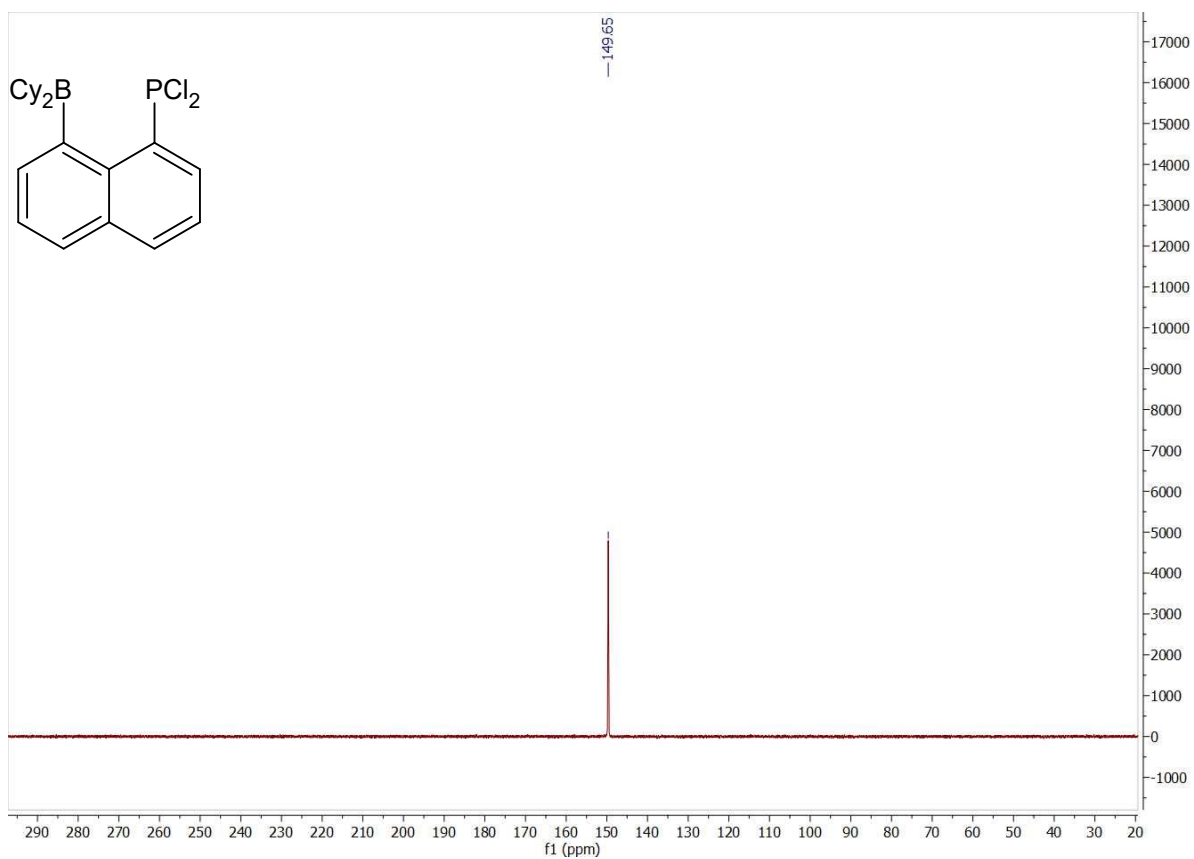

Figure S5.  $^{31}\text{P}\{^1\text{H}\}$  NMR ( $\text{C}_6\text{D}_6$ , 202.49 MHz) of 1- $\text{BCy}_2$ -8- $\text{PCl}_2$ - $\text{C}_{10}\text{H}_6$  (**1**)



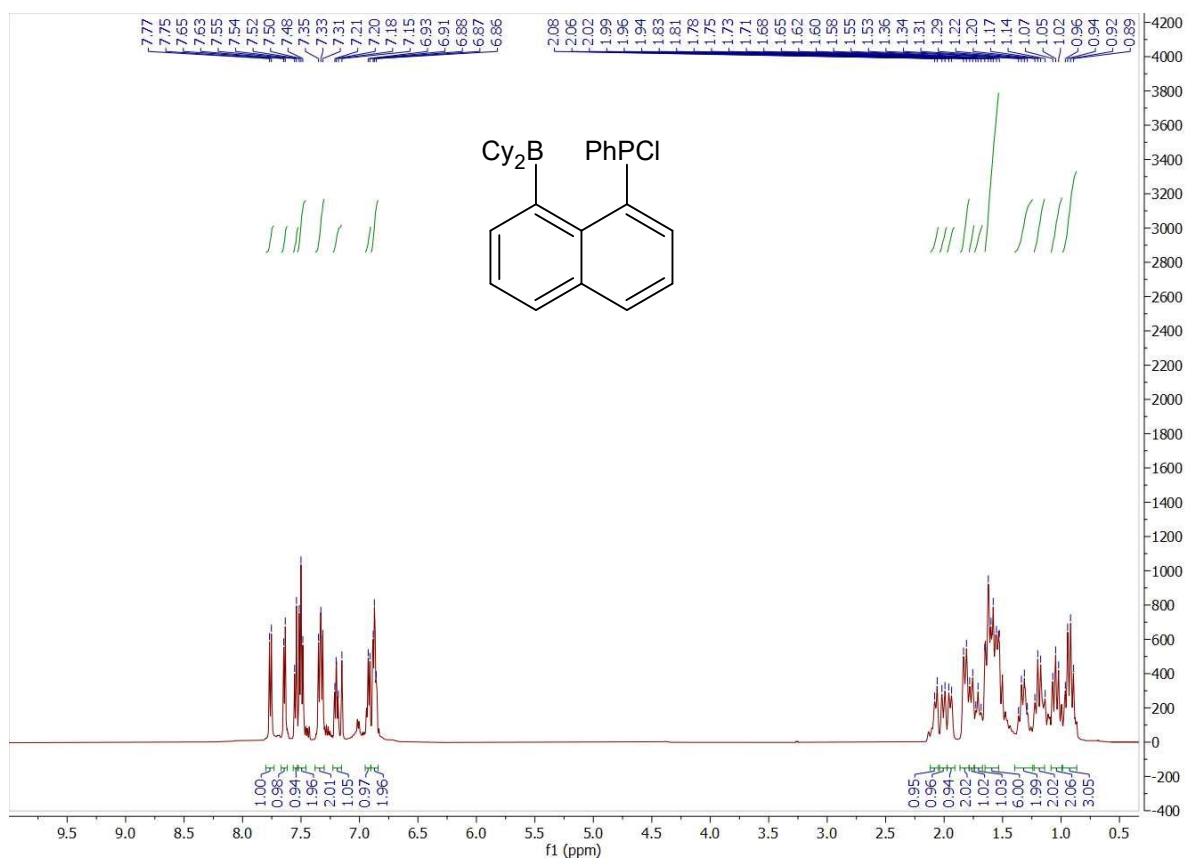

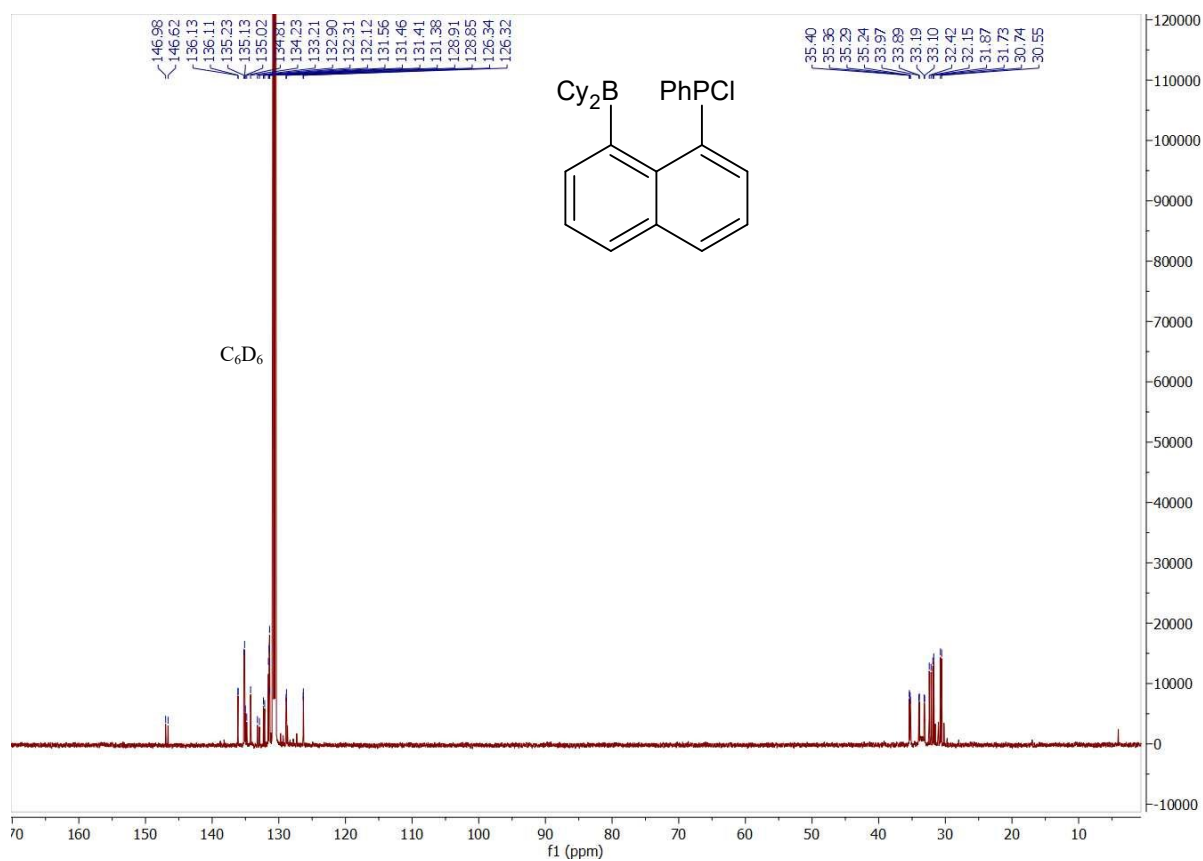

Figure S7. <sup>13</sup>C{<sup>1</sup>H} NMR (C<sub>6</sub>D<sub>6</sub>, 125.77 MHz) of 1-BCy<sub>2</sub>-8-PPhCl-C<sub>10</sub>H<sub>6</sub> (**2**)

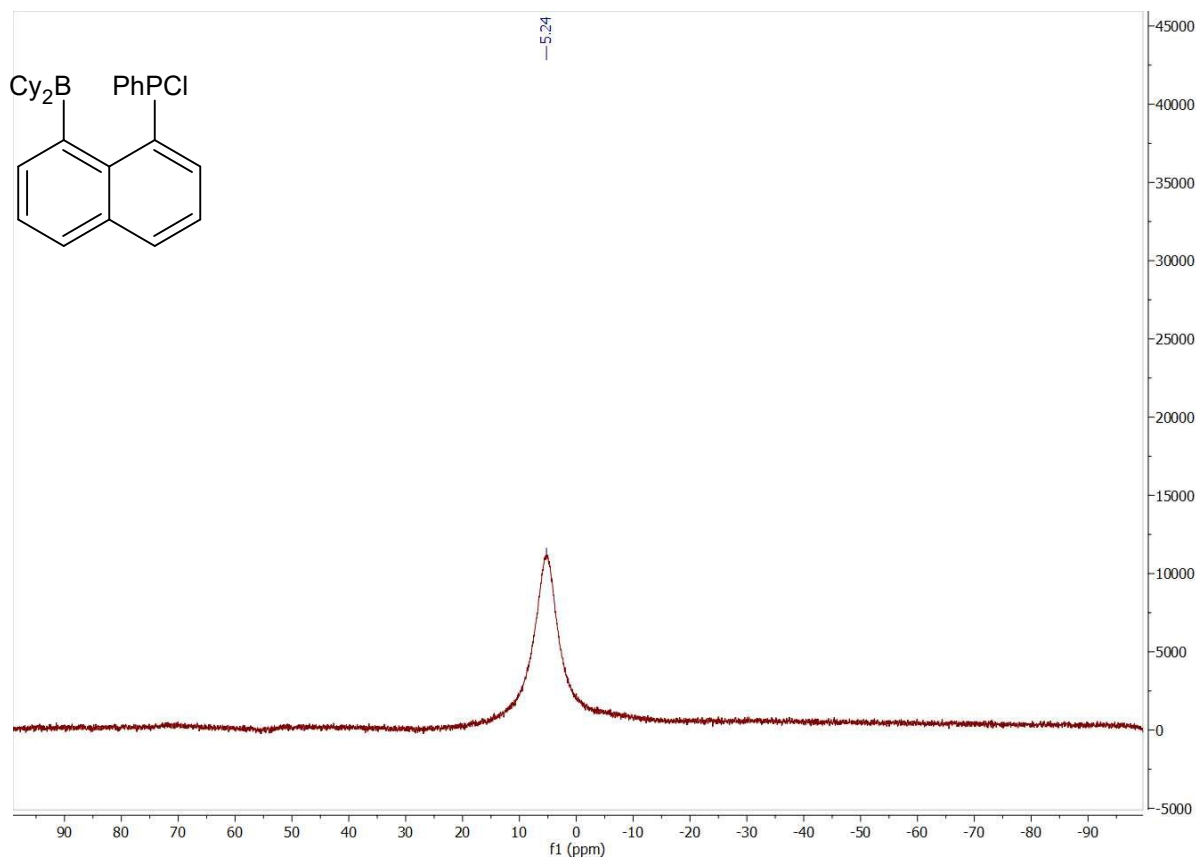

Figure S8.  $^{11}\text{B}\{^1\text{H}\}$  NMR ( $\text{C}_6\text{D}_6$ , 160.57 MHz) of 1-BCy<sub>2</sub>-8-PPhCl-C<sub>10</sub>H<sub>6</sub> (**2**)

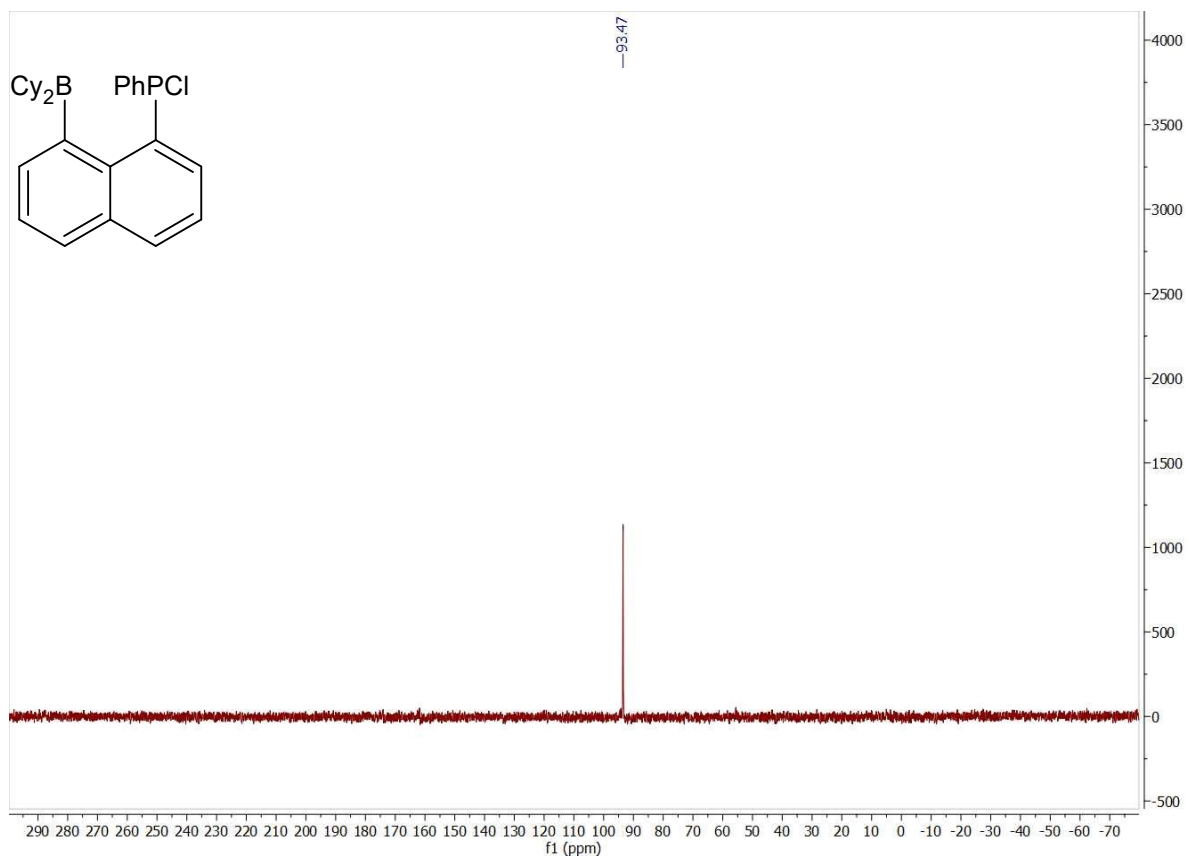

Figure S9.  $^{31}\text{P}\{^1\text{H}\}$  NMR ( $\text{C}_6\text{D}_6$ , 202.49 MHz) of 1- $\text{BCy}_2$ -8- $\text{PPhCl}$ - $\text{C}_{10}\text{H}_6$  (**2**)

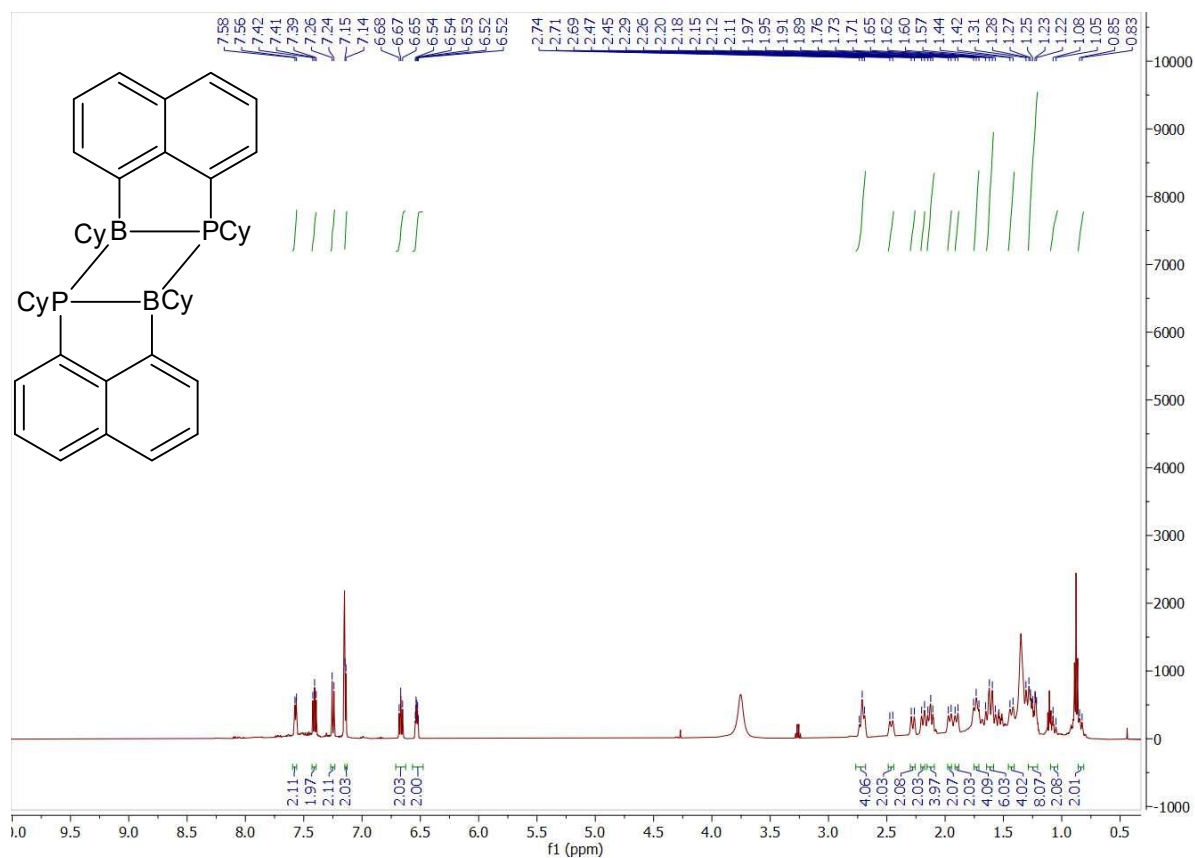

Figure S10.  $^1\text{H}$  NMR ( $\text{THF-d}_8$ , 500.13 MHz) of  $\{1\text{-BCy-8-PCy-C}_{10}\text{H}_6\}_2$  (**3**)

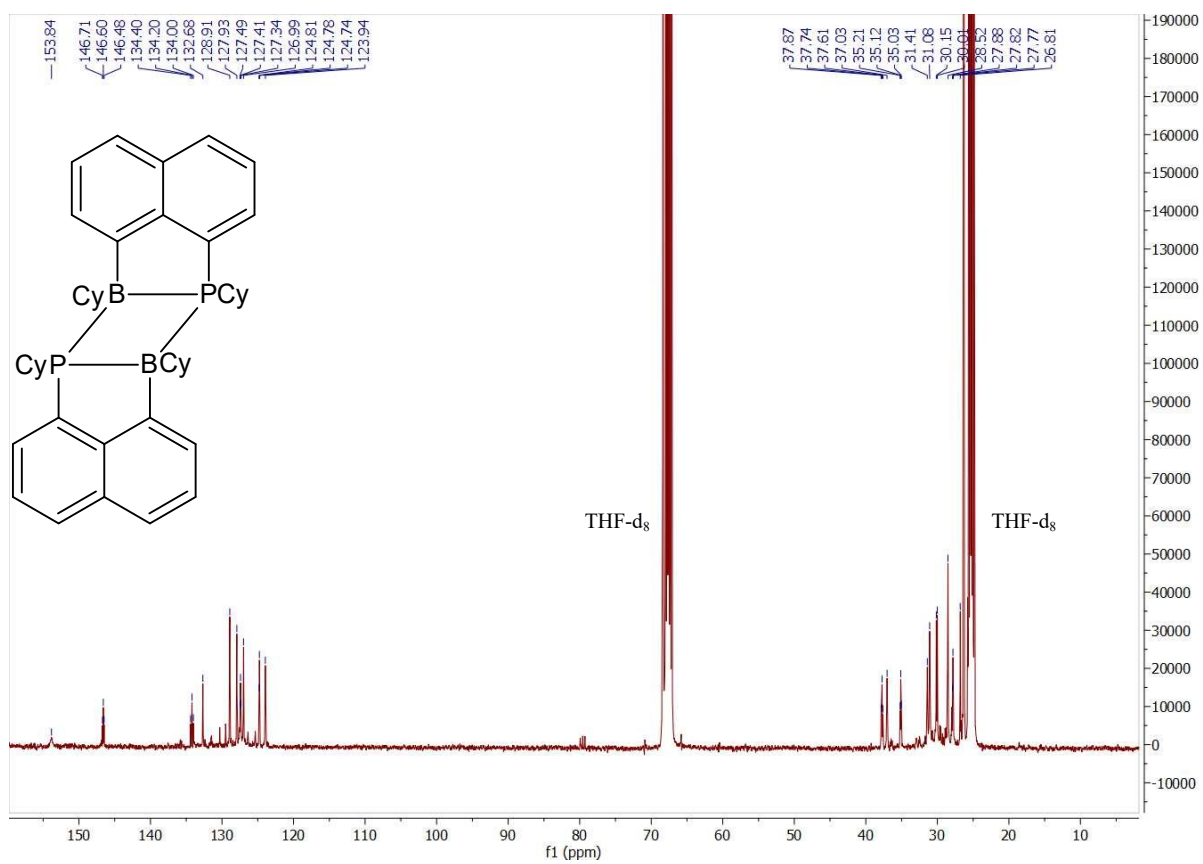

Figure S11.  $^{13}\text{C}\{^1\text{H}\}$  NMR (THF- $\text{d}_8$ , 125.77 MHz) of {1-BCy-8-PCy- $\text{C}_{10}\text{H}_6$ } $_2$  (**3**)

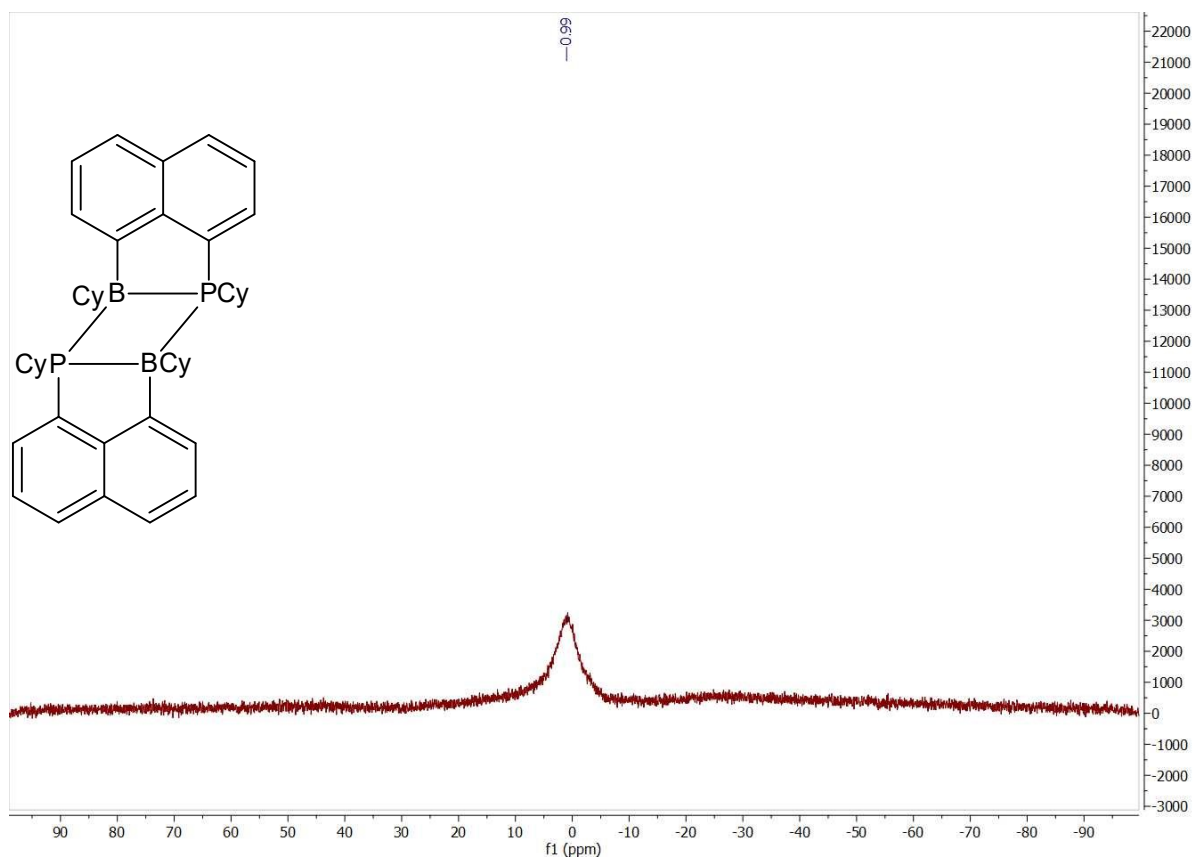

Figure S12.  $^{11}\text{B}\{^1\text{H}\}$  NMR (THF- $d_8$ , 160.57 MHz) of  $\{1\text{-BCy-8-PCy-C}_{10}\text{H}_6\}_2$  (**3**)

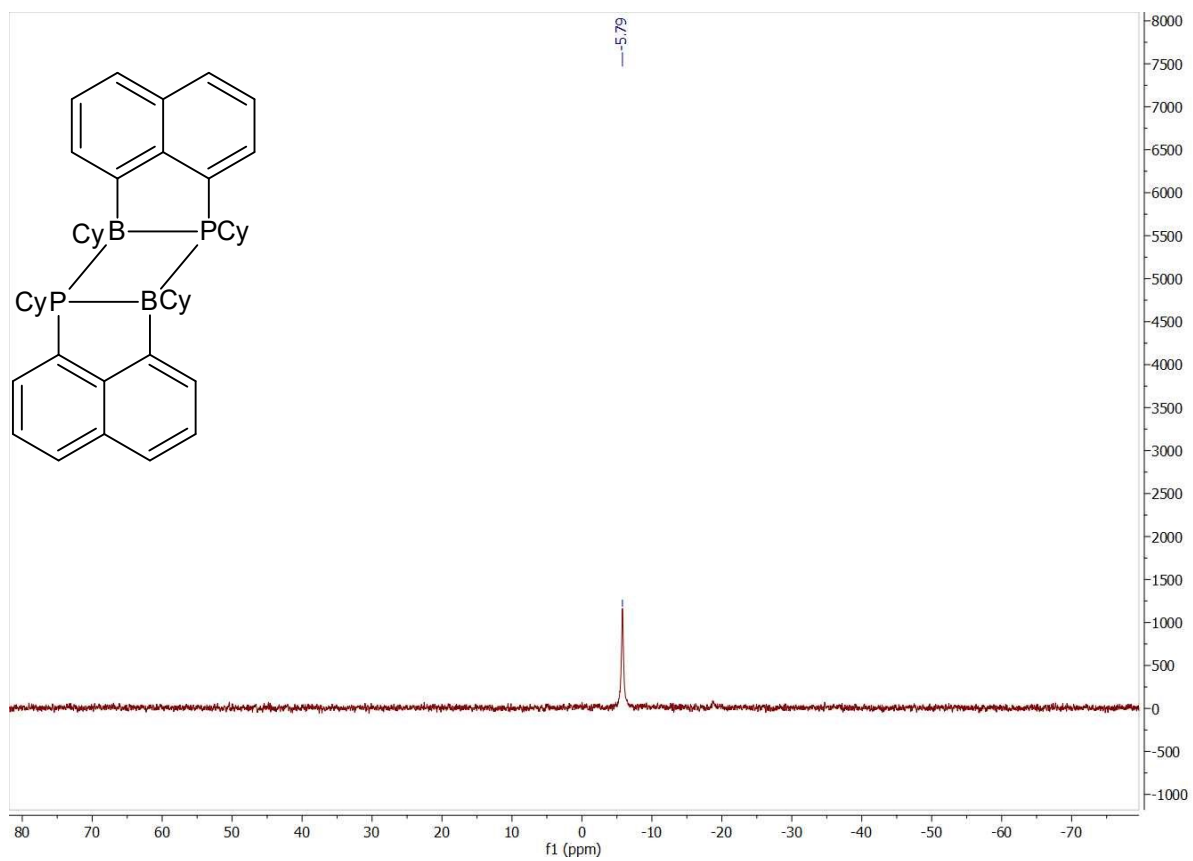

Figure S13.  $^{31}\text{P}\{^1\text{H}\}$  NMR ( $\text{THF-d}_8$ , 202.49 MHz) of  $\{1\text{-BCy-8-PCy-C}_{10}\text{H}_6\}_2$  (**3**)



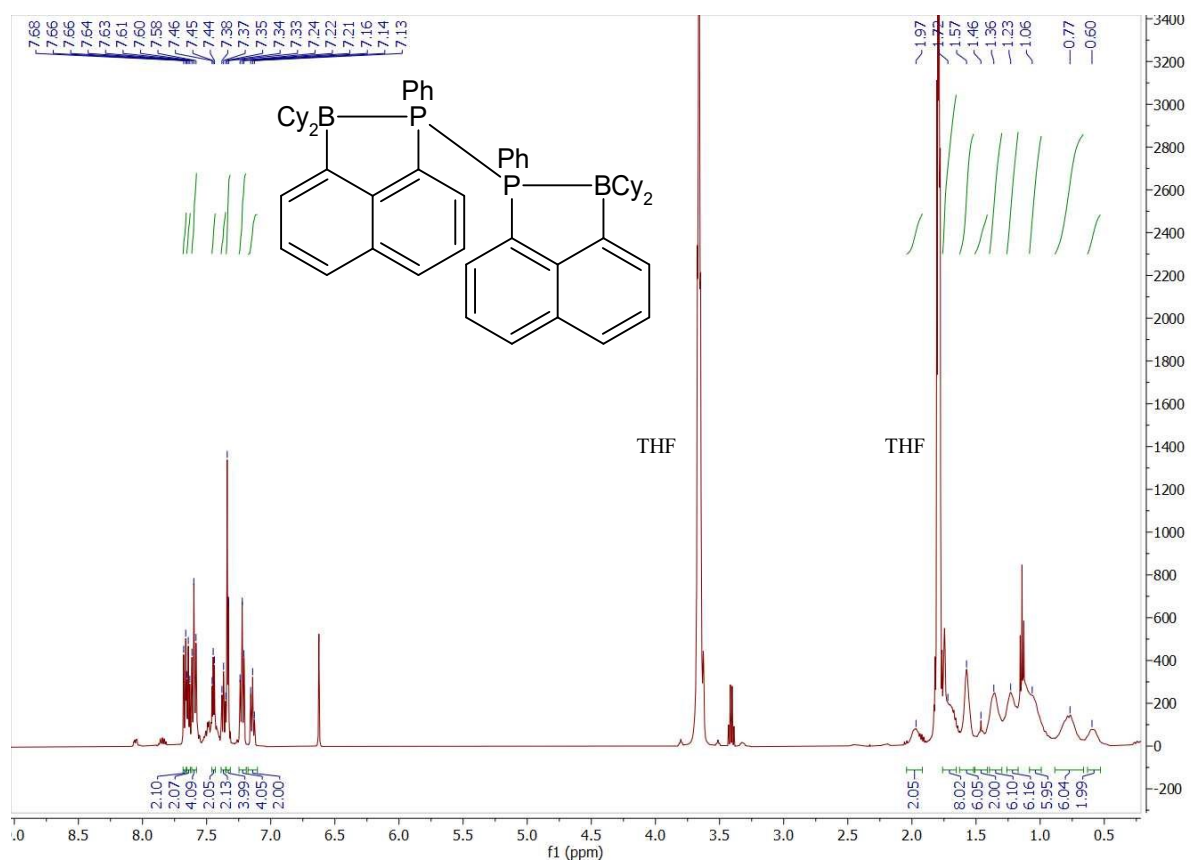

Figure S14.  $^1\text{H}$  NMR ( $\text{THF-d}_8$ , 500.13 MHz) of  $\{1\text{-BCy}_2\text{-}8\text{-PPh-C}_{10}\text{H}_6\}_2$  (**4**)

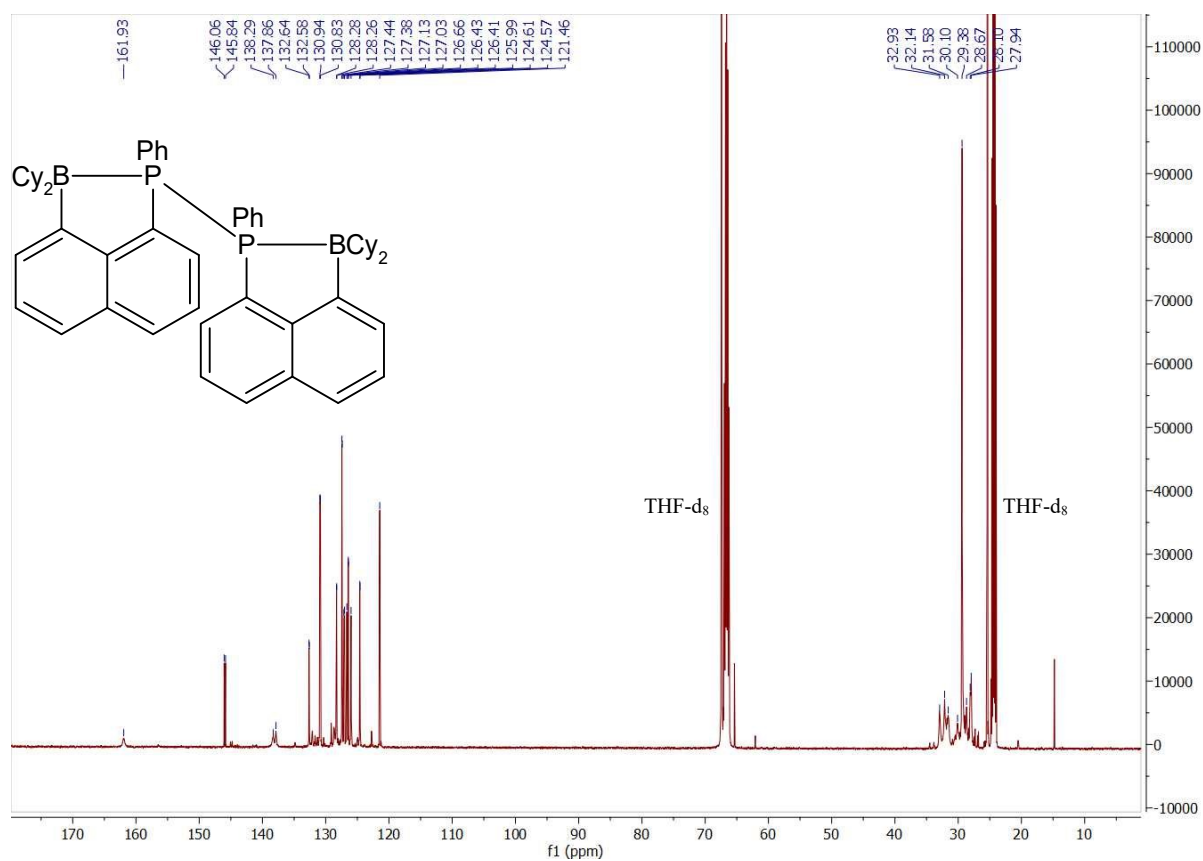

Figure S15. <sup>13</sup>C{<sup>1</sup>H} NMR (THF-d<sub>8</sub>, 125.77 MHz) of {1-BCy<sub>2</sub>-8-PPh-C<sub>10</sub>H<sub>6</sub>}<sub>2</sub> (**4**)

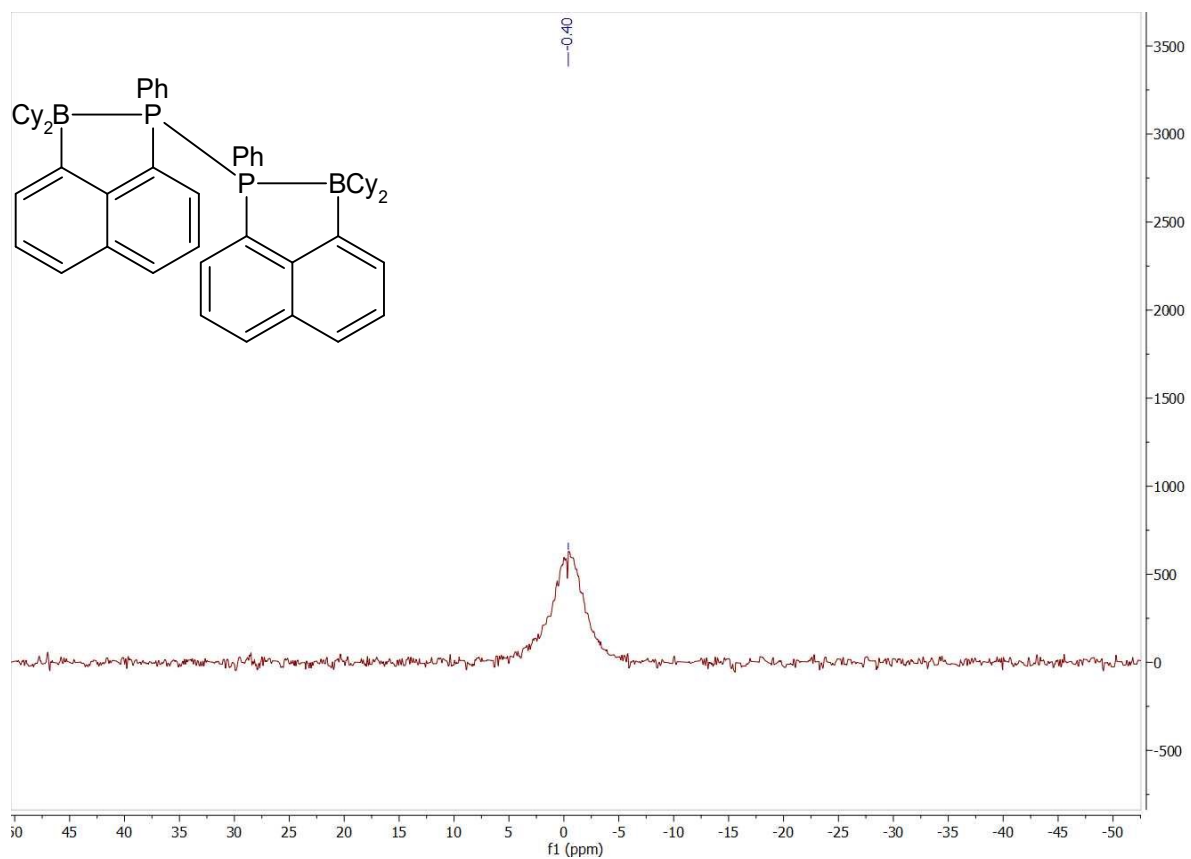

Figure S16.  $^{11}\text{B}\{^1\text{H}\}$  NMR ( $\text{THF-d}_8$ , 160.57 MHz) of  $\{1\text{-BCy}_2\text{-8-PPh-C}_{10}\text{H}_6\}_2$  (**4**)

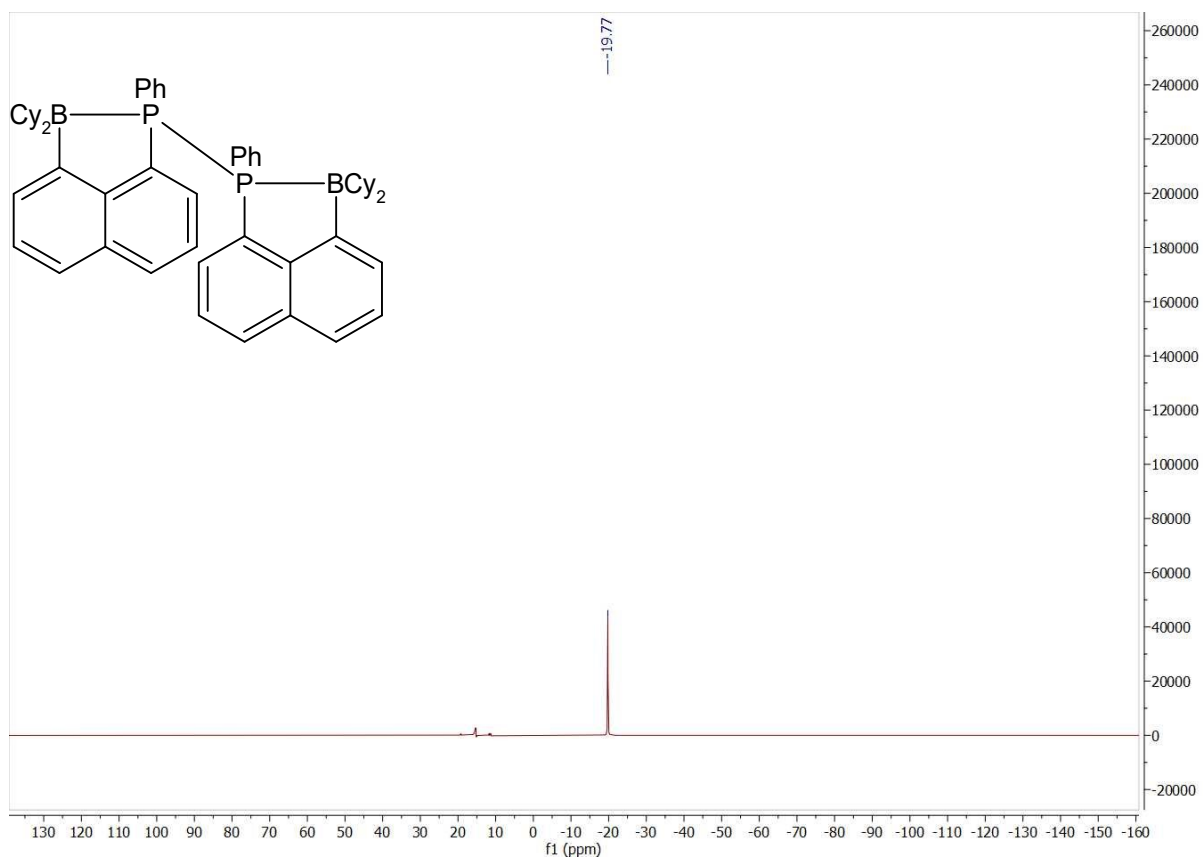

Figure S17.  $^{31}\text{P}\{^1\text{H}\}$  NMR (THF- $d_8$ , 202.49 MHz) of {1-BCy<sub>2</sub>-8-PPh-C<sub>10</sub>H<sub>6</sub>}<sub>2</sub> (**4**)

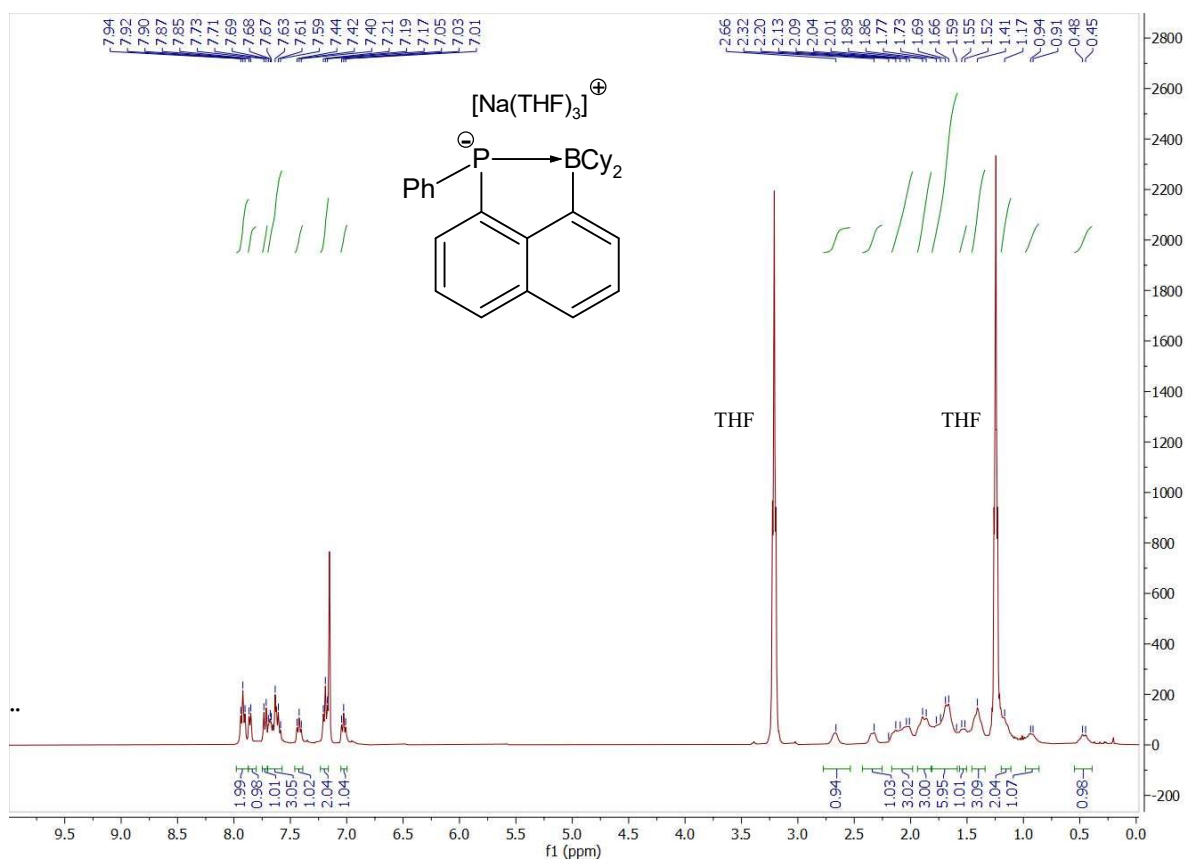

Figure S18.  $^1\text{H}$  NMR ( $\text{THF-d}_8$ , 500.13 MHz) of  $[\text{Na}(\text{THF})_3]^+ [\text{1-BCy}_2\text{-8-PPh-C}_{10}\text{H}_6]^-$  (5)

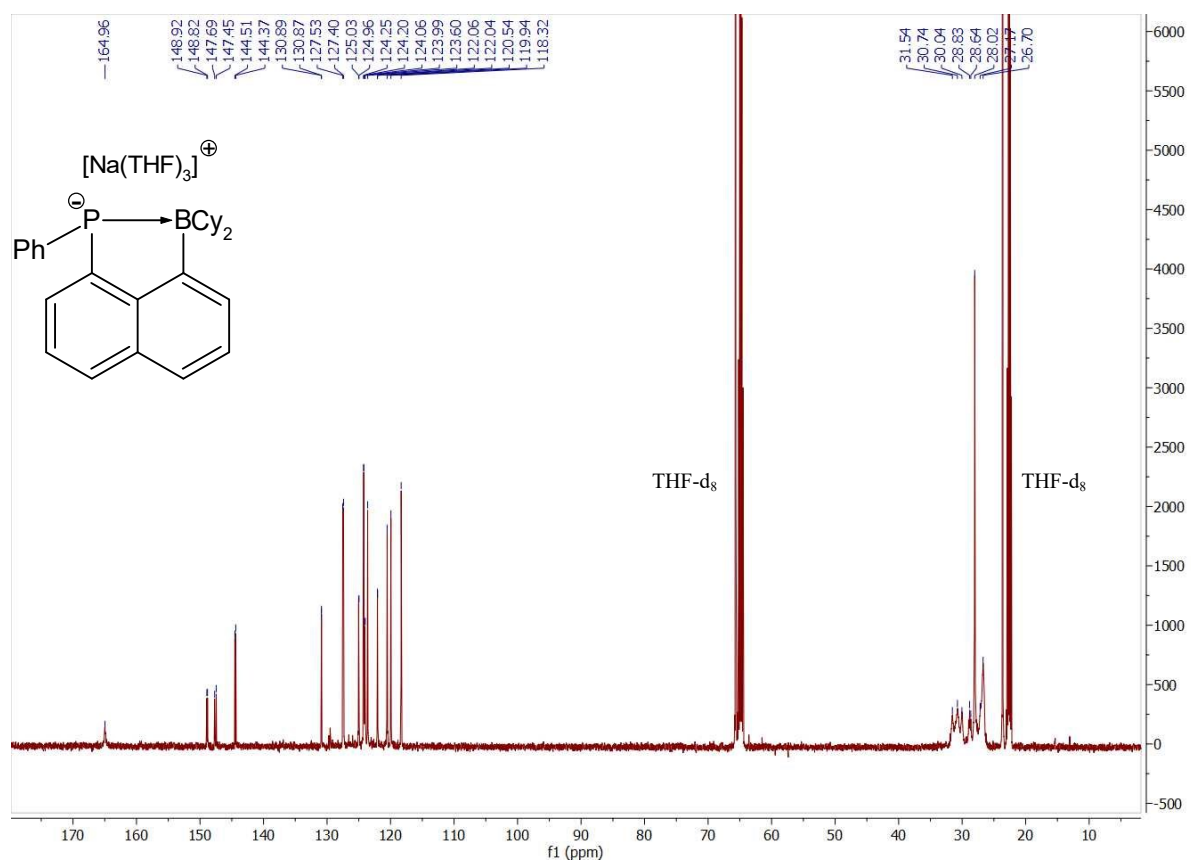

Figure S19.  $^{13}\text{C}\{^1\text{H}\}$  NMR (THF- $d_8$ , 125.77 MHz) of  $[\text{Na}(\text{THF})_3]^+ [1\text{-BCy}_2\text{-8-PPh-C}_{10}\text{H}_6]^-$  (**5**)

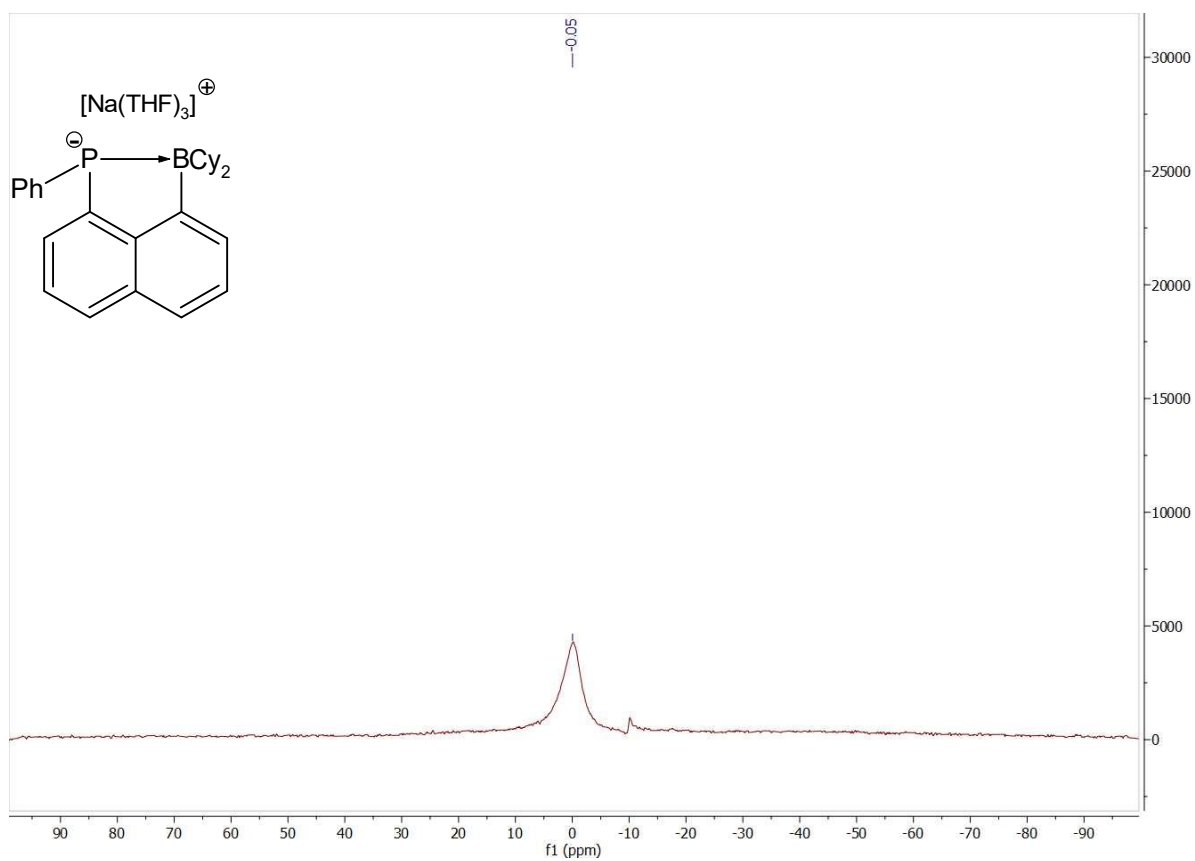

Figure S20.  $^{11}\text{B}\{^1\text{H}\}$  NMR ( $\text{THF-d}_8$ , 160.57 MHz) of  $[\text{Na}(\text{THF})_3]^+ [1\text{-BCy}_2\text{-8-PPh-C}_{10}\text{H}_6]^-$  (**5**)

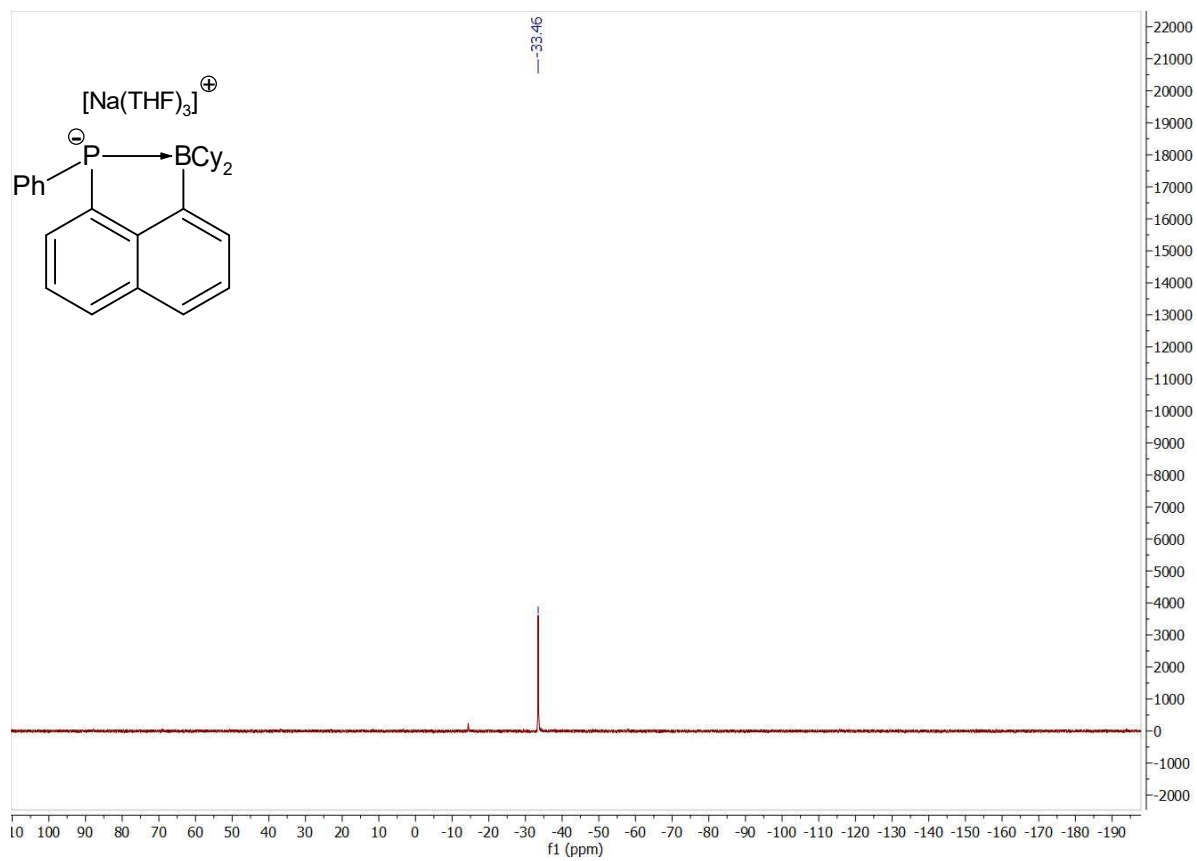

Figure S21.  $^{31}\text{P}\{^1\text{H}\}$  NMR ( $\text{THF-d}_8$ , 202.49 MHz) of  $[\text{Na}(\text{THF})_3]^+ [1\text{-BCy}_2\text{-8-PPh-C}_{10}\text{H}_6]^-$  (**5**)



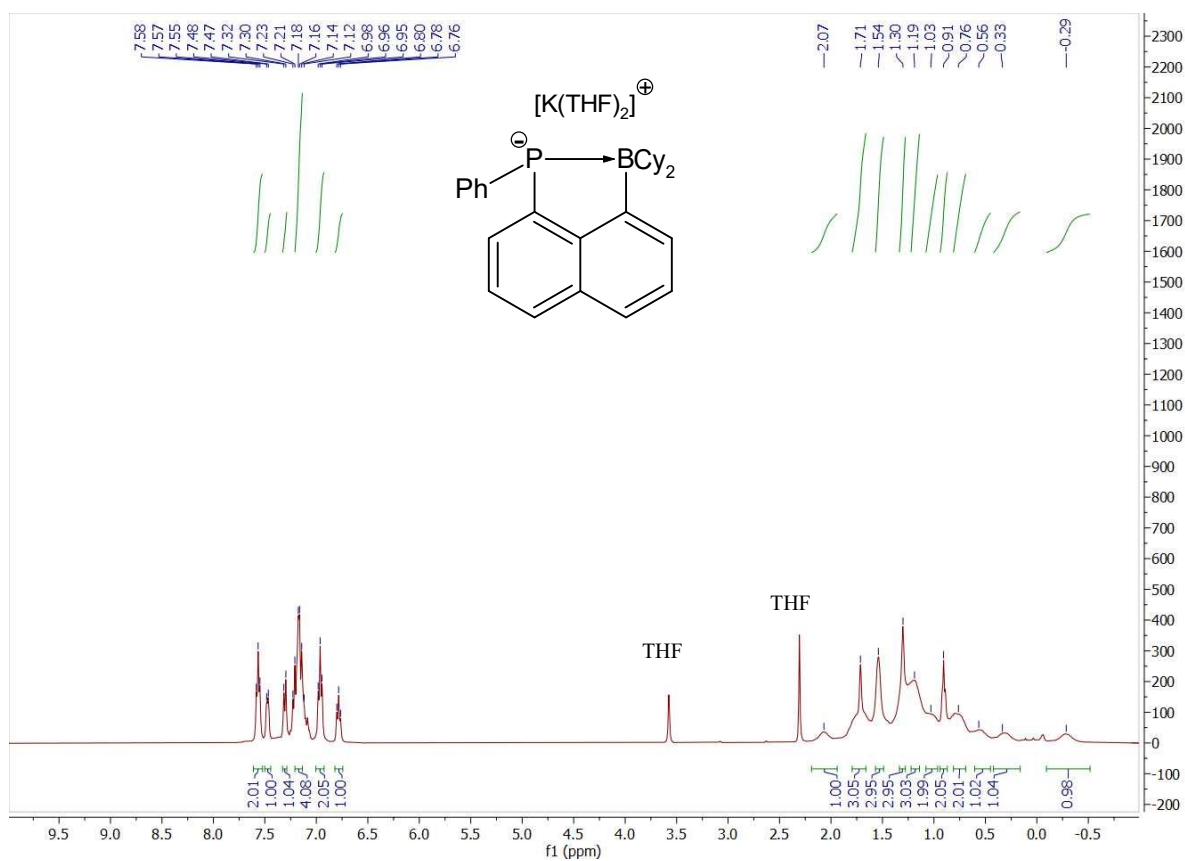

Figure S22. <sup>1</sup>H NMR (THF-d<sub>8</sub>, 500.13 MHz) of  $\{[K(THF)_2]^+ [1-BCy_2-8-PPh-C_{10}H_6]^- \}_\infty$  (**6**)

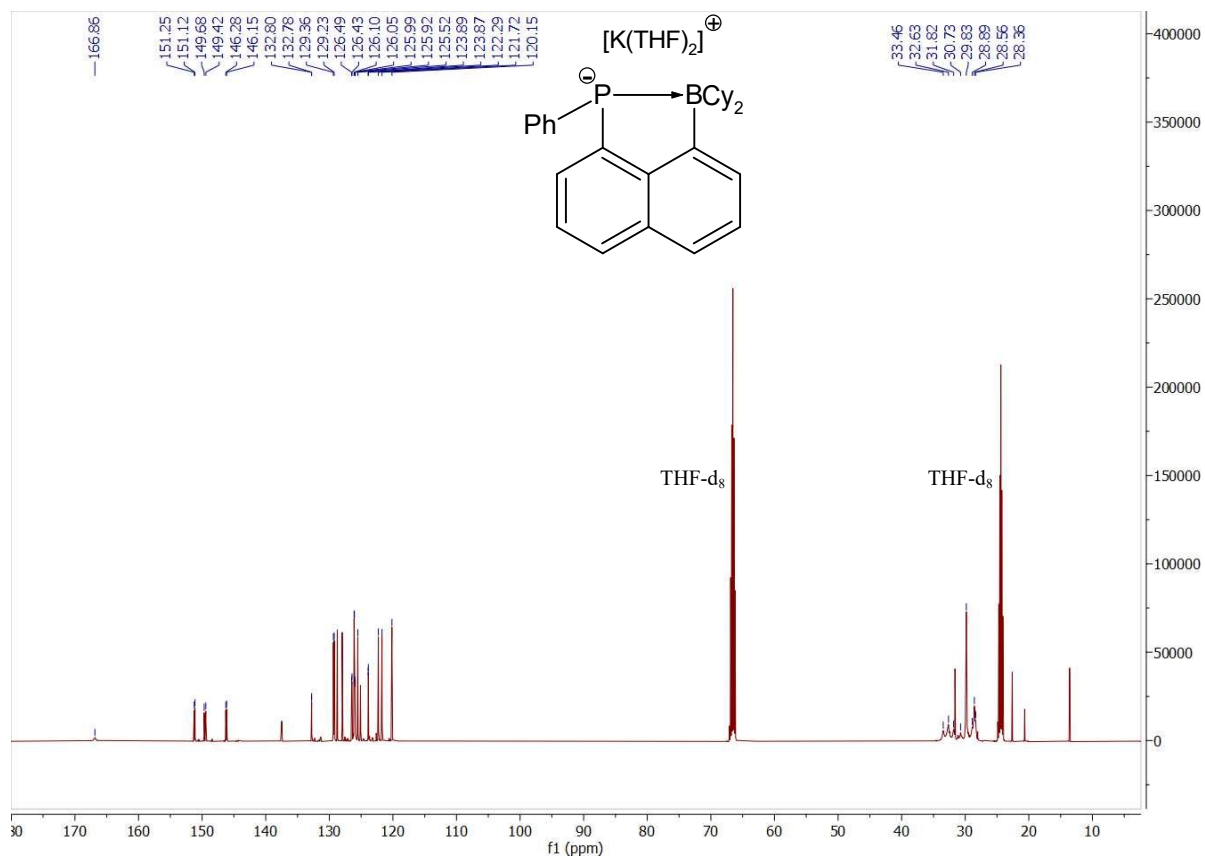

Figure S23.  $^{13}\text{C}\{^1\text{H}\}$  NMR (THF- $d_8$ , 125.77 MHz) of  $\{[\text{K}(\text{THF})_2]^+ [1\text{-BCy}_2\text{-8-PPH-C}_{10}\text{H}_6]^- \}_\infty$  (**6**)

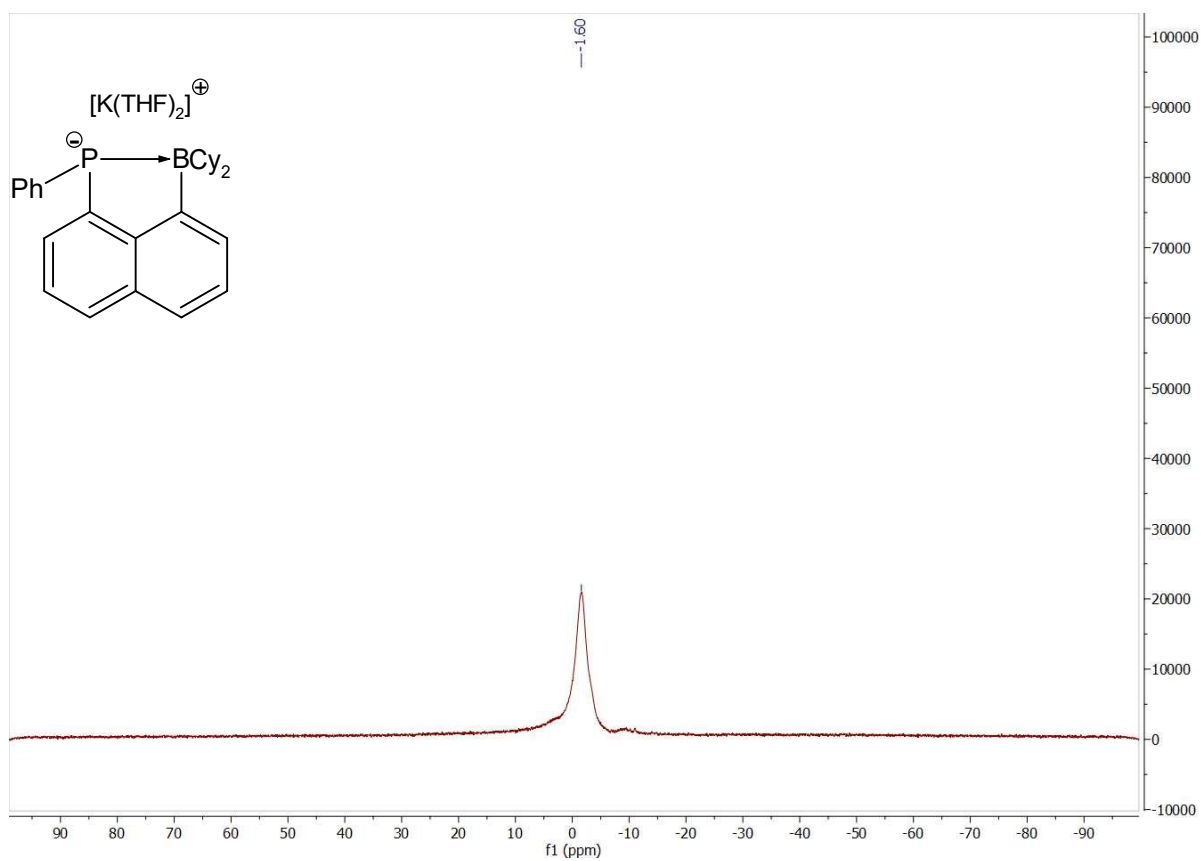

Figure S24.  $^{11}\text{B}\{^1\text{H}\}$  NMR ( $\text{THF-d}_8$ , 160.57 MHz) of  $\{[\text{K}(\text{THF})_2]^+ [1\text{-BCy}_2\text{-8-PPH-C}_{10}\text{H}_6]^\ominus\}_\infty$  (**6**)

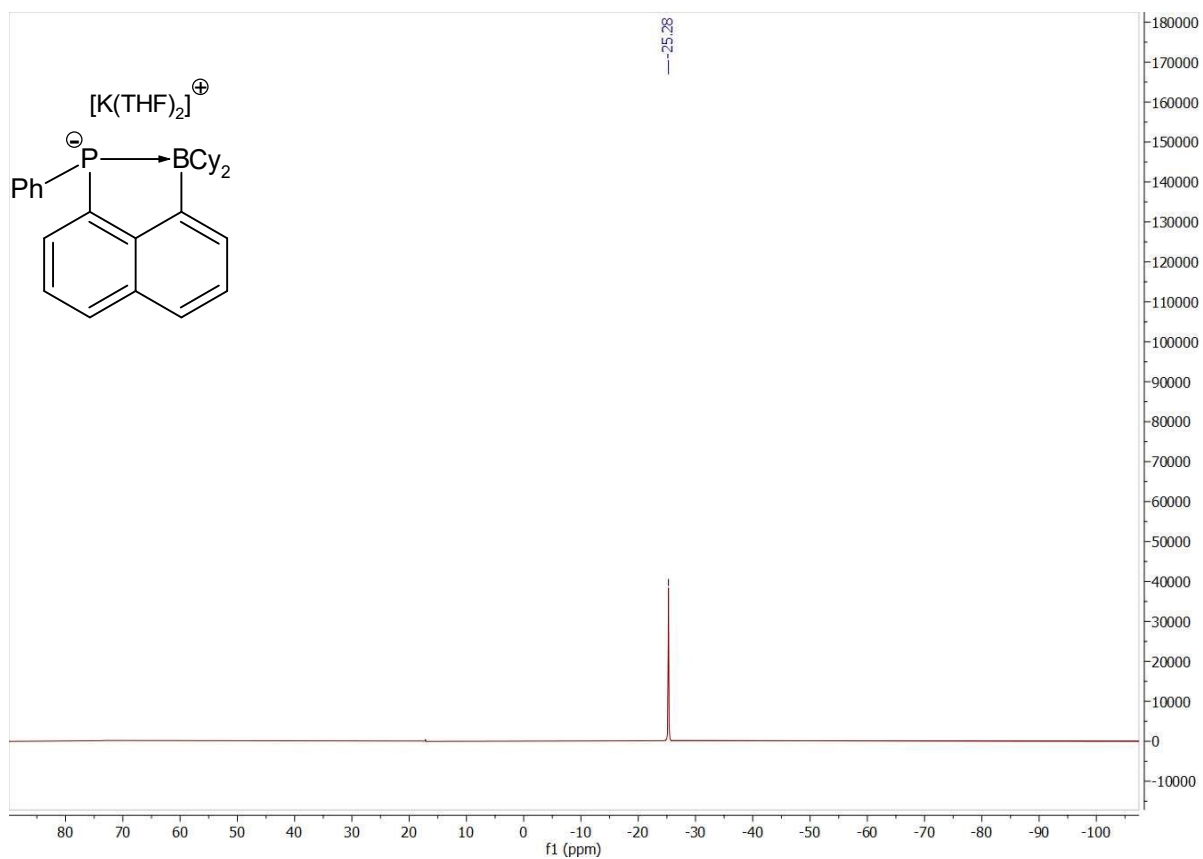

Figure S25.  $^{31}\text{P}\{^1\text{H}\}$  NMR ( $\text{THF-d}_8$ , 202.49 MHz) of  $\{[\text{K}(\text{THF})_2]^+ [1\text{-BCy}_2\text{-8-PPH-C}_{10}\text{H}_6]^\ominus\}_\infty$  (**6**)

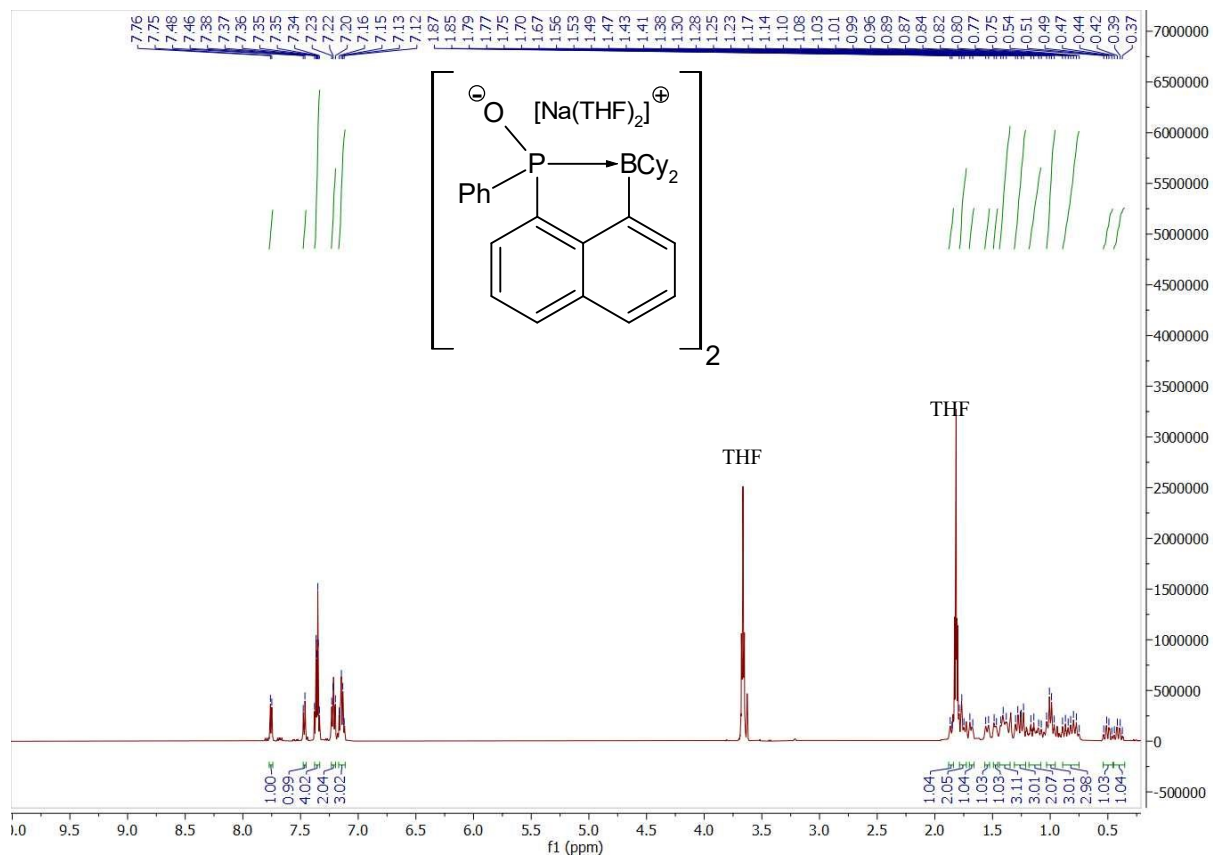

Figure S26.  $^1\text{H}$  NMR ( $\text{THF}-d_8$ , 500.13 MHz) of  $\{[\text{Na}(\text{THF})_2]^+ [1\text{-BCy}_2\text{-8-P(O)Ph-C}_{10}\text{H}_6]\}_2$  (**7**)

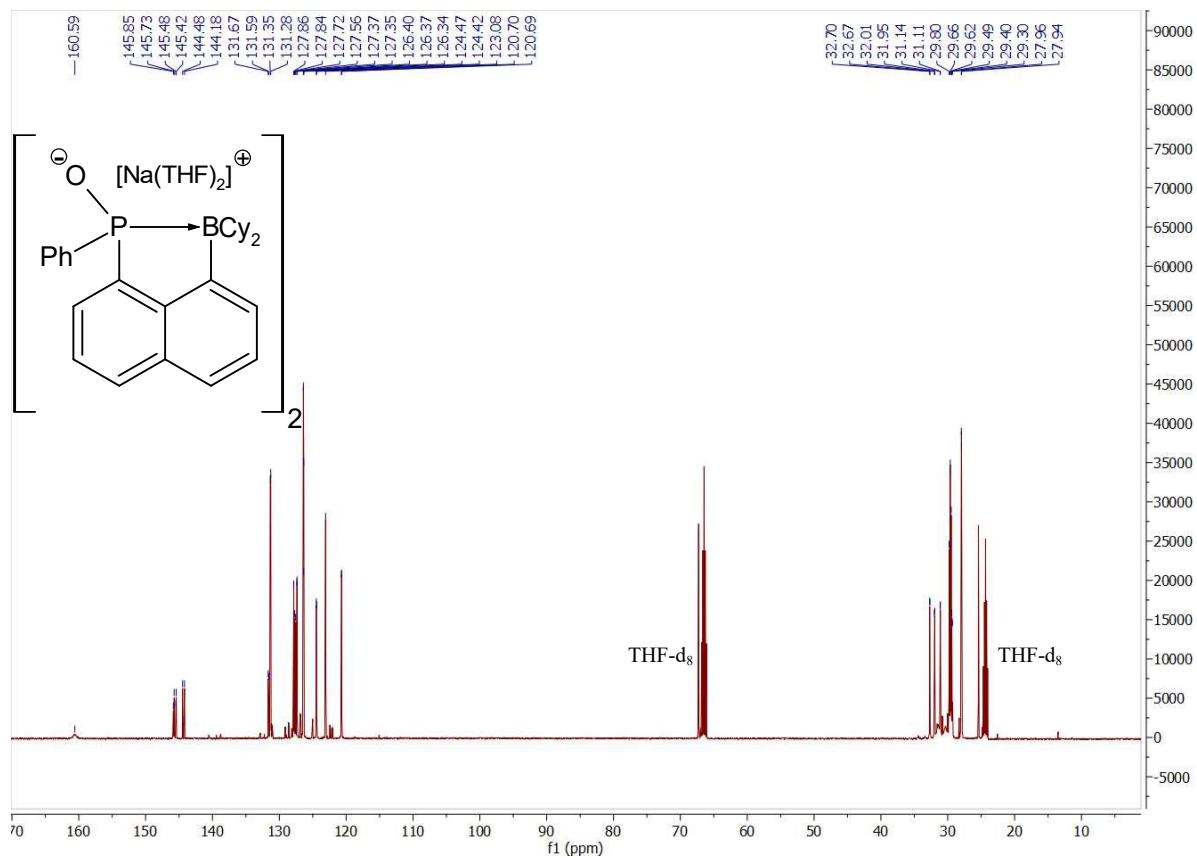

Figure S27.  $^{13}\text{C}\{^1\text{H}\}$  NMR ( $\text{THF-d}_8$ , 125.77 MHz) of  $\{[\text{Na}(\text{THF})_2]^+ [1\text{-BCy}_2\text{-8-P(O)Ph-C}_{10}\text{H}_6]_2\}^-$  (**7**)

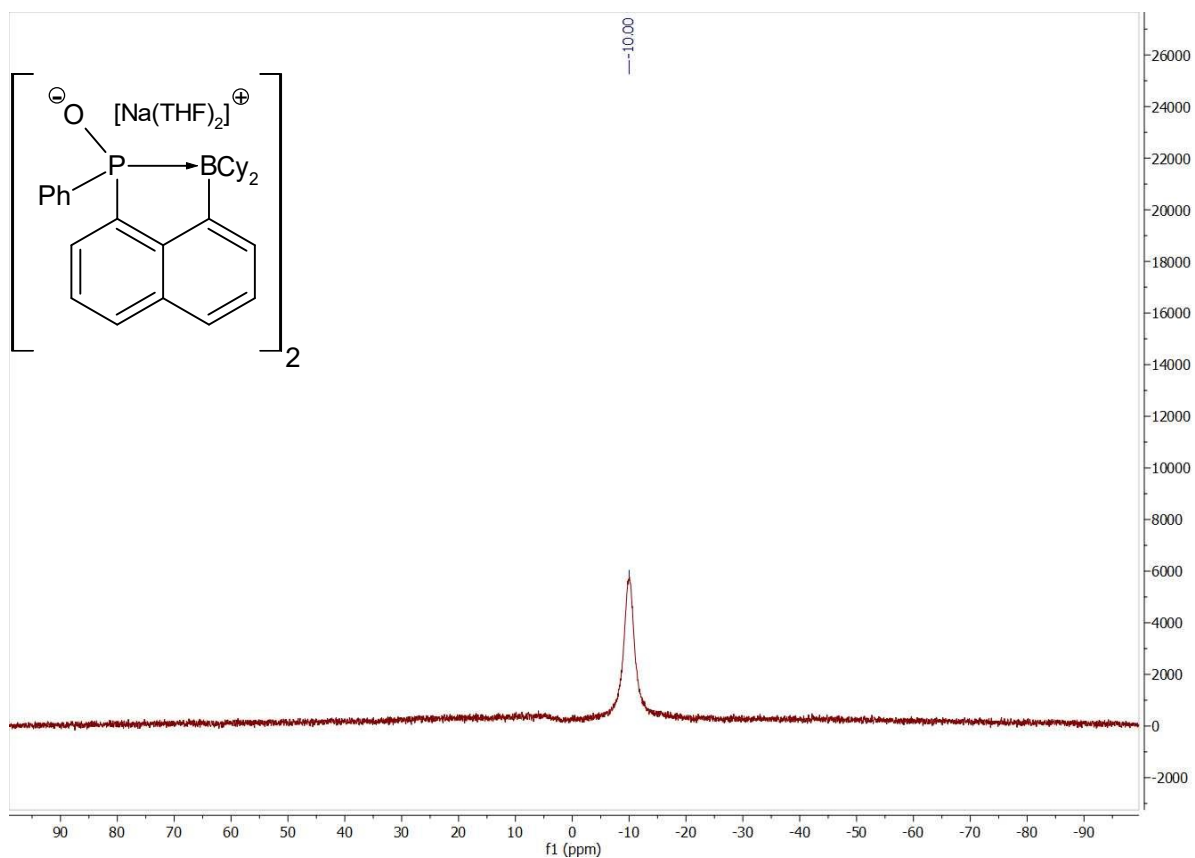

Figure S28.  $^{11}\text{B}\{^1\text{H}\}$  NMR ( $\text{THF-d}_8$ , 160.57 MHz) of  $\{[\text{Na}(\text{THF})_2]^+ [1\text{-BCy}_2\text{-8-P}(\text{O})\text{Ph-C}_{10}\text{H}_6]^- \}_2$  (7)

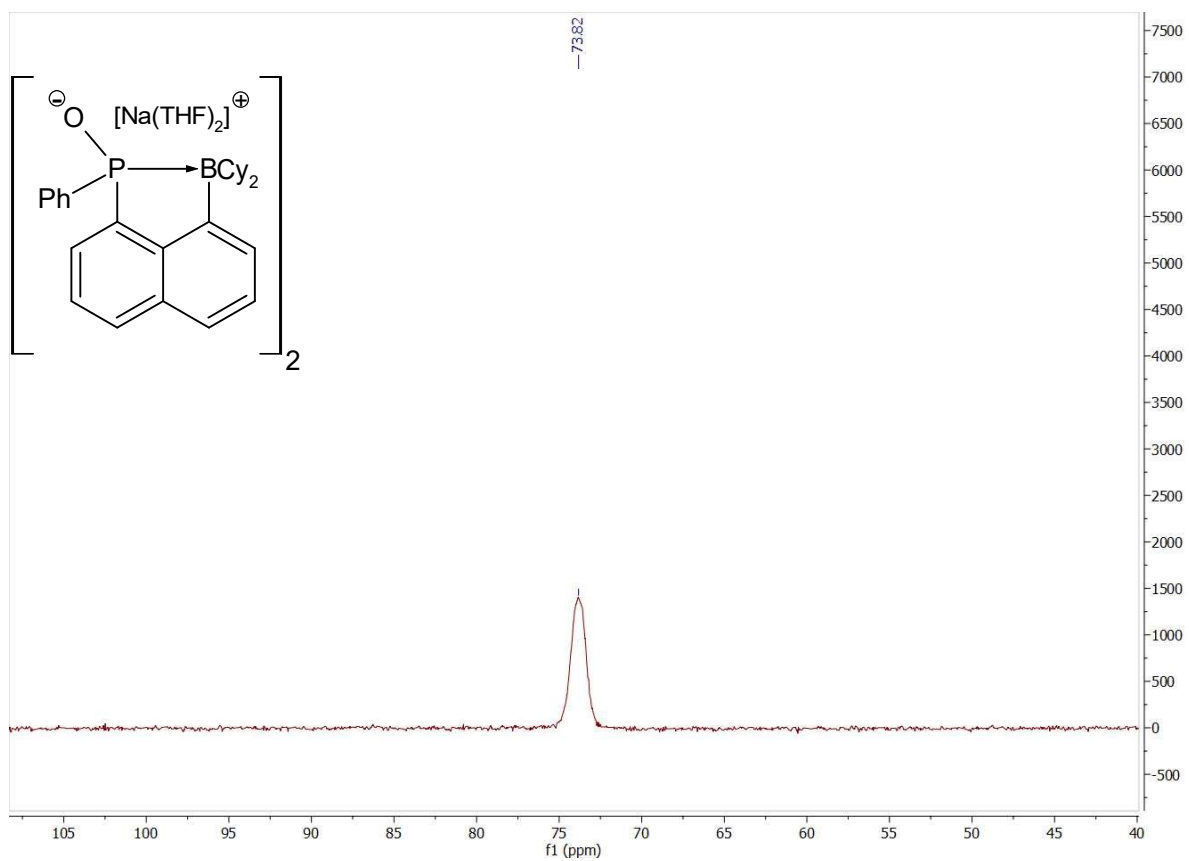

Figure S29.  $^{31}\text{P}\{^1\text{H}\}$  NMR ( $\text{THF-d}_8$ , 202.49 MHz) of  $\{[\text{Na}(\text{THF})_2]^+ [1\text{-BCy}_2\text{-8-P(O)Ph-C}_{10}\text{H}_6]^- \}_2$  (7)



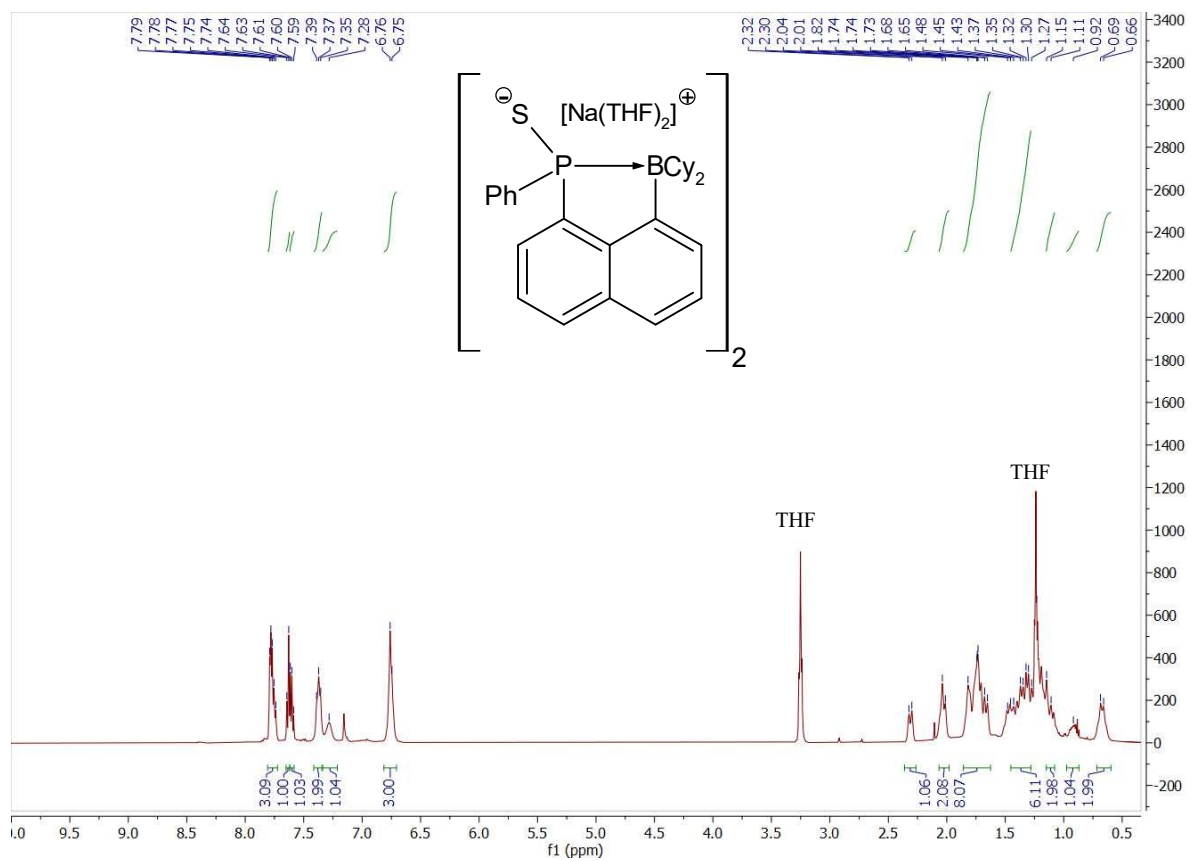

Figure S30. <sup>1</sup>H NMR (C<sub>6</sub>D<sub>6</sub>, 500.13 MHz) of {[Na(THF)<sub>2</sub>]<sup>+</sup> [1-BCy<sub>2</sub>-8-P(S)Ph-C<sub>10</sub>H<sub>6</sub>]<sup>-</sup>]<sub>2</sub> (**8**)

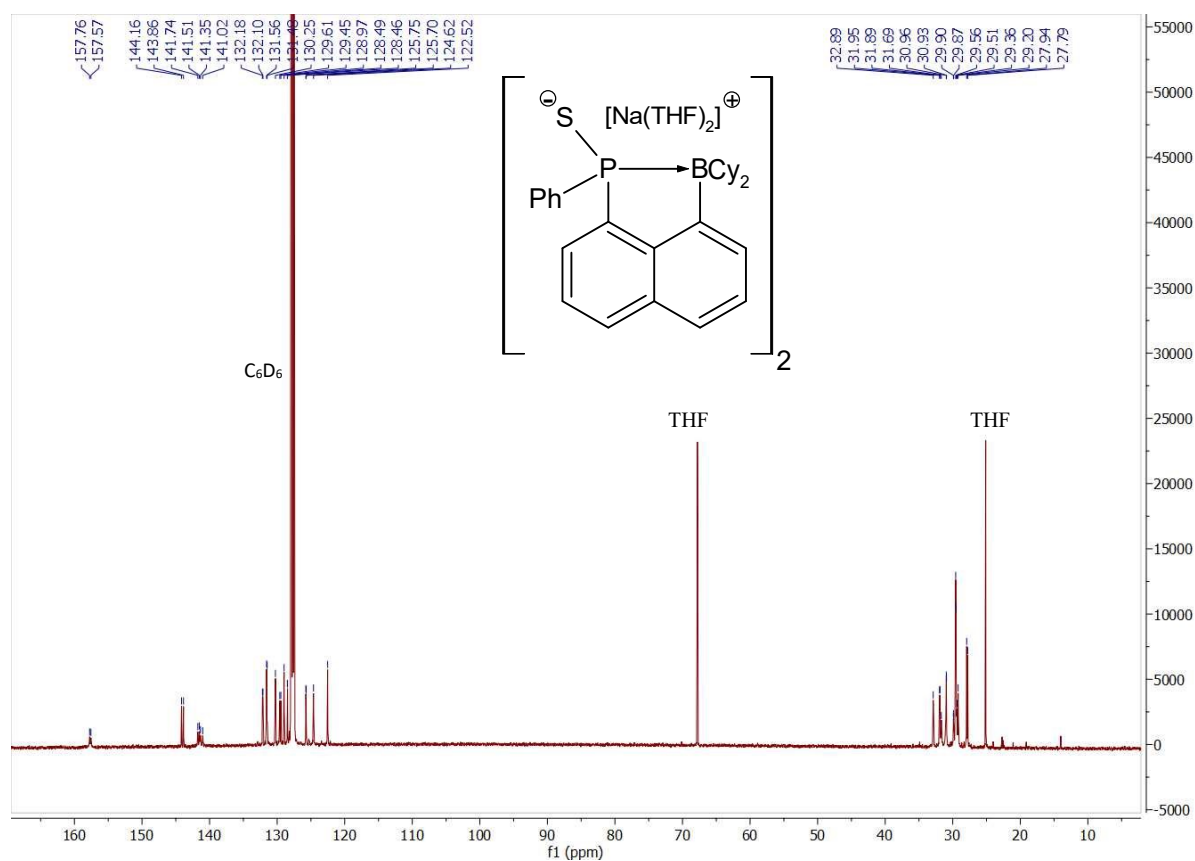

Figure S31.  $^{13}\text{C}\{^1\text{H}\}$  NMR ( $\text{C}_6\text{D}_6$ , 125.77 MHz) of  $\{[\text{Na}(\text{THF})_2]^+ [1\text{-BCy}_2\text{-8-P(S)Ph-C}_{10}\text{H}_6]^- \}_2$  (**8**)

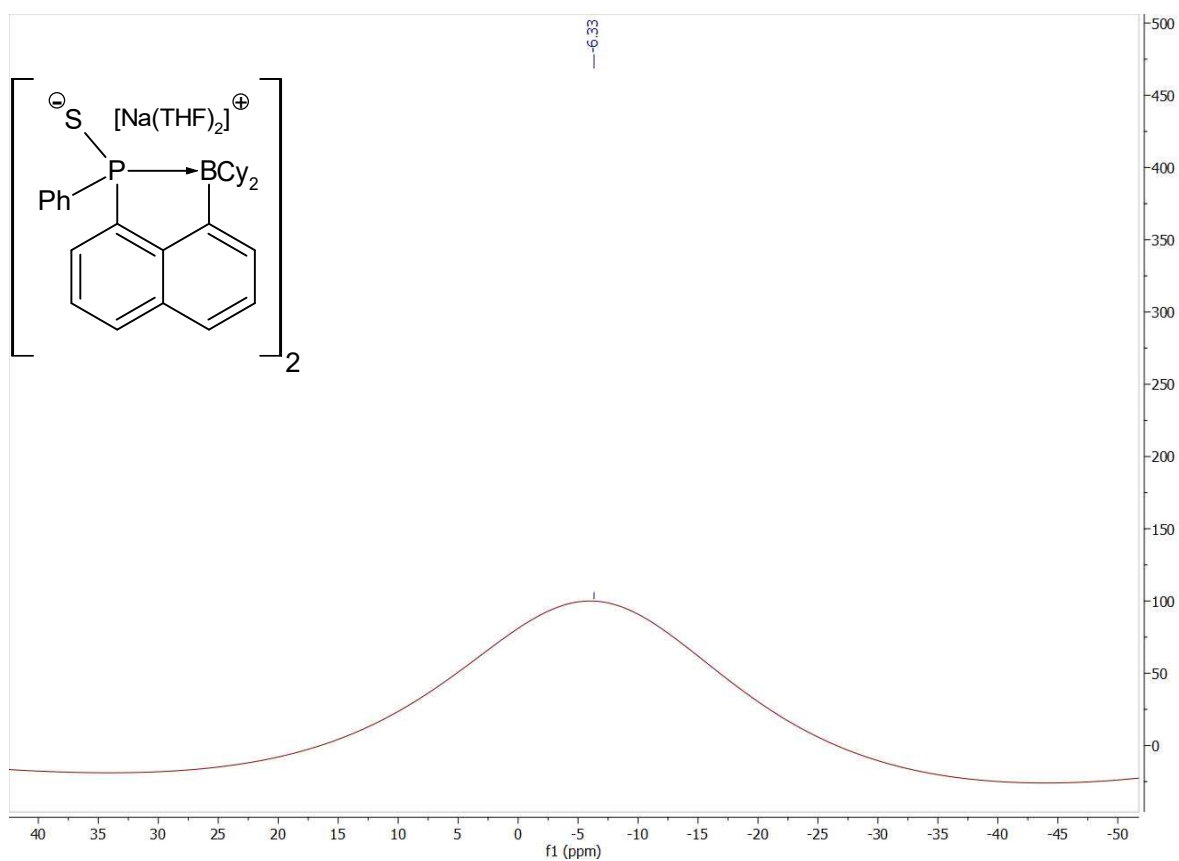

Figure S32.  $^{11}\text{B}\{^1\text{H}\}$  NMR ( $\text{C}_6\text{D}_6$ , 160.57 MHz) of  $\{[\text{Na}(\text{THF})_2]^+ [1\text{-BCy}_2\text{-8-P(S)Ph-C}_{10}\text{H}_6]^- \}_2$  (**8**)

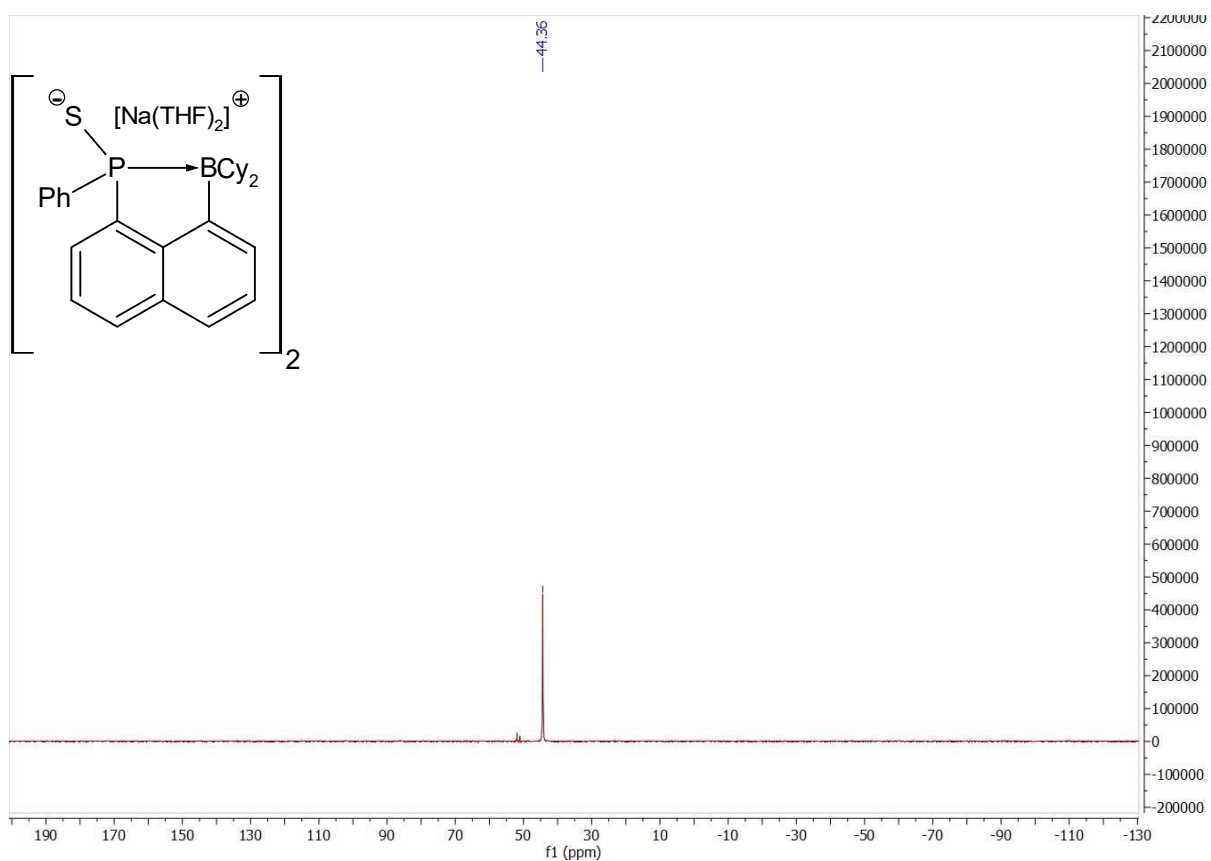

Figure S33.  $^{31}\text{P}\{^1\text{H}\}$  NMR ( $\text{C}_6\text{D}_6$ , 202.49 MHz) of  $\{[\text{Na}(\text{THF})_2]^+ [1\text{-BCy}_2\text{-8-P(S)Ph-C}_{10}\text{H}_6]^- \}_2$  (**8**)

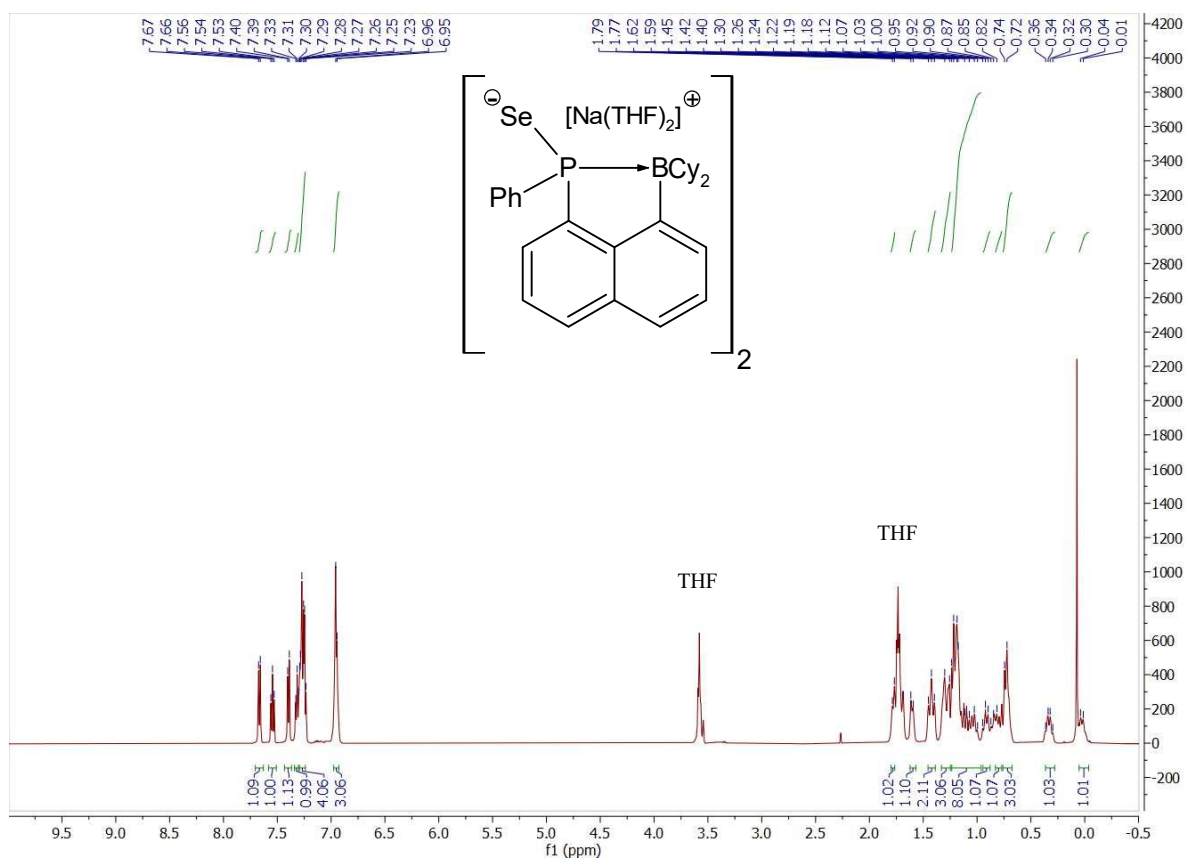

Figure S34.  $^1\text{H}$  NMR ( $\text{THF-d}_8$ , 500.13 MHz) of  $\{[\text{Na}(\text{THF})_2]^+ [1\text{-BCy}_2\text{-8-P}(\text{Se})\text{Ph-C}_{10}\text{H}_6]\}_2$  (**9**)

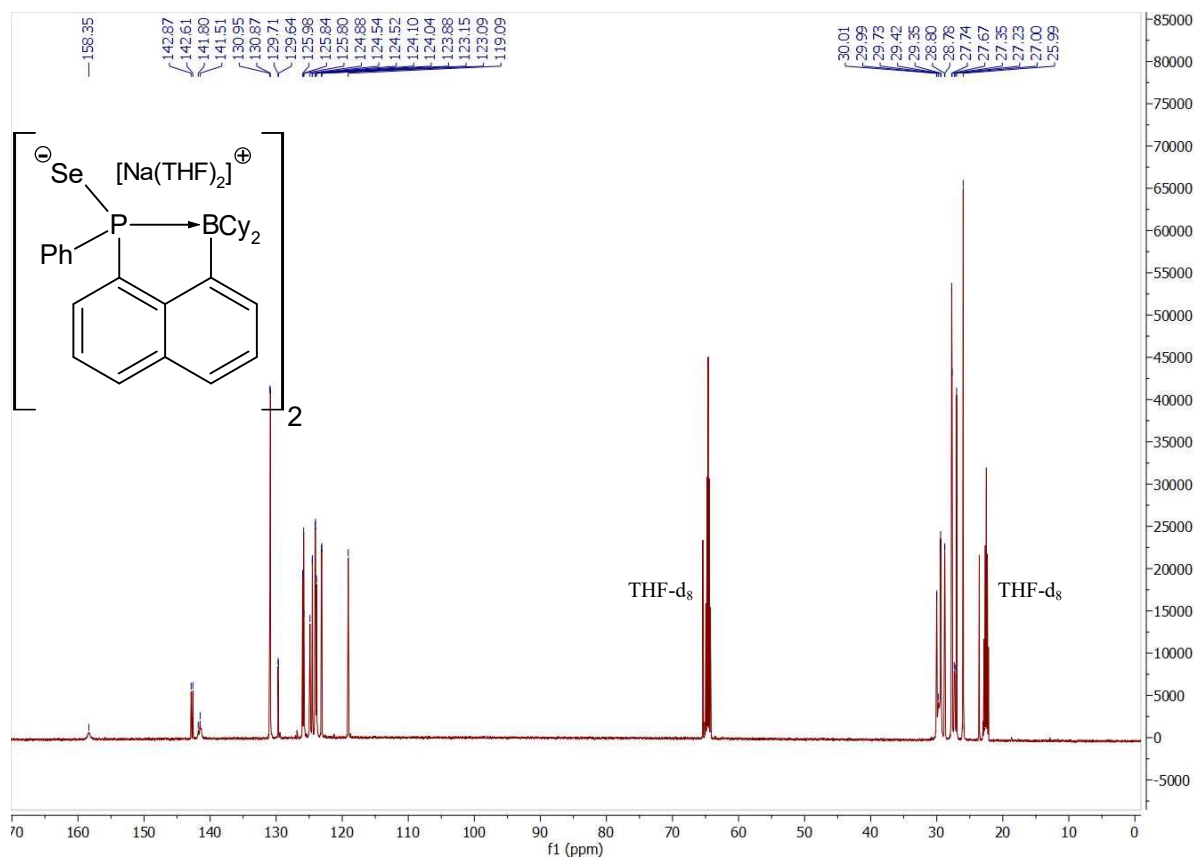

Figure S35.  $^{13}\text{C}\{^1\text{H}\}$  NMR ( $\text{THF-d}_8$ , 125.77 MHz) of  $\{[\text{Na}(\text{THF})_2]^+ [1\text{-BCy}_2\text{-8-P(Se)Ph-C}_{10}\text{H}_6]_2^-\}_2$  (9)

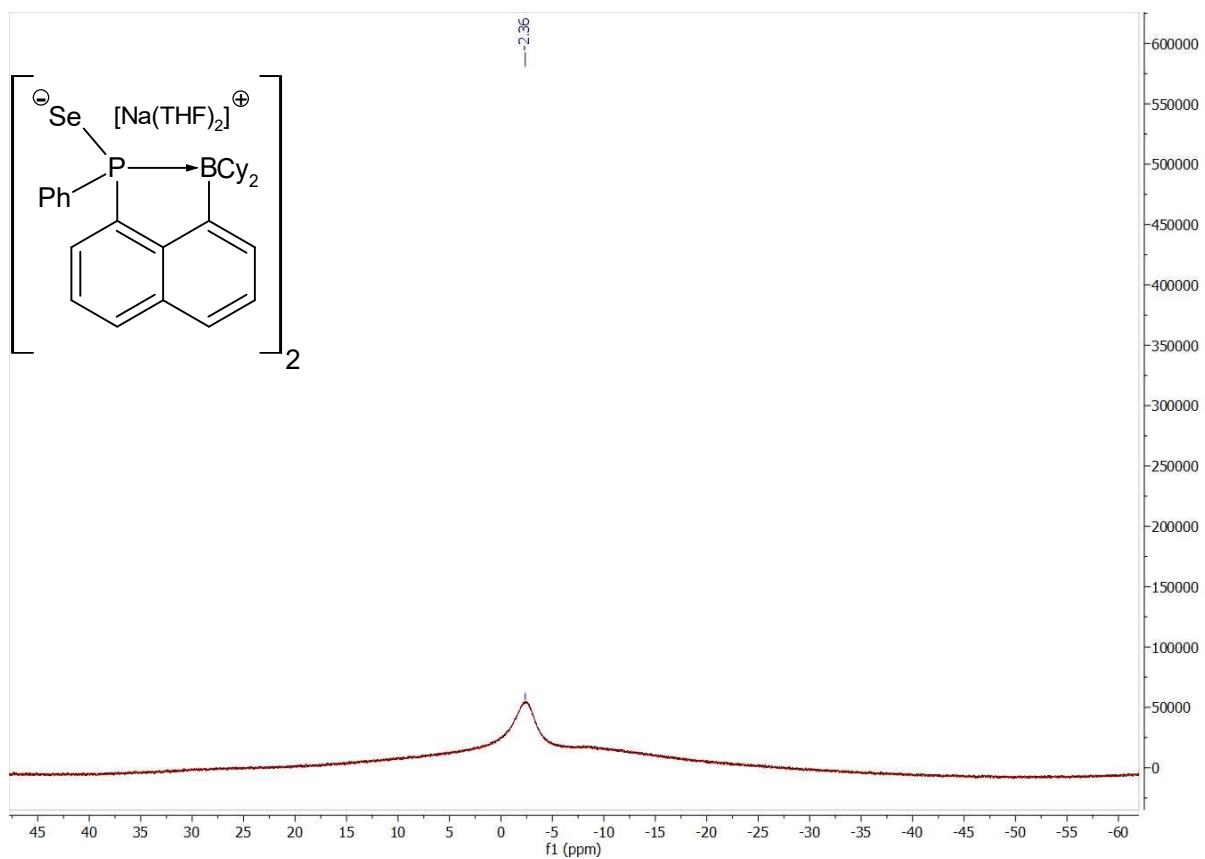

Figure S36.  $^{11}\text{B}\{^1\text{H}\}$  NMR ( $\text{THF-}d_8$ , 160.57 MHz) of  $\{[\text{Na}(\text{THF})_2]^+ [1\text{-BCy}_2\text{-}8\text{-P}(\text{Se})\text{Ph-C}_{10}\text{H}_6]^- \}_2$  (**9**)

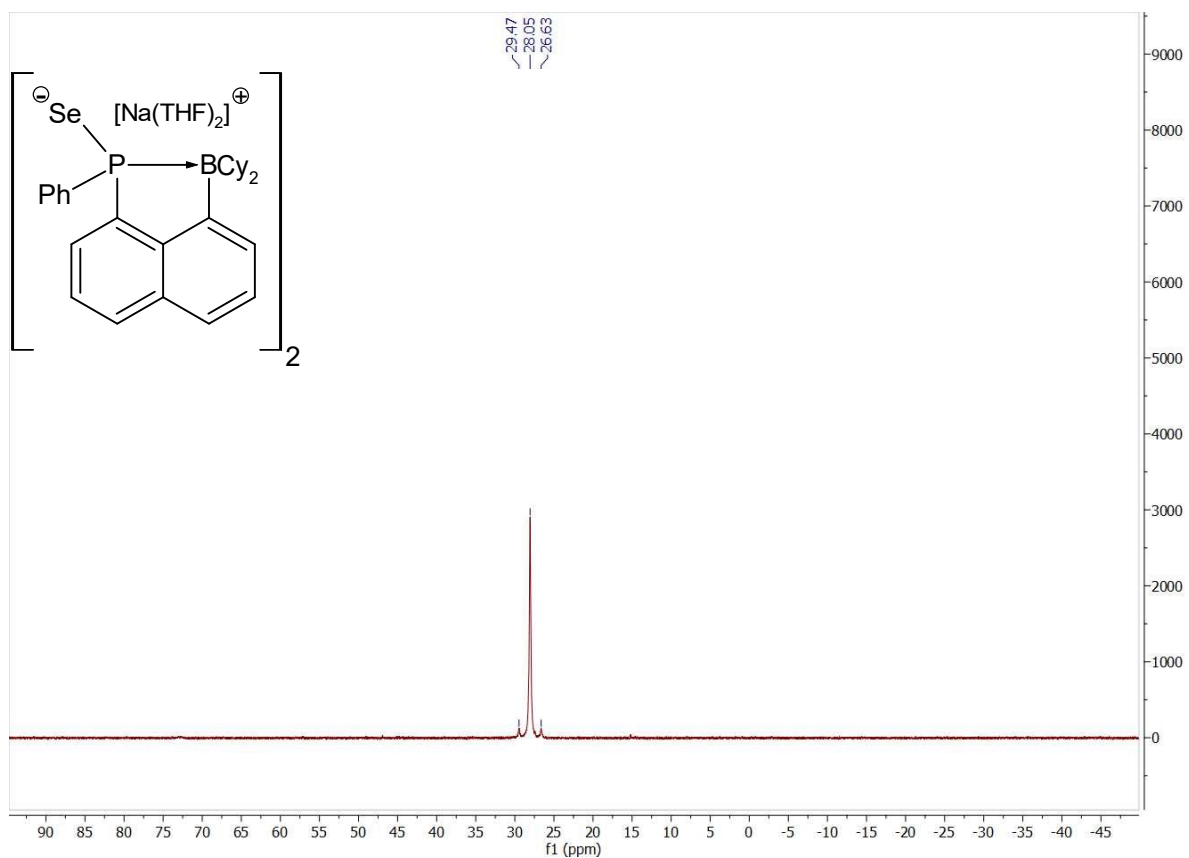

Figure S37.  $^{31}\text{P}\{^1\text{H}\}$  NMR ( $\text{THF}-d_8$ , 202.49 MHz) of  $\{[\text{Na}(\text{THF})_2]^+ [1\text{-BCy}_2\text{-8-P}(\text{Se})\text{Ph-C}_{10}\text{H}_6]^- \}_2$  (**9**)



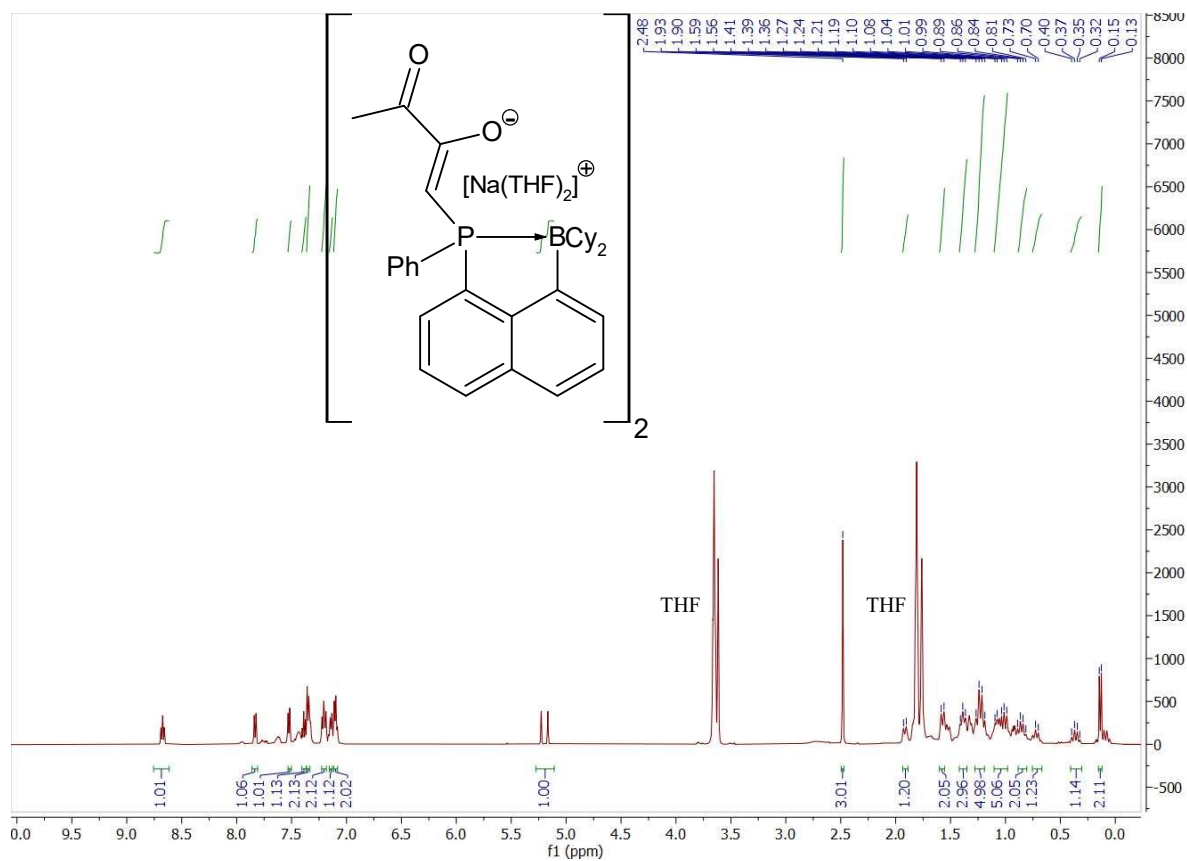

Figure S38.  $^1\text{H}$  NMR ( $\text{THF-}d_8$ , 500.13 MHz) of  $\{[\text{Na}(\text{THF})_2]^+ [1\text{-BCy}_2\text{-8-P}\{\text{CH}=\text{C}(\text{O})\text{C}(\text{Me})\text{O}\}\text{Ph-C}_{10}\text{H}_6]\}_2$  (**10**)

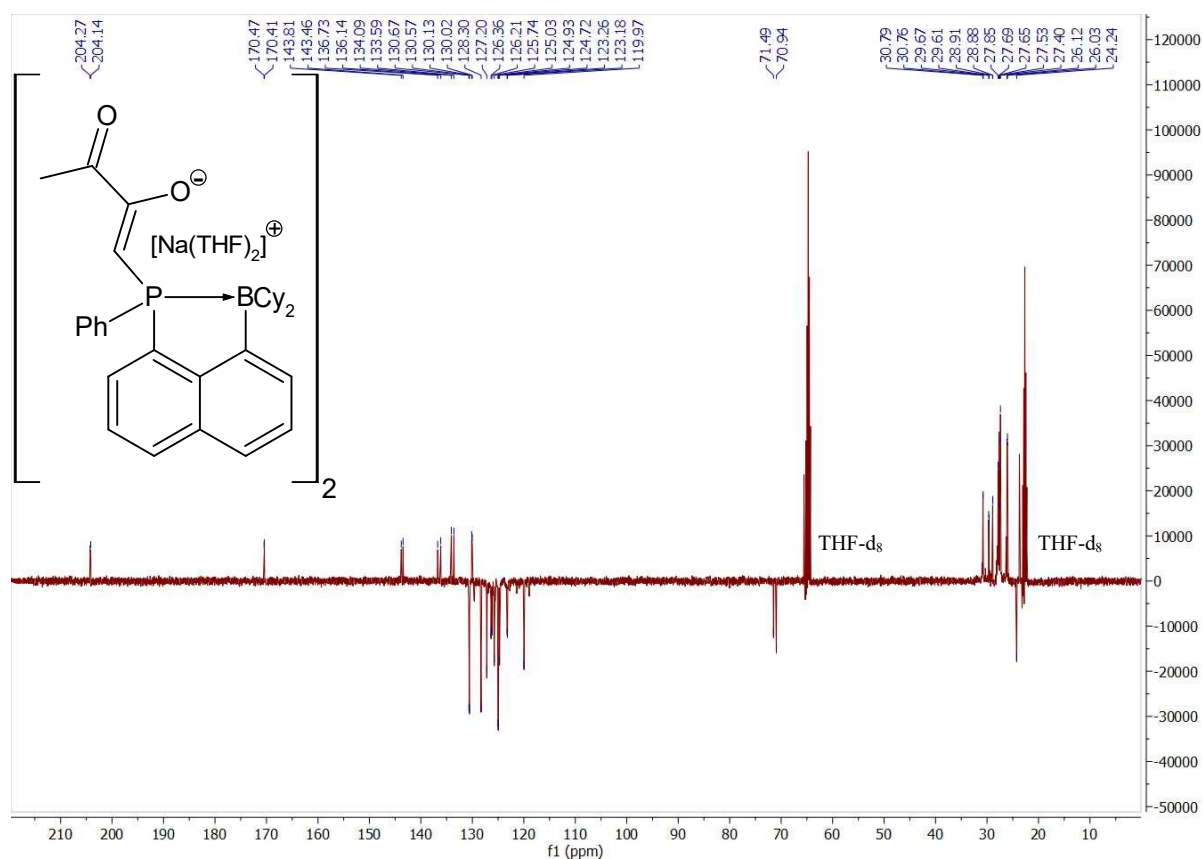

Figure S39.  $^{13}\text{C}\{^1\text{H}\}$  NMR (THF-d<sub>8</sub>, 125.77 MHz) of  $\{[\text{Na}(\text{THF})_2]^+ [1\text{-BCy}_2\text{-8-P}\{\text{CH}=\text{C}(\text{O})\text{C}(\text{Me})\text{O}\}\text{Ph-C}_{10}\text{H}_6]^- \}_2$  (**10**)

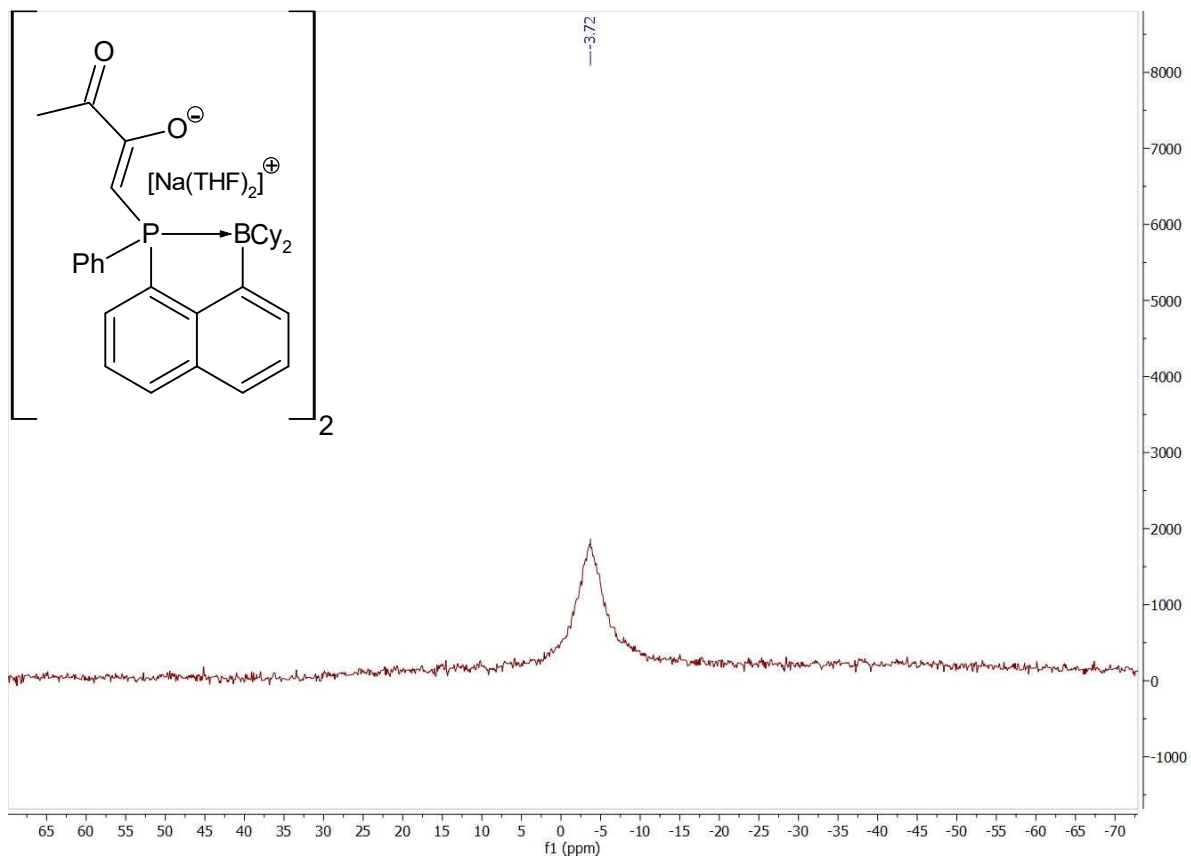

Figure S40.  $^{11}\text{B}\{^1\text{H}\}$  NMR (THF- $d_8$ , 160.57 MHz) of  $\{[\text{Na}(\text{THF})_2]^+ [1\text{-BCy}_2\text{-8-P}\{\text{CH}=\text{C}(\text{O})\text{C}(\text{Me})\text{O}\}\text{Ph-C}_{10}\text{H}_6]^- \}_2$  (**10**)

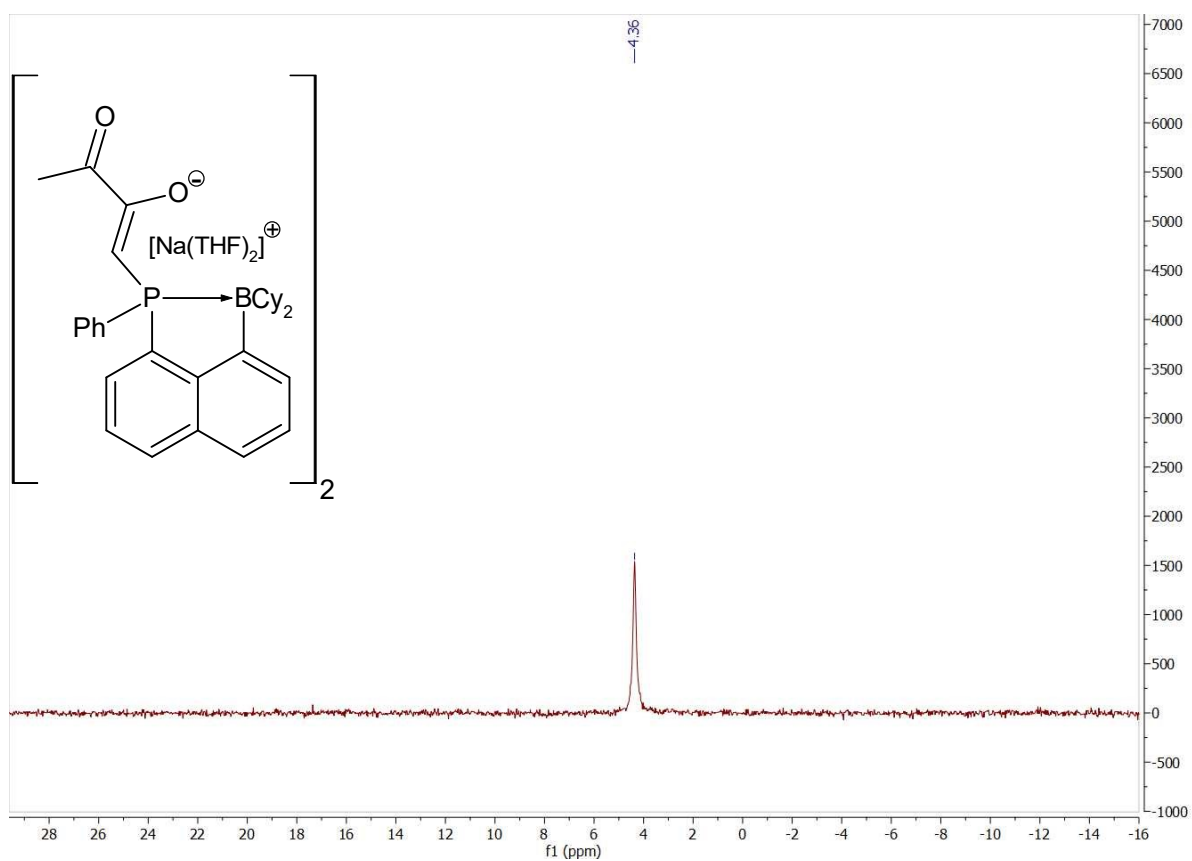

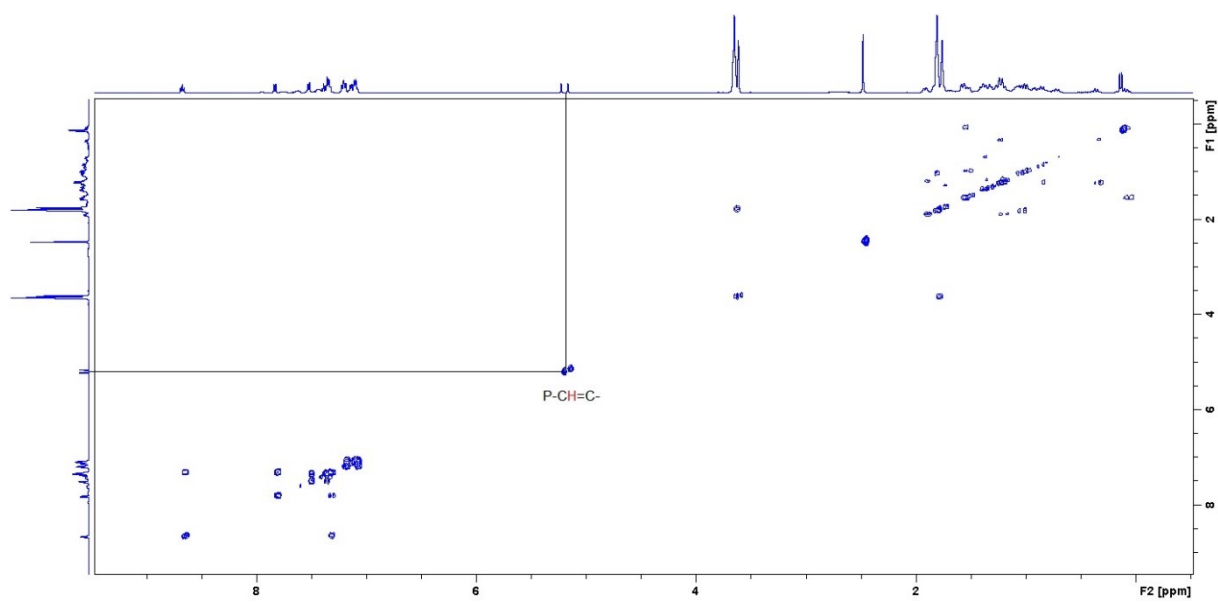

Figure S42.  $^1\text{H}$ - $^1\text{H}$  COSY NMR of  $\{[\text{Na}(\text{THF})_2]^+ [1\text{-BCy}_2\text{-8-P}\{\text{CH}=\text{C}(\text{O})\text{C}(\text{Me})\text{O}\}\text{Ph-C}_{10}\text{H}_6]\}_2$  (**10**)

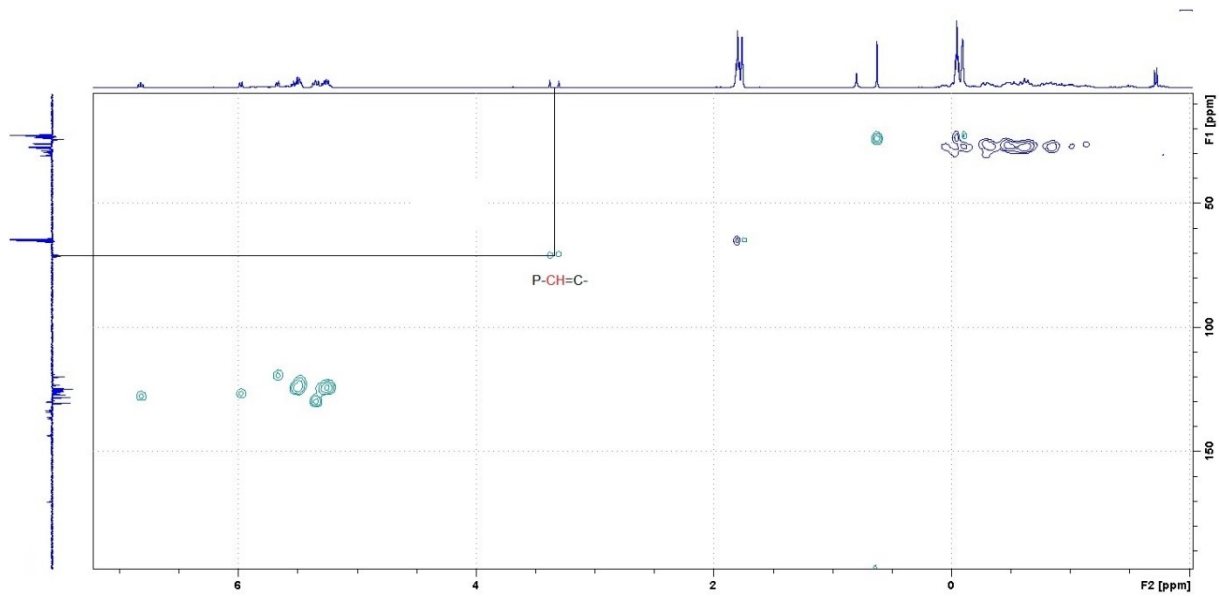

Figure S43.  $^1\text{H}$ - $^{13}\text{C}$  HSQC NMR of  $\{[\text{Na}(\text{THF})_2]^+ [1\text{-BCy}_2\text{-8-P}\{\text{CH}=\text{C}(\text{O})\text{C}(\text{Me})\text{O}\}\text{Ph-C}_{10}\text{H}_6]^- \}_2$  (**10**)

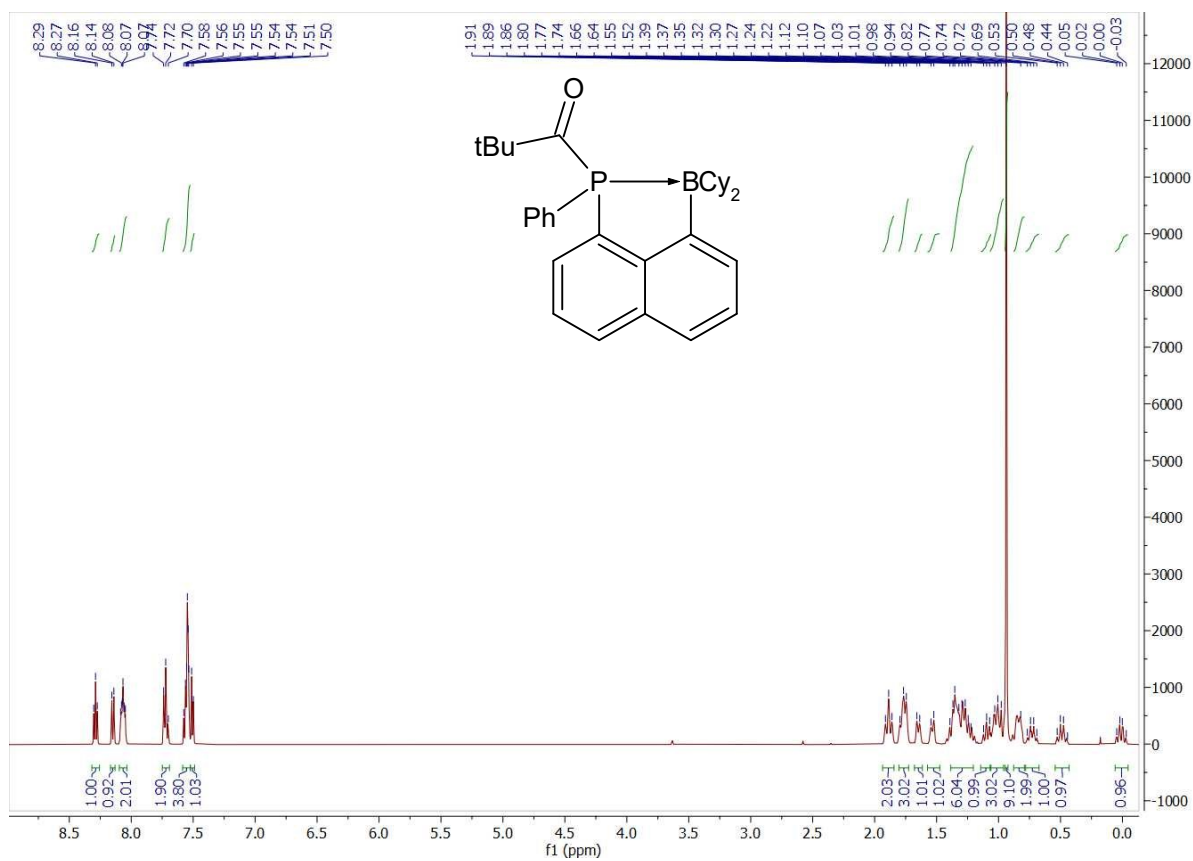

Figure S44.  $^1\text{H}$  NMR (THF- $d_8$ , 500.13 MHz) of [1-BCy<sub>2</sub>-8-P{C(O)tBu}Ph-C<sub>10</sub>H<sub>6</sub>] (**11**)

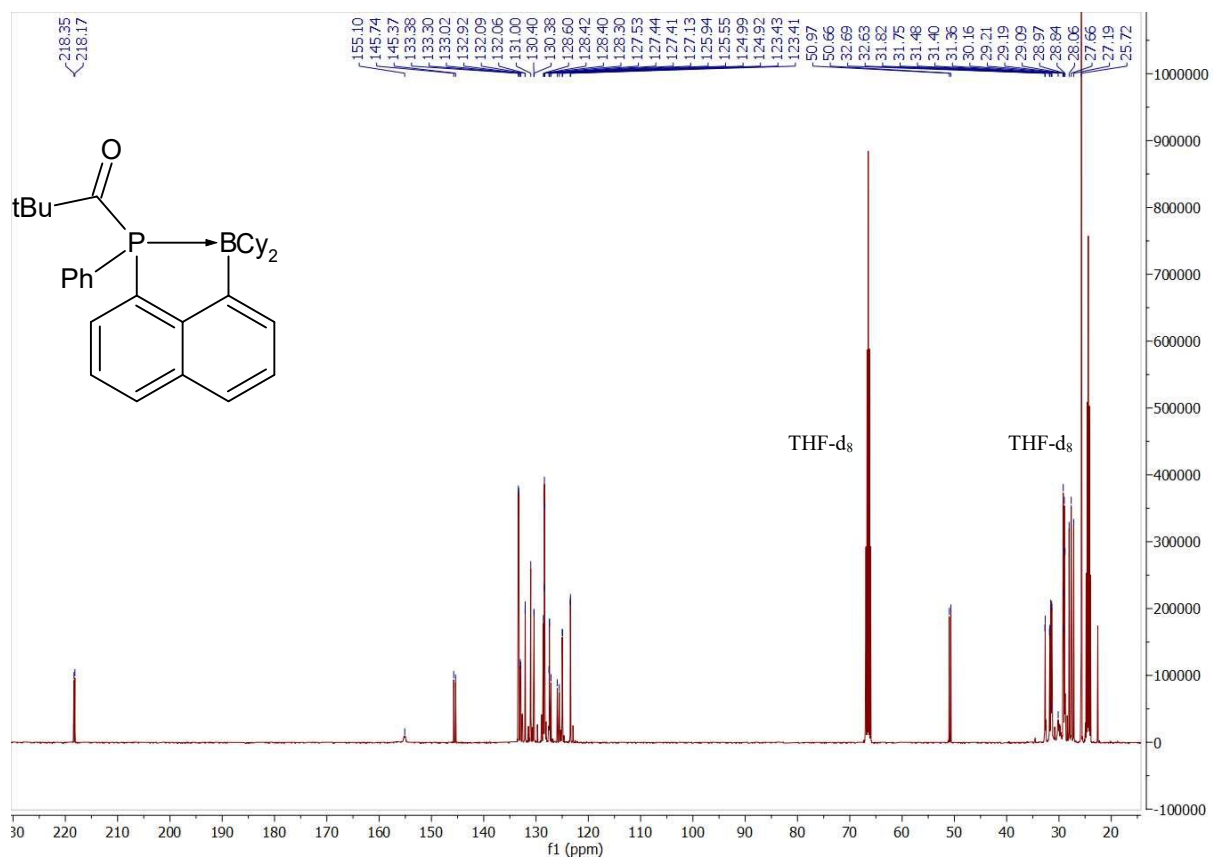



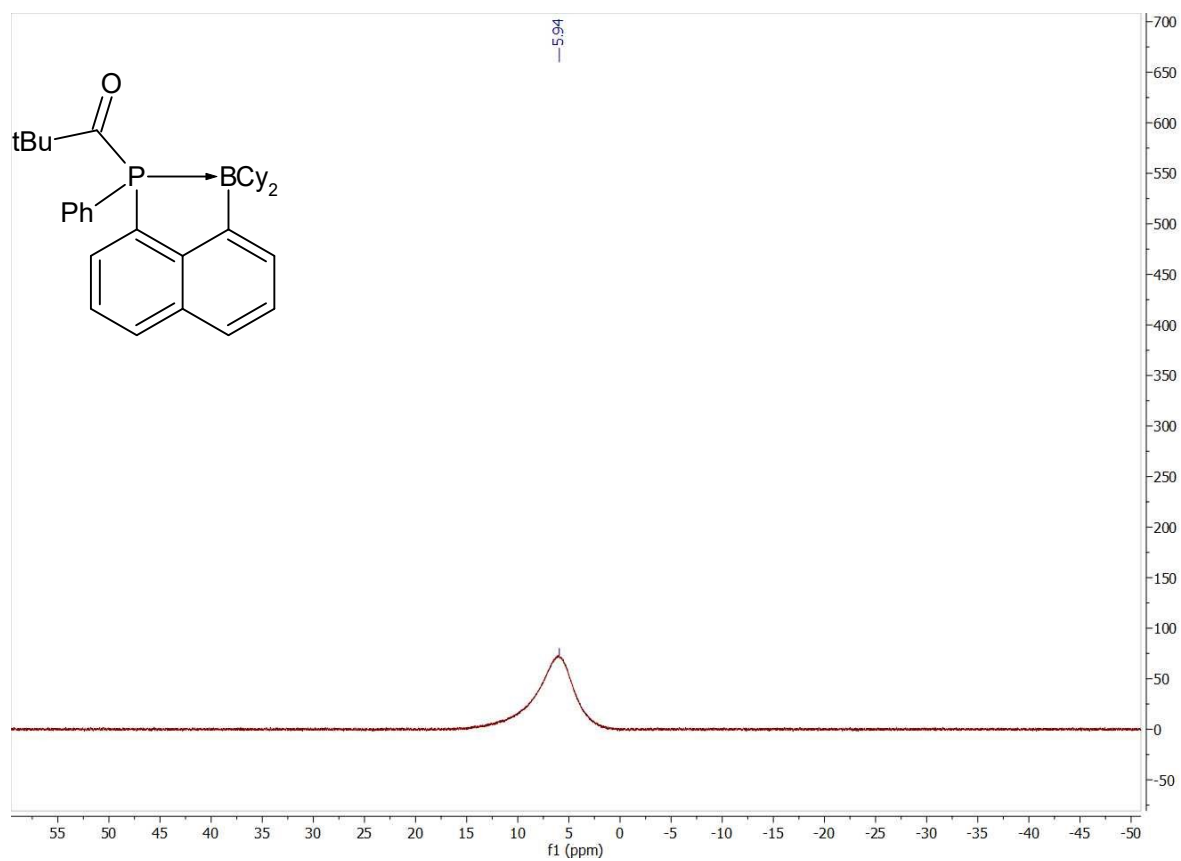

Figure S46.  $^{11}\text{B}\{^1\text{H}\}$  NMR ( $\text{THF-d}_8$ , 160.57 MHz) of [1- $\text{BCy}_2$ -8- $\text{P}\{\text{C}(\text{O})\text{tBu}\}\text{Ph-C}_{10}\text{H}_6$ ] (**11**)

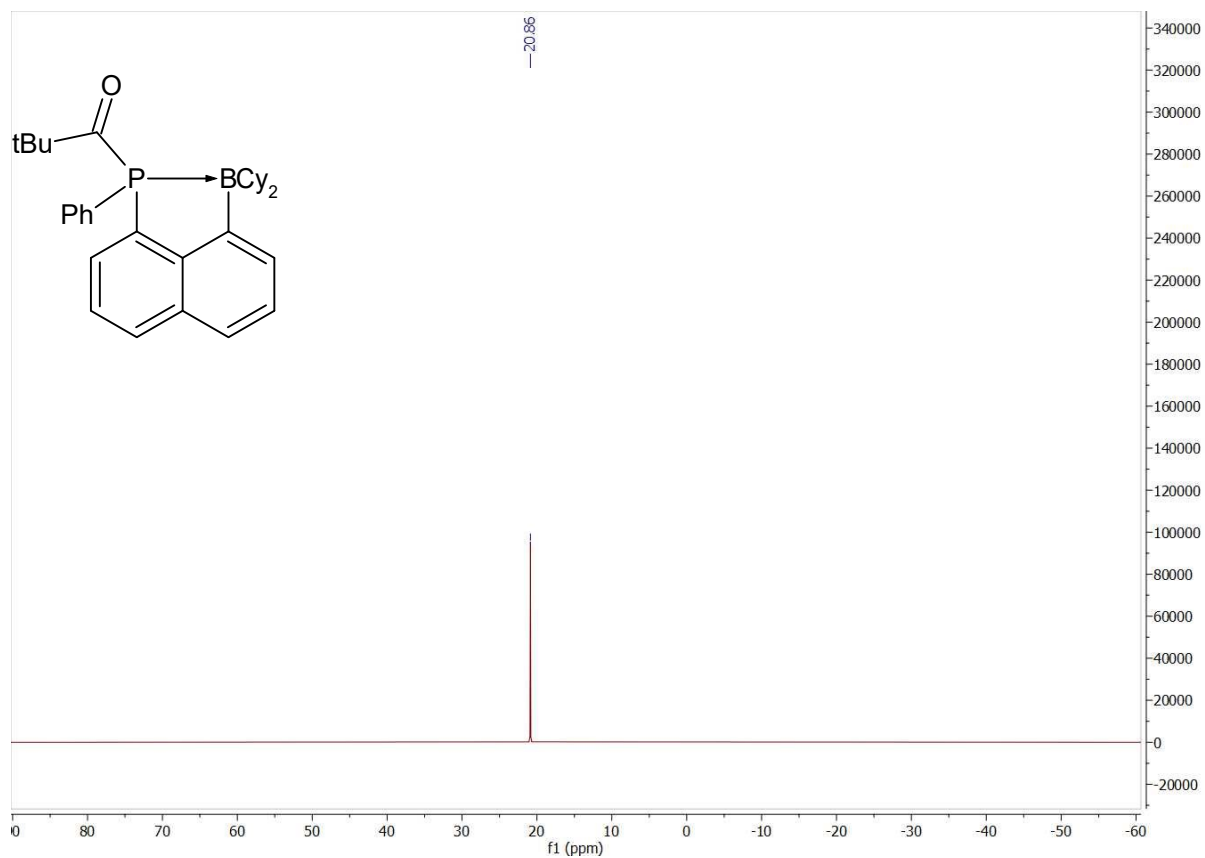

Figure S47.  $^{31}\text{P}\{^1\text{H}\}$  NMR (THF- $d_8$ , 202.49 MHz) of [1- $\text{BCy}_2$ -8- $\text{P}\{\text{C}(\text{O})\text{tBu}\}\text{Ph}-\text{C}_{10}\text{H}_6$ ] (**11**)

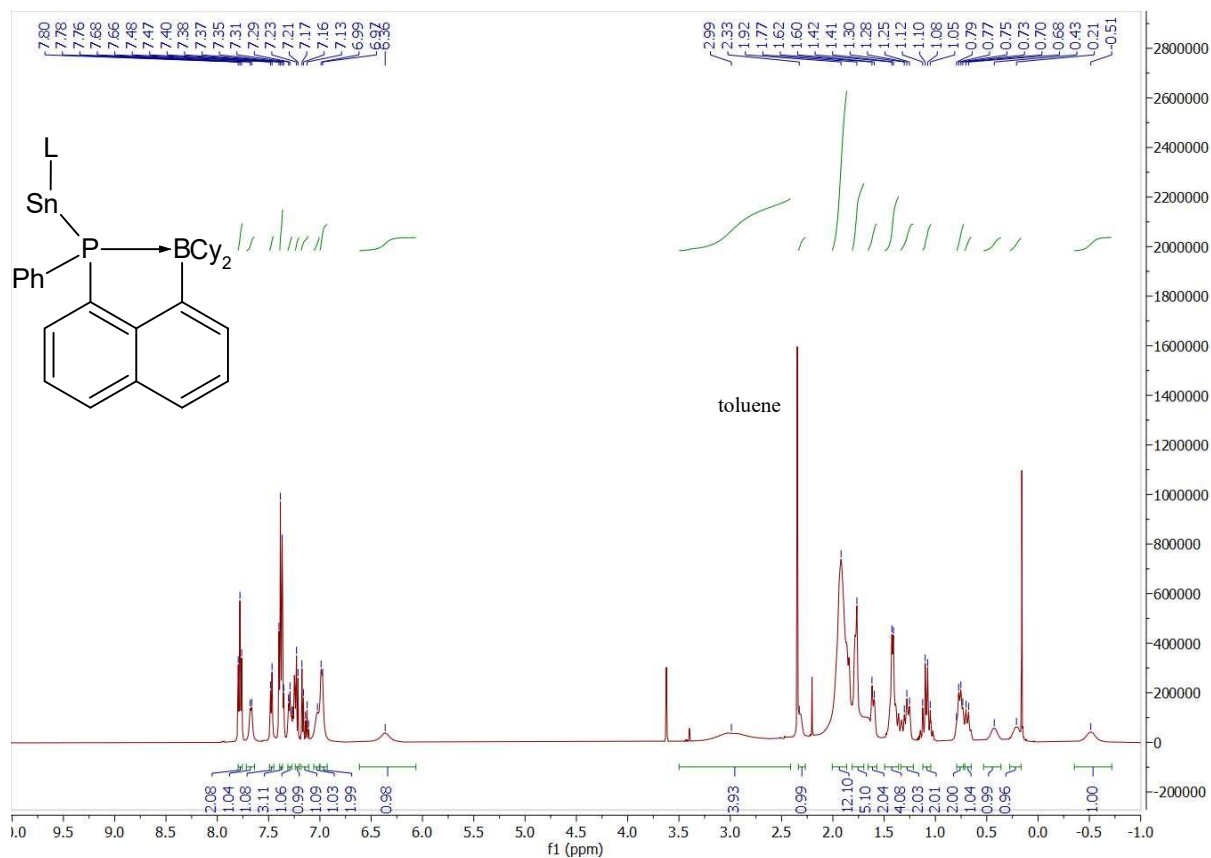

Figure S48. <sup>1</sup>H NMR (THF-d<sub>8</sub>, 500.13 MHz) of [1-BCy<sub>2</sub>-8-P(SnL)Ph-C<sub>10</sub>H<sub>6</sub>] (**12**)

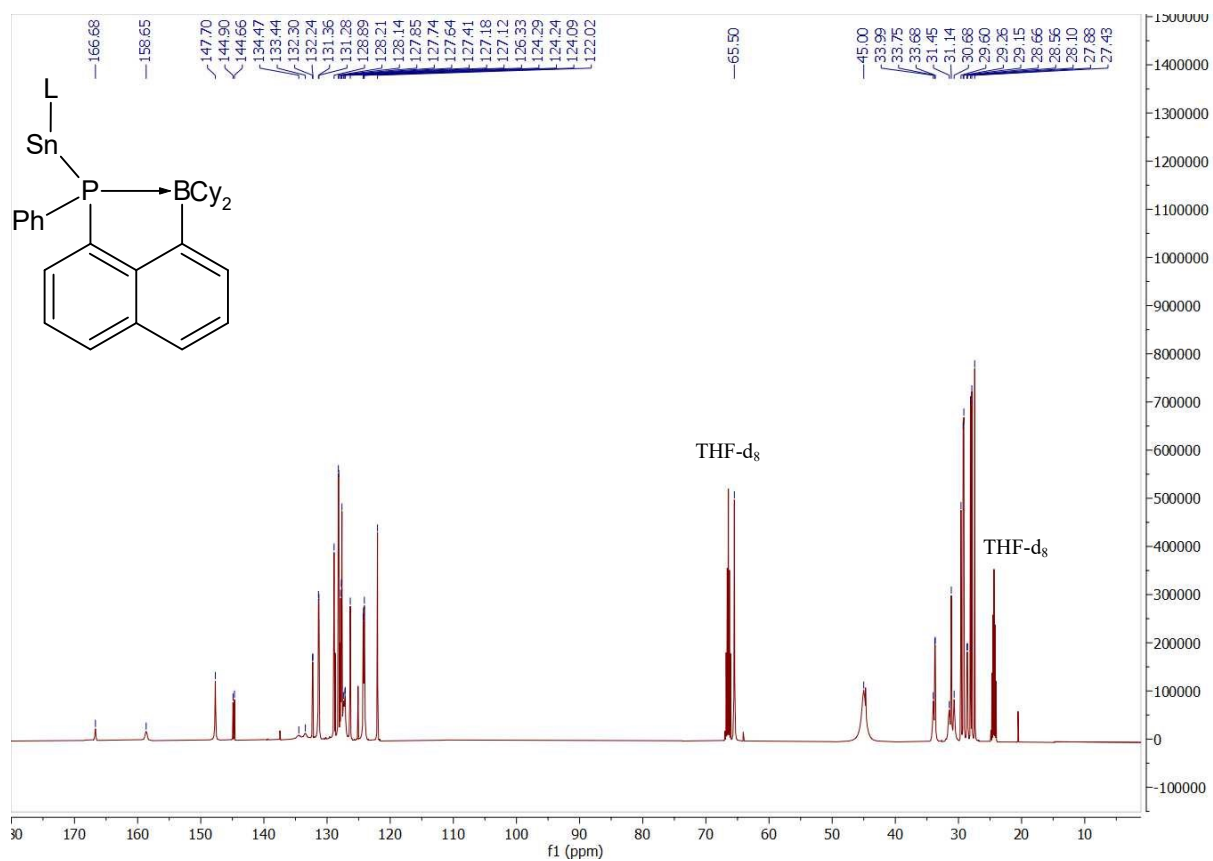

Figure S49.  $^{13}\text{C}\{^1\text{H}\}$  NMR (THF- $d_8$ , 125.77 MHz) of  $[1\text{-BCy}_2\text{-}8\text{-P(SnL)Ph-C}_{10}\text{H}_6]$  (**12**)

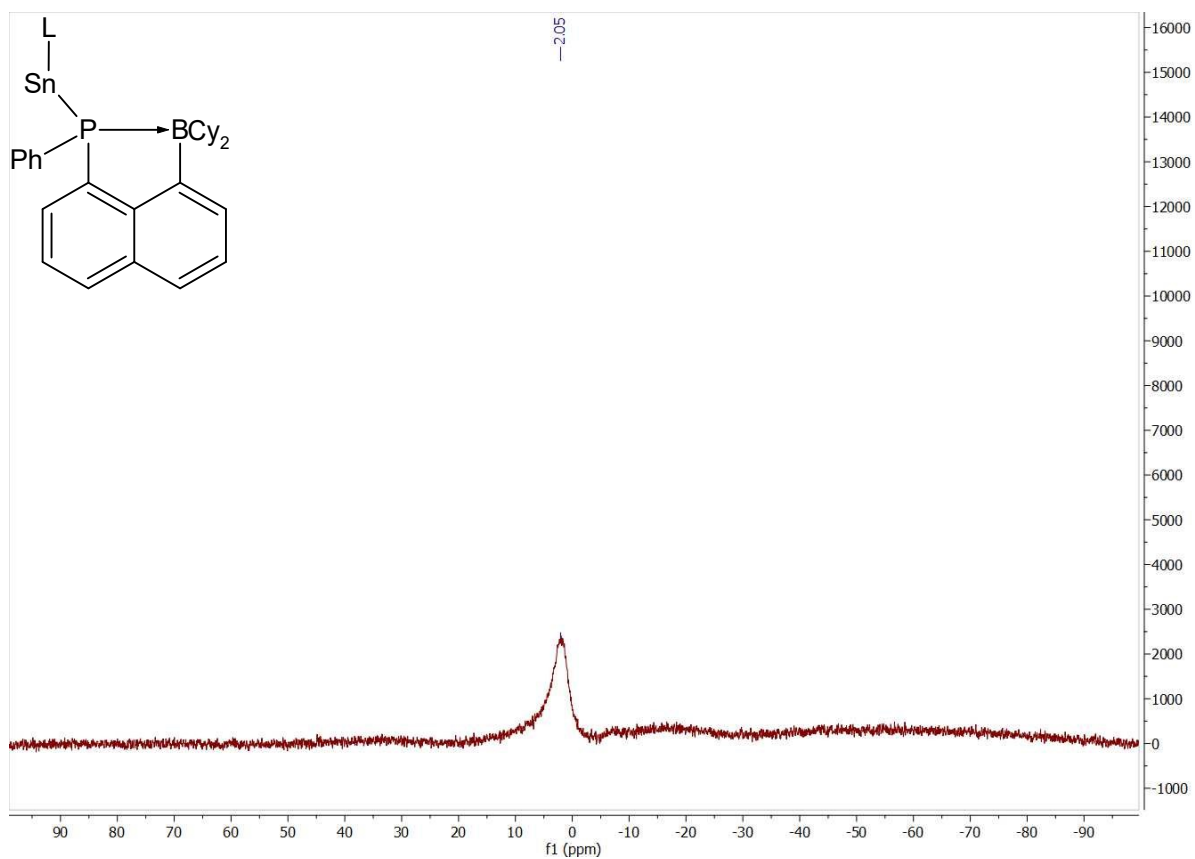

Figure S50.  $^{11}\text{B}\{^1\text{H}\}$  NMR ( $\text{THF-d}_8$ , 160.57 MHz) of  $[1\text{-BCy}_2\text{-}8\text{-P}(\text{SnL})\text{Ph-C}_{10}\text{H}_6]$  (**12**)

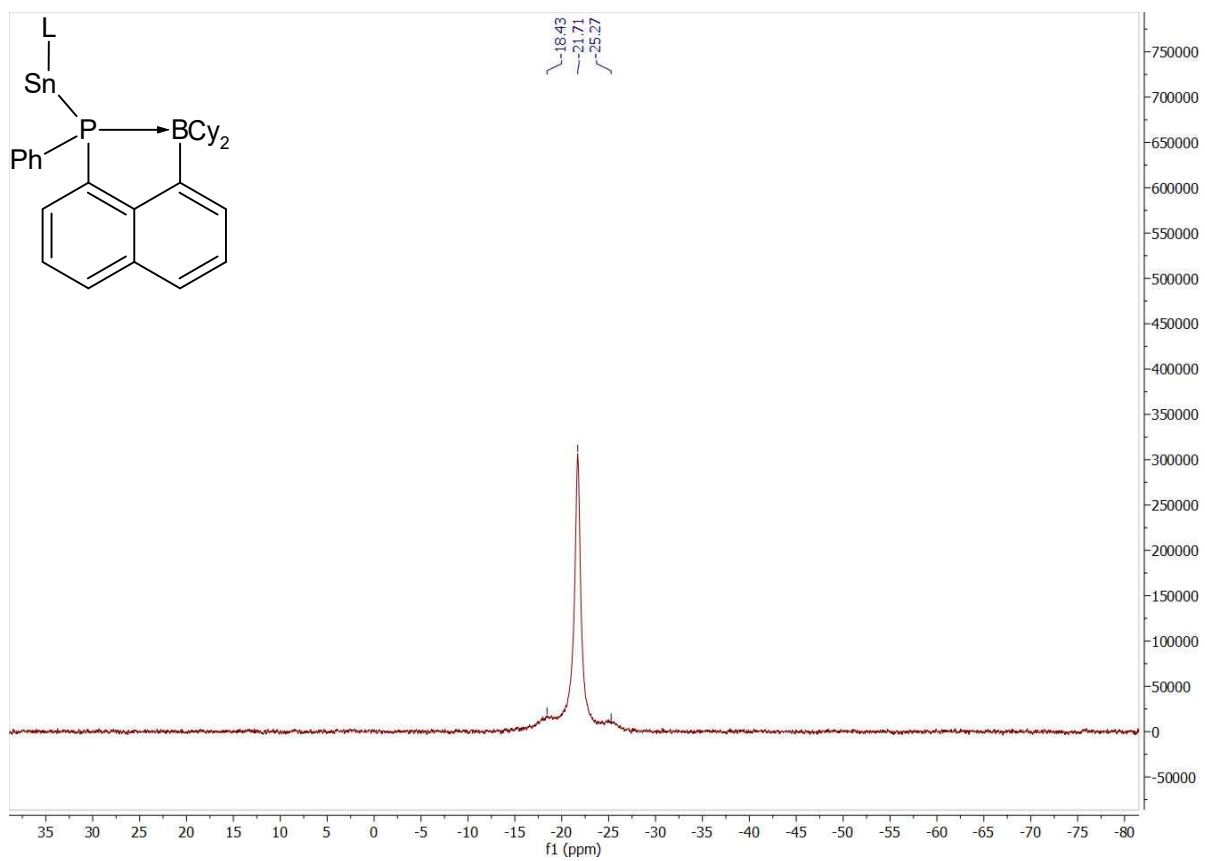

Figure S51.  $^{31}\text{P}\{^1\text{H}\}$  NMR ( $\text{THF-d}_8$ , 202.49 MHz) of  $[1\text{-BCy}_2\text{-}8\text{-P(SnL)Ph-C}_{10}\text{H}_6]$  (**12**)

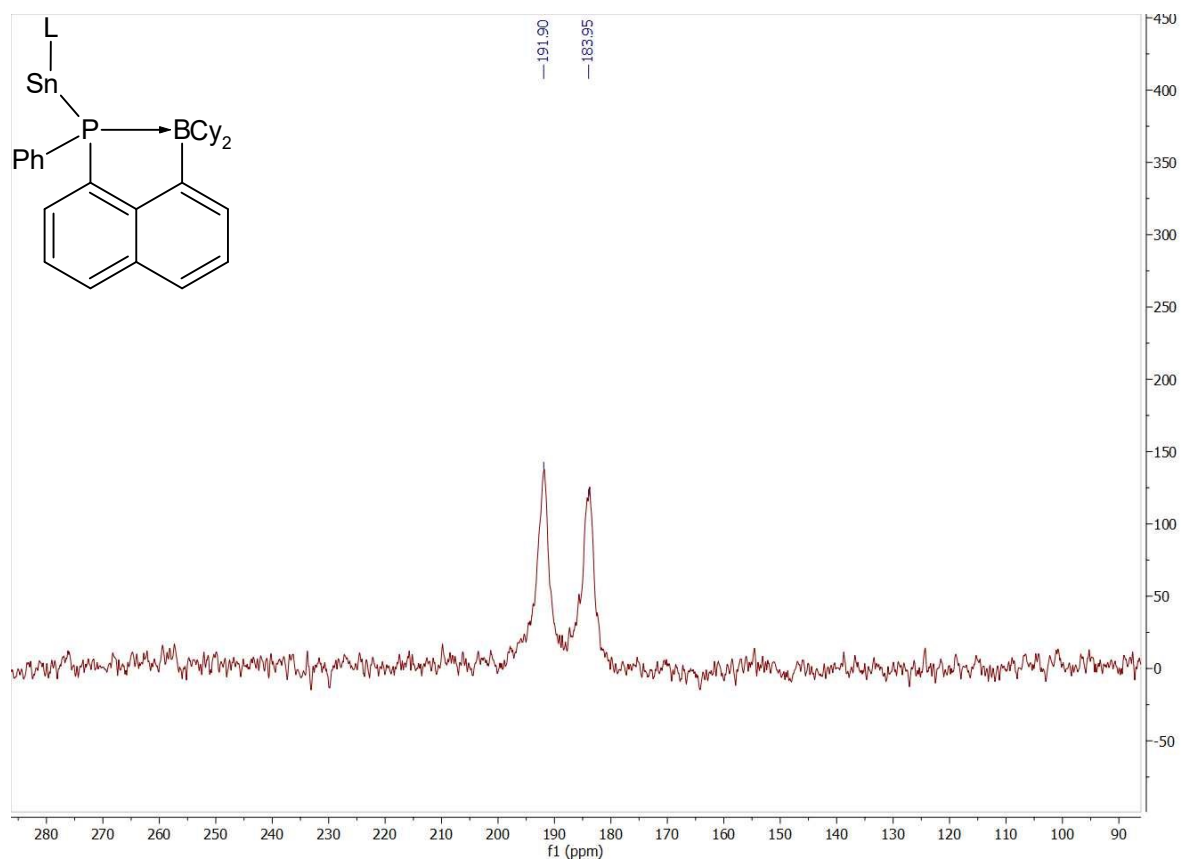

Figure S52.  $^{119}\text{Sn}\{^1\text{H}\}$  NMR ( $\text{THF-d}_8$ , 186.52 MHz) of  $[1\text{-BCy}_2\text{-8-P(SnL)Ph-C}_{10}\text{H}_6]$  (**12**)

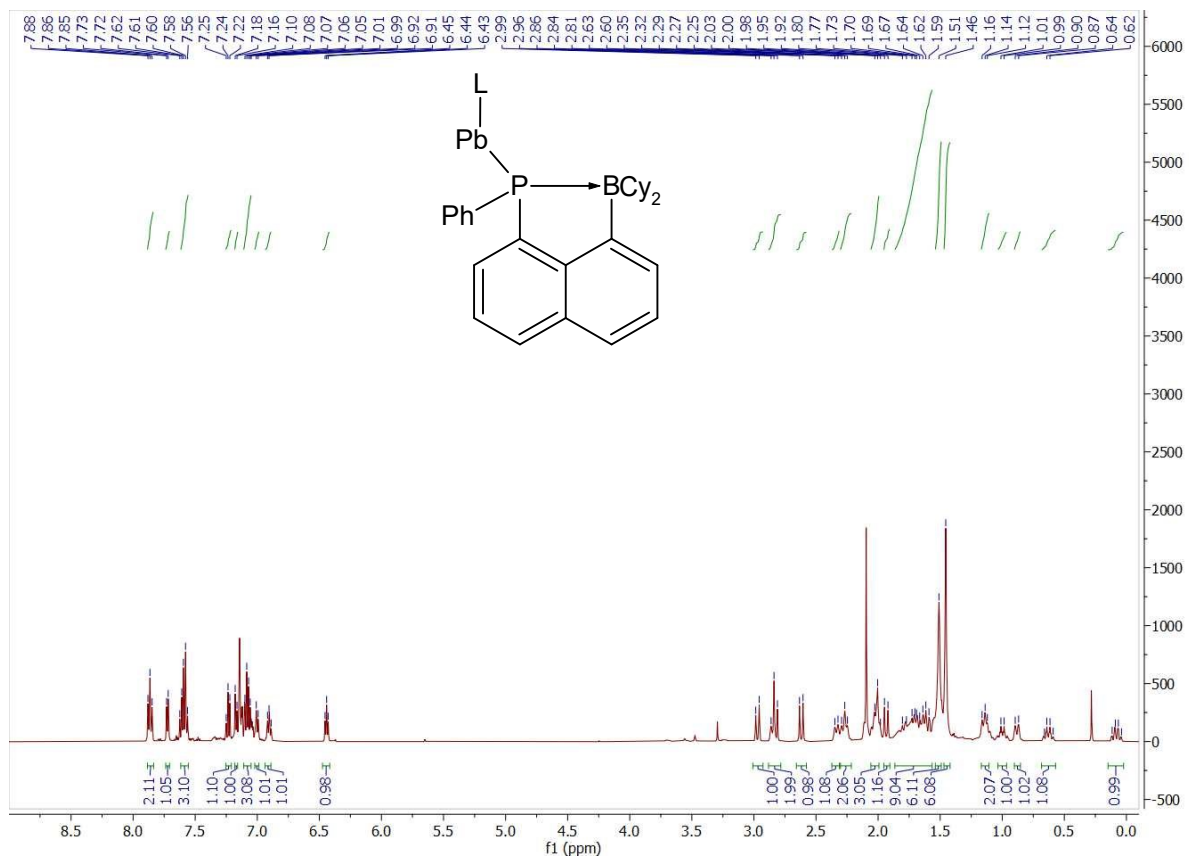

Figure S53.  $^1\text{H NMR}$  ( $\text{C}_6\text{D}_6$ , 500.13 MHz) of  $[1\text{-BCy}_2\text{-8-P(PbL)Ph-C}_{10}\text{H}_6]$  (**13**)



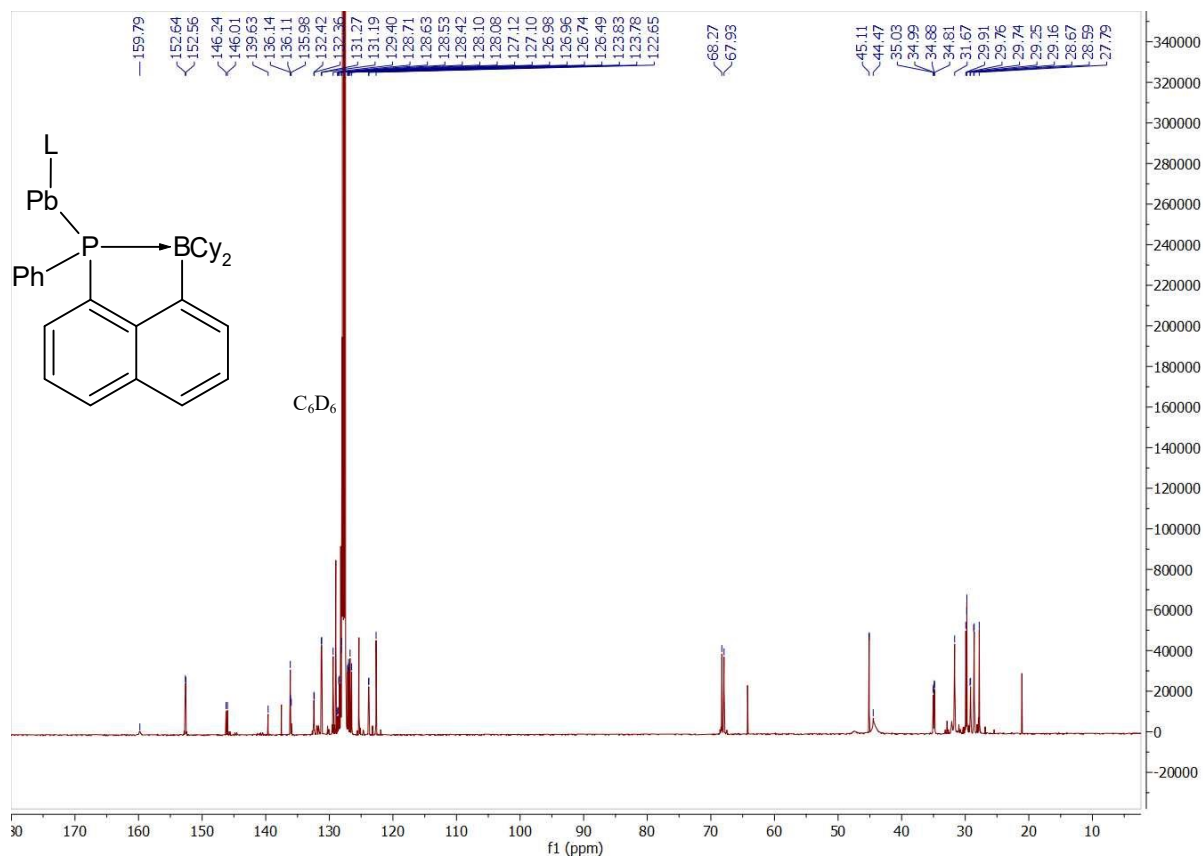

Figure S54.  $^{13}\text{C}\{^1\text{H}\}$  NMR ( $\text{C}_6\text{D}_6$ , 125.77 MHz) of [1-BCy<sub>2</sub>-8-P(PbL)Ph-C<sub>10</sub>H<sub>6</sub>] (**13**)

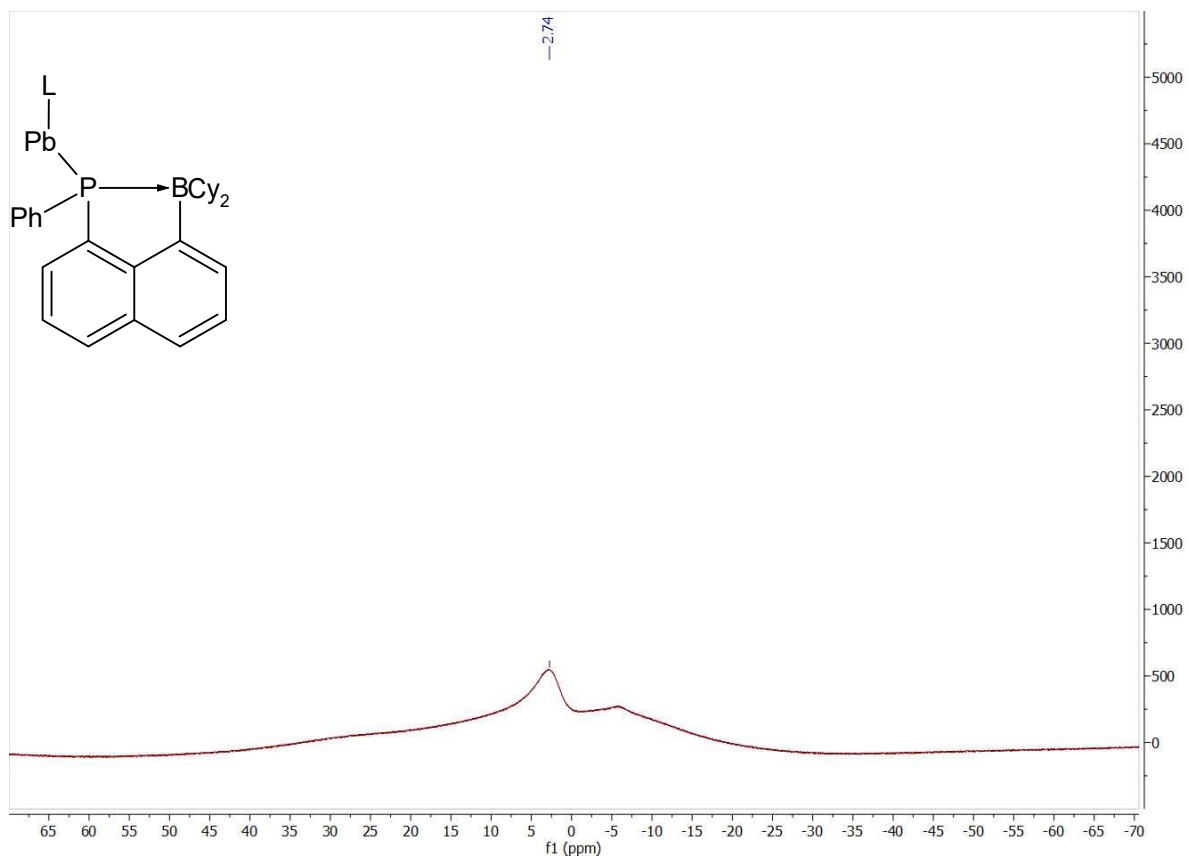

Figure S55.  $^{11}\text{B}\{^1\text{H}\}$  NMR ( $\text{C}_6\text{D}_6$ , 160.57 MHz) of  $[1\text{-BCy}_2\text{-}8\text{-P(PbL)Ph-C}_{10}\text{H}_6]$  (**13**)

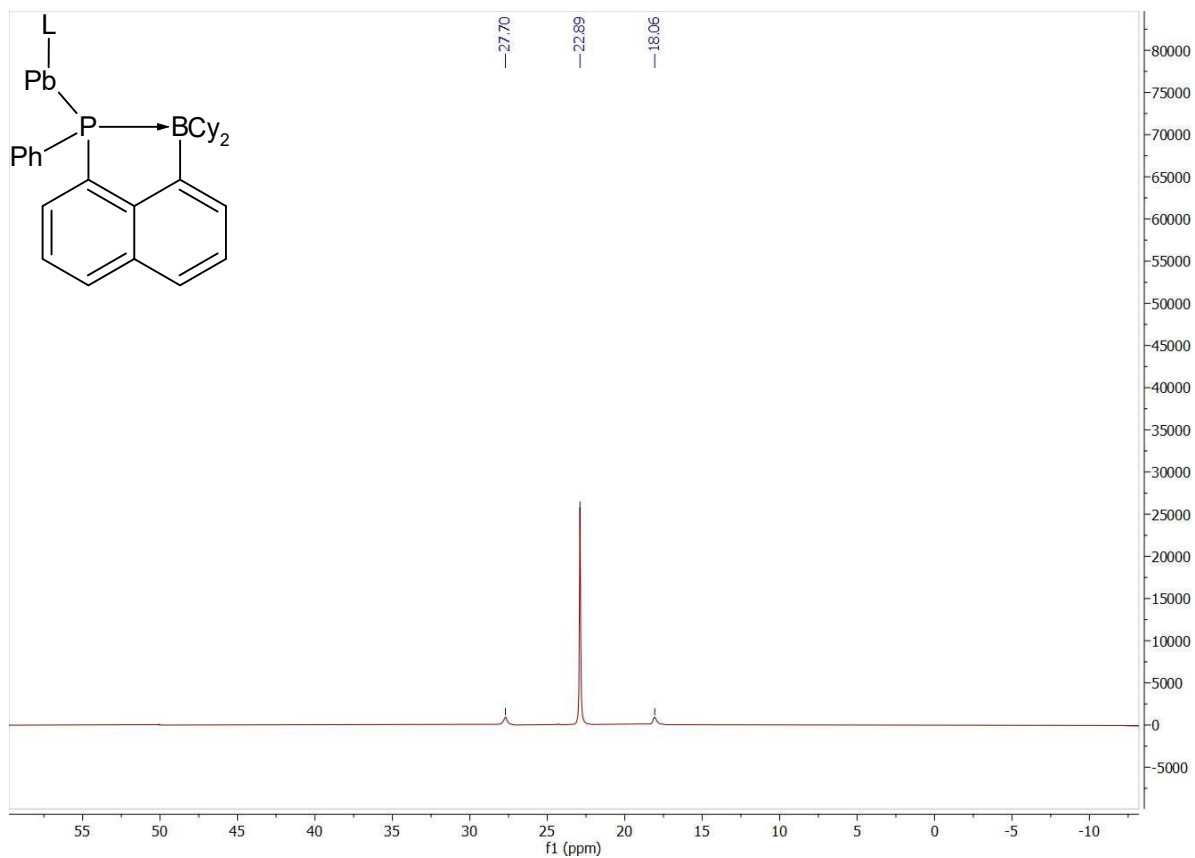

Figure S56. <sup>31</sup>P{<sup>1</sup>H} NMR (C<sub>6</sub>D<sub>6</sub>, 202.49 MHz) of [1-BCy<sub>2</sub>-8-P(PbL)Ph-C<sub>10</sub>H<sub>6</sub>] (**13**)

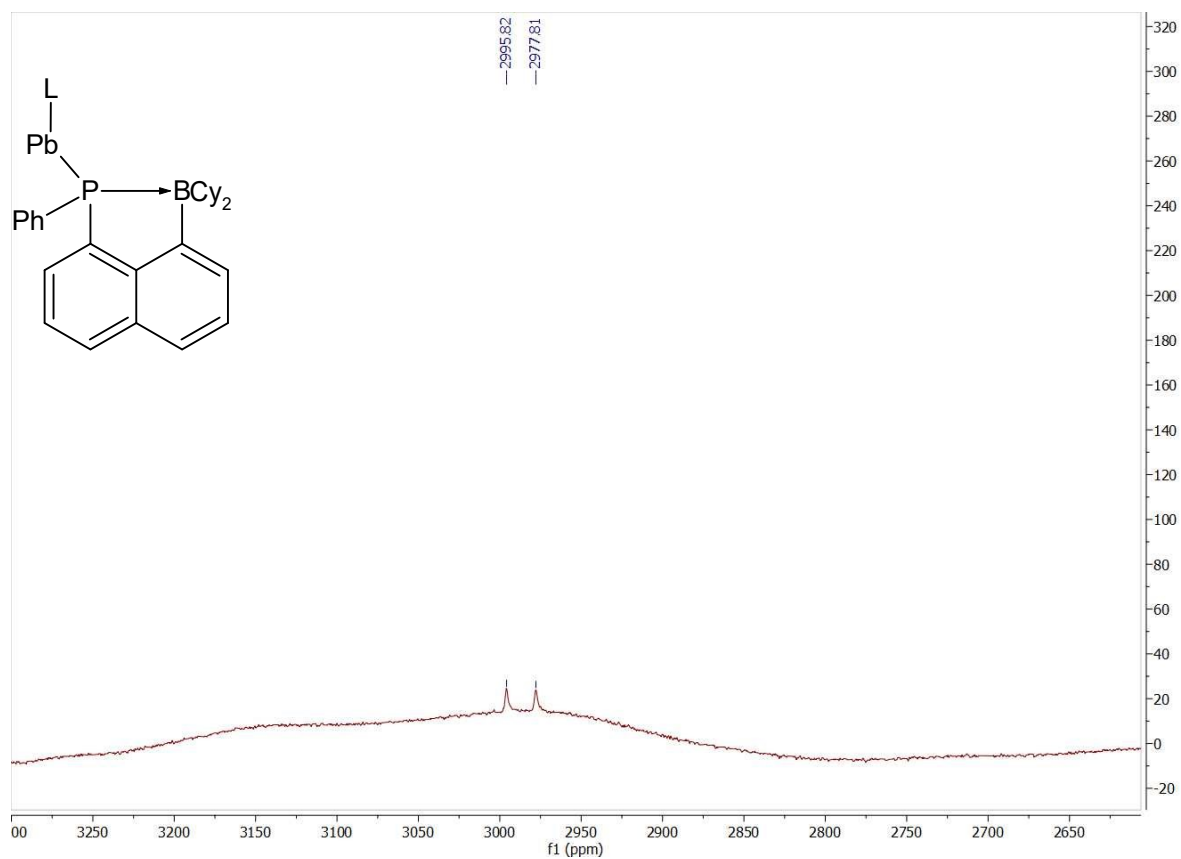

Figure S57.  $^{209}\text{Pb}\{^1\text{H}\}$  NMR ( $\text{C}_6\text{D}_6$ , 104.64 MHz) of [1-BCy<sub>2</sub>-8-P(PbL)Ph-C<sub>10</sub>H<sub>6</sub>] (**13**)

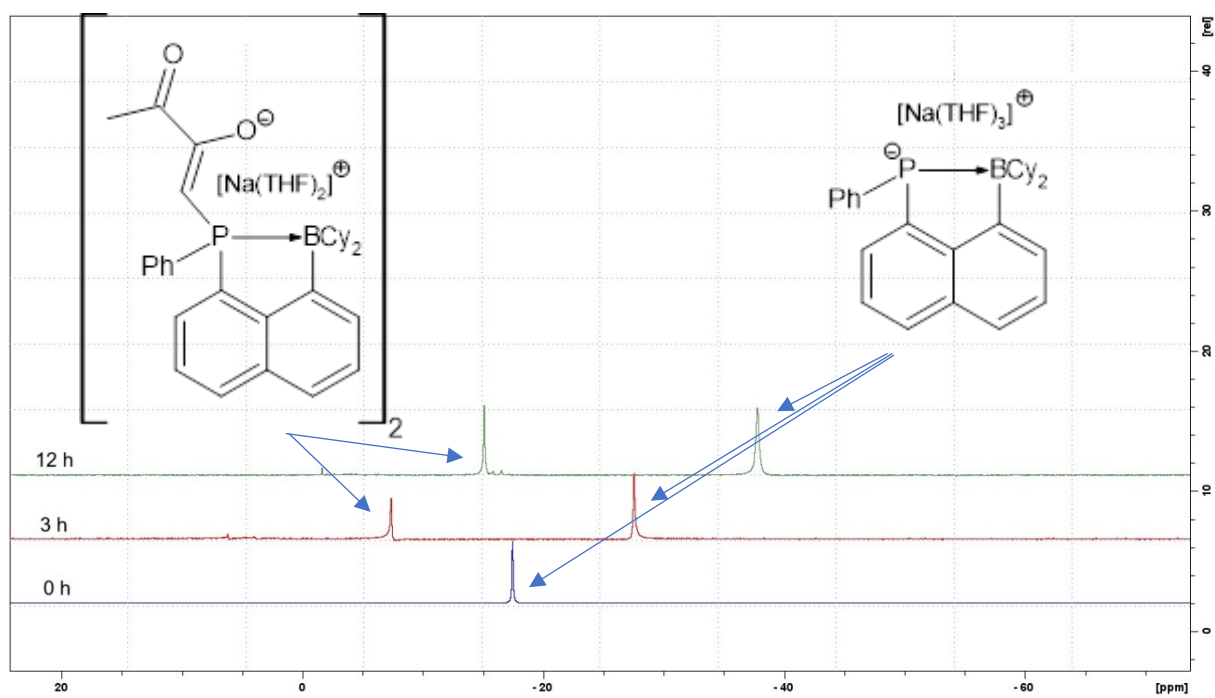

Figure S58. The  $^{31}\text{P}\{^1\text{H}\}$  NMR spectra of the reaction mixture of **5** and 2,3-butanedione

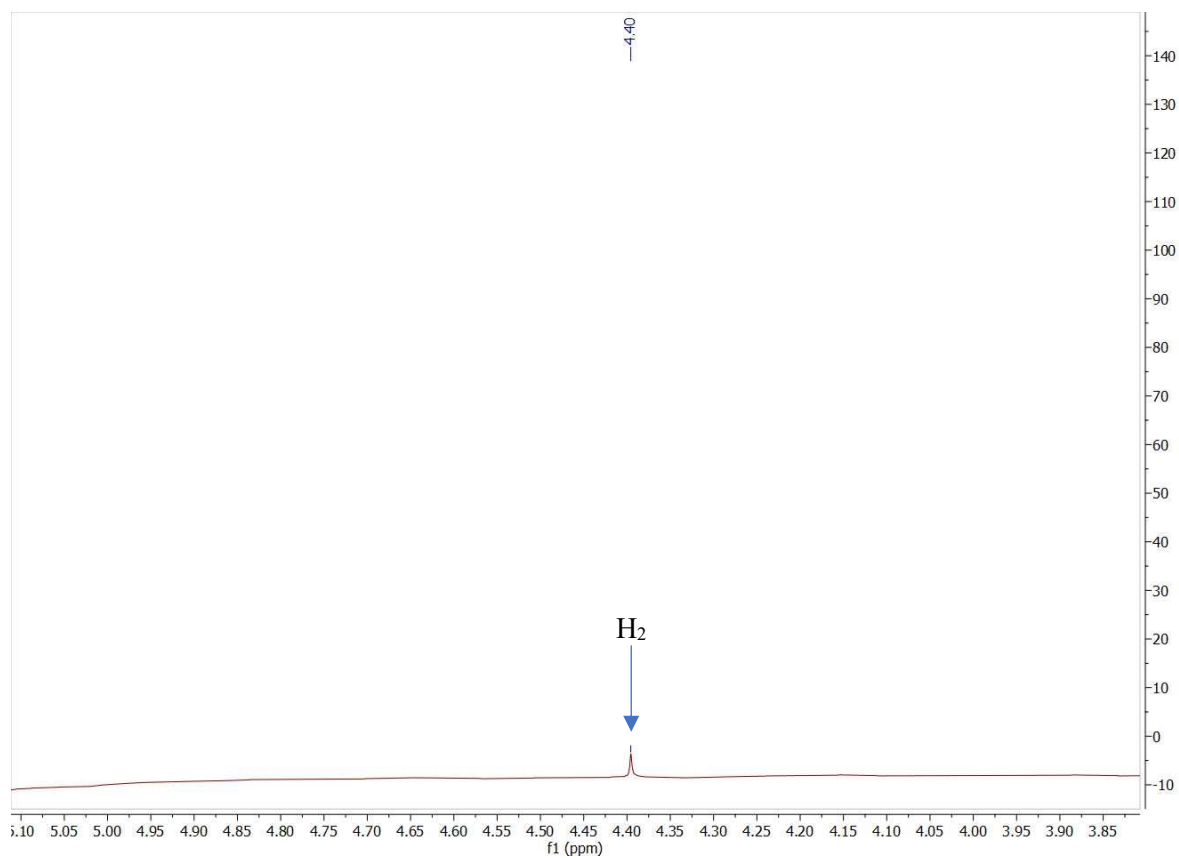

Figure S59.  $^1\text{H}$  NMR spectrum of  $\text{H}_2$  in  $\text{THF}/\text{C}_6\text{D}_6$

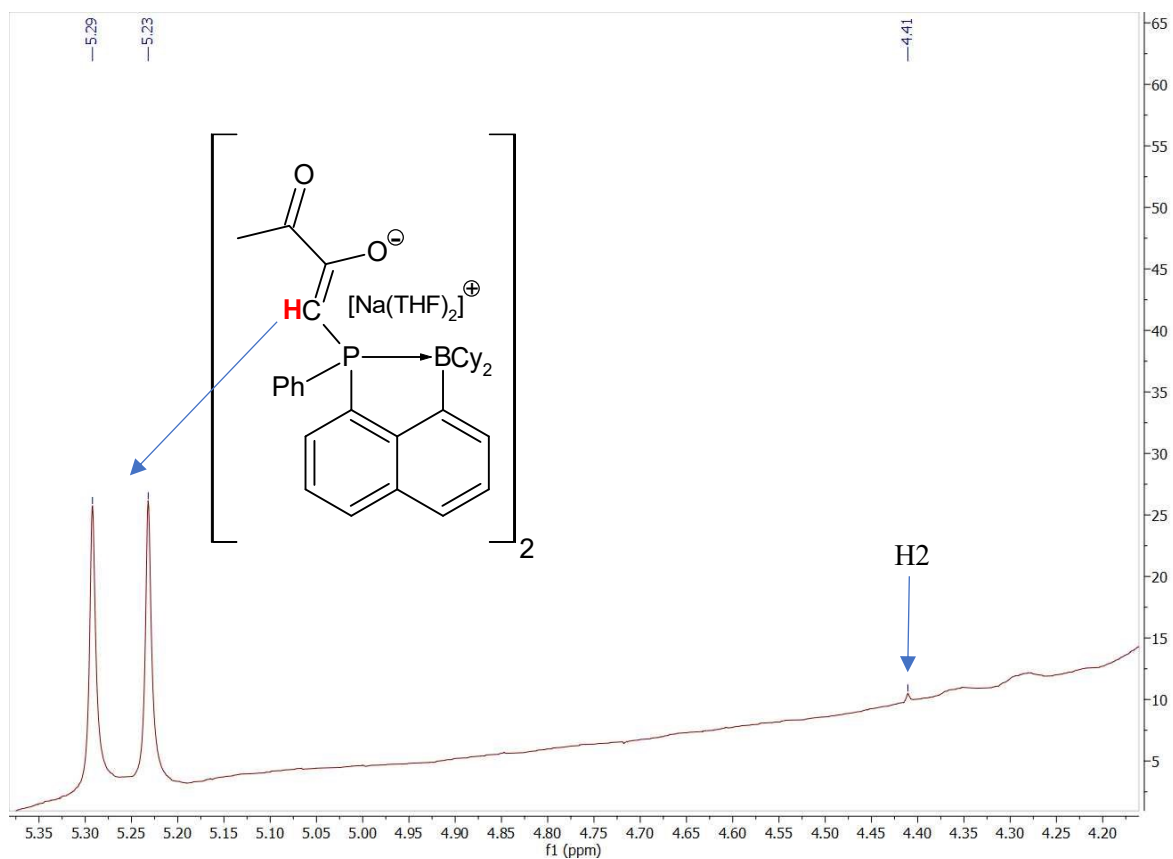

Figure S60. Expanded part of the  $^1\text{H}$  NMR spectrum of the reaction mixture of 5 and 2,3-butanedione in THF/ $\text{C}_6\text{D}_6$ .

**Table S1:** Crystallographic data of compounds **3**, **4**·(C<sub>4</sub>H<sub>8</sub>O), **5**, **6**, **7**, **9**, **10**·2(C<sub>4</sub>H<sub>8</sub>O), **11**, and **12**·0.5(C<sub>7</sub>H<sub>8</sub>)

| Compound                                             | <b>3</b>                                                      | <b>4</b> ·(C <sub>4</sub> H <sub>8</sub> O)                                                         | <b>5</b>                                            | <b>6</b>                                           | <b>7</b>                                                                                     | <b>9</b>                                                                                                     | <b>10</b> ·2(C <sub>4</sub> H <sub>8</sub> O)                                                                                         | <b>11</b>                                 | <b>12</b> ·0.5(C <sub>7</sub> H <sub>8</sub> )                                 |
|------------------------------------------------------|---------------------------------------------------------------|-----------------------------------------------------------------------------------------------------|-----------------------------------------------------|----------------------------------------------------|----------------------------------------------------------------------------------------------|--------------------------------------------------------------------------------------------------------------|---------------------------------------------------------------------------------------------------------------------------------------|-------------------------------------------|--------------------------------------------------------------------------------|
| Empirical formula                                    | C <sub>44</sub> H <sub>56</sub> B <sub>2</sub> P <sub>2</sub> | C <sub>56</sub> H <sub>66</sub> B <sub>2</sub> P <sub>2</sub><br>·(C <sub>4</sub> H <sub>8</sub> O) | C <sub>40</sub> H <sub>57</sub> BNaO <sub>3</sub> P | C <sub>36</sub> H <sub>49</sub> BKO <sub>2</sub> P | C <sub>72</sub> H <sub>98</sub> B <sub>2</sub> Na <sub>2</sub> O <sub>6</sub> P <sub>2</sub> | C <sub>72</sub> H <sub>98</sub> B <sub>2</sub> Na <sub>2</sub> O <sub>4</sub> Se <sub>2</sub> P <sub>2</sub> | C <sub>80</sub> H <sub>106</sub> B <sub>2</sub> Na <sub>2</sub> O <sub>8</sub> P <sub>2</sub> ,<br>2(C <sub>4</sub> H <sub>8</sub> O) | C <sub>33</sub> H <sub>42</sub> BOP       | C <sub>40</sub> H <sub>52</sub> BNP<br>Sn, 0.5(C <sub>7</sub> H <sub>8</sub> ) |
| Crystal system                                       | Triclinic                                                     | Triclinic                                                                                           | orthorhombic                                        | monoclinic                                         | monoclinic                                                                                   | Triclinic                                                                                                    | Triclinic                                                                                                                             | orthorhombic                              | monoclinic                                                                     |
| Space group                                          | <i>P</i> -1                                                   | <i>P</i> -1                                                                                         | <i>Pna</i> 2 <sub>1</sub>                           | <i>P</i> 2 <sub>1</sub> / <i>n</i>                 | <i>P</i> 2 <sub>1</sub> / <i>n</i>                                                           | <i>P</i> -1                                                                                                  | <i>P</i> -1                                                                                                                           | <i>P</i> - <i>b</i> - <i>c</i> - <i>a</i> | <i>P</i> 2 <sub>1</sub> / <i>n</i>                                             |
| a (Å)                                                | 11.682(3)                                                     | 12.7391(4)                                                                                          | 18.0350(18)                                         | 11.7259(5)                                         | 12.4520 (5)                                                                                  | 10.3398(6)                                                                                                   | 11.2912(16)                                                                                                                           | 12.4512(11)                               | 10.6741(4)                                                                     |
| b (Å)                                                | 13.1359(19)                                                   | 13.6807(5)                                                                                          | 10.8962(10)                                         | 13.9936(5)                                         | 21.9900 (7)                                                                                  | 11.6405(7)                                                                                                   | 12.339(2)                                                                                                                             | 18.8303(14)                               | 23.3192(9)                                                                     |
| c (Å)                                                | 13.467(2))                                                    | 16.2189(5)                                                                                          | 19.662(4)                                           | 20.7353(8)                                         | 12.6888 (5)                                                                                  | 14.3578(9)                                                                                                   | 15.225(3)                                                                                                                             | 24.5695(19)                               | 15.7863(6)                                                                     |
| α (°)                                                | 73.078(5)                                                     | 65.293(2)                                                                                           | 90                                                  | 90                                                 | 90                                                                                           | 93.217(2)                                                                                                    | 79.661(5)                                                                                                                             | 90                                        | 90                                                                             |
| β (°)                                                | 79.266(9)                                                     | 80.363(2)                                                                                           | 90                                                  | 104.2330(10)                                       | 106.105 (2)                                                                                  | 93.157(2)                                                                                                    | 79.404(6)                                                                                                                             | 90                                        | 100.784(2)                                                                     |
| γ (°)                                                | 71.317(9)                                                     | 77.830(2)                                                                                           | 90                                                  | 90                                                 | 90                                                                                           | 102.117(2)                                                                                                   | 88.828(5)                                                                                                                             | 90                                        | 90                                                                             |
| Z                                                    | 2                                                             | 2                                                                                                   | 4                                                   | 4                                                  | 2                                                                                            | 1                                                                                                            | 1                                                                                                                                     | 8                                         | 4                                                                              |
| V (Å <sup>3</sup> )                                  | 1863.1(6)                                                     | 2500.14(15)                                                                                         | 3863.9(9)                                           | 3298.0(2)                                          | 3338.1(2)                                                                                    | 1682.99(18)                                                                                                  | 2051.1(6)                                                                                                                             | 5760.6(8)                                 | 3860.0(3)                                                                      |
| D <sub>c</sub> (g cm <sup>-3</sup> )                 | 1.192                                                         | 1.189                                                                                               | 1.118                                               | 1.198                                              | 1.183                                                                                        | 1.297                                                                                                        | 1.190                                                                                                                                 | 1.145                                     | 1.320                                                                          |
| μ (mm <sup>-1</sup> )                                | 0.148                                                         | 0.128                                                                                               | 0.117                                               | 0.240                                              | 0.129                                                                                        | 1.206                                                                                                        | 0.121                                                                                                                                 | 0.119                                     | 0.740                                                                          |
| Reflections measured                                 | 48821                                                         | 61236                                                                                               | 34880                                               | 97874                                              | 110937                                                                                       | 67540                                                                                                        | 65674                                                                                                                                 | 25448                                     | 87950                                                                          |
| -<br>independent<br>(R <sub>int</sub> ) <sup>a</sup> | 41237<br>(0.0700)                                             | 11528<br>(0.1014)                                                                                   | 8653 (0.0577)                                       | 7585 (0.0408)                                      | 7689 (0.0214)                                                                                | 6572 (0.0234)                                                                                                | 9469 (0.0341)                                                                                                                         | 4958 (0.0483)                             | 8886 (0.0275)                                                                  |



|                                    |                    |                    |                 |                    |                 |                 |                 |                    |                    |
|------------------------------------|--------------------|--------------------|-----------------|--------------------|-----------------|-----------------|-----------------|--------------------|--------------------|
| - observed<br>[I>2σ(I)]            | 6207               | 7125               | 6656            | 5573               | 6481            | 6315            | 7330            | 4039               | 7437               |
| Parameters<br>refined              | 421                | 578                | 454             | 370                | 379             | 405             | 535             | 328                | 410                |
| R <sup>c)</sup> / wR <sup>c)</sup> | 0.0706 /<br>0.1307 | 0.0651 /<br>0.1508 | 0.0649 / 0.1652 | 0.0547 /<br>0.1509 | 0.0493 / 0.1205 | 0.0830 / 0.2510 | 0.0589 / 0.1672 | 0.0715 /<br>0.1435 | 0.0305 /<br>0.0678 |

---

${}^a R_{\text{int}} = \frac{\sum |F_o^2 - F_{o,\text{mean}}^2|}{\sum F_o^2}$ ,  ${}^b GOF = \left[ \frac{\sum (w(F_o^2 - F_c^2)^2)}{(N_{\text{diffs}} - N_{\text{params}})} \right]^{1/2}$ ,  ${}^c$ Weighting scheme:  $w = [\sigma^2(F_o^2) + (w_1 P)^2 + w_2 P]^{-1}$ , where  $P = [\max(F_o^2) + 2F_c^2]$ ,  $R(F) = \frac{\sum | |F_o| - |F_c| |}{\sum |F_o|}$ ,  $wR(F^2) = \left[ \frac{\sum (w(F_o^2 - F_c^2)^2)}{(\sum w(F_o^2)^2)} \right]^{1/2}$

---
